# Supplementary material for: Scrambled eggs: Proteomic portraits and novel biomarkers of egg quality in zebrafish (Danio rerio)
Source: PubMed Central journal article supplement (PMC5690628; doi:10.1371/journal.pone.0188084), 2017-11-16
Supplement: pone.0188084.s001.pdf [file pone.0188084.s001.pdf]

**S1 Table. Proteins differentially regulated in the Pooled Samples Experiment.** List of the 892 proteins from the Pooled Samples Experiment that were considered to be differentially regulated between egg quality groups and whose distribution among various functional categories is illustrated in Fig 2a. These include proteins detected only in poor quality eggs (PQ UNIQUE, n=211), proteins in poor quality eggs with N-SC increased  $\geq 2$ -fold relative to values for good quality eggs (PQ INCREASED, n=186), proteins detected only in good quality eggs (GQ UNIQUE, n=136), and proteins in good quality eggs with N-SC increased  $\geq 2$ -fold relative to values for poor quality eggs (GQ INCREASED, n=359). For each protein, the Ensembl Protein ID and associated gene, transcript and protein name, functional category (Fig 2a), relative abundance (UNIQUE or INCREASED), and fold-difference in N-SC between egg quality groups (if available) is shown. Color shading corresponds to that used to designate functional categories in Fig 2.

| Ensembl Protein ID | Associated Gene Name | Associated Transcript Name | Protein Full Name      | Functional Category                                                                                | Regulation                                   | Fold Difference |   |
|--------------------|----------------------|----------------------------|------------------------|----------------------------------------------------------------------------------------------------|----------------------------------------------|-----------------|---|
| 1                  | ENSDARP0000030257    | si:ch211-226h8.8           | si:ch211-226h8.8-201   | Uncharacterized protein containing SUEL type lectin domain                                         | Lectins                                      | PQ UNIQUE       | - |
| 2                  | ENSDARP00000113274   | si:ch211-226h8.8           | si:ch211-226h8.8-001   | Uncharacterized protein containing SUEL type lectin domain                                         | Lectins                                      | PQ UNIQUE       | - |
| 3                  | ENSDARP00000121868   | zgc:172218                 | Novel (zgc:17218-001)  | Uncharacterized protein containing 3SUEL type lectin domains                                       | Lectins                                      | PQ UNIQUE       | - |
| 4                  | ENSDARP00000117390   | si:ch211-226h8.11          | si:ch211-226h8.11-001  | L-rhamnose-binding lectin CSL3-like isoform X1                                                     | Lectins                                      | PQ UNIQUE       | - |
| 5                  | ENSDARP00000061148   | ENSDARP00000122263         | zgc:55461-001          | TUBB - tubulin, beta 4A class IVa-like                                                             | Cell cycle, division, growth and fate        | PQ UNIQUE       | - |
| 6                  | ENSDARP00000072581   | zgc:172218                 | Novel (zgc:172218-201) | Uncharacterized protein--w 3 lectin domains                                                        | Lectins                                      | PQ UNIQUE       | - |
| 7                  | ENSDARP00000104203   | AL929192.3                 | AL929192.3-201         | Novel protein containing galactose binding lectin domains                                          | Lectins                                      | PQ UNIQUE       | - |
| 8                  | ENSDARP00000095074   | cnp                        | cnp-201                | 2',3'-cyclic nucleotide 3' phosphodiesterase                                                       | Cell cycle, division, growth and fate        | PQ UNIQUE       | - |
| 9                  | ENSDARP00000053151   | cbr1                       | cbr1-001               | Carbonyl reductase 1                                                                               | Lipid metabolism                             | PQ UNIQUE       | - |
| 10                 | ENSDARP00000024748   | zgc:86598                  | zgc:86598-001          | Uncharacterized protein--casein kinase family protein                                              | Other                                        | PQ UNIQUE       | - |
| 11                 | ENSDARP00000068088   | hp                         | hp-201                 | Haptoglobin                                                                                        | Immune system related                        | PQ UNIQUE       | - |
| 12                 | ENSDARP00000108424   | zgc:86598                  | zgc:86598-002          | Protien kinase                                                                                     | Protein Synthesis                            | PQ UNIQUE       | - |
| 13                 | ENSDARP00000106833   | ZP2 (4 of 4)               | ZP2 (4 of 4)-201       | Zona pellucida glycoprotein 2 (sperm receptor)                                                     | Zona Pellucida proteins                      | PQ UNIQUE       | - |
| 14                 | ENSDARP00000117065   | zgc:152652                 | zgc:152652-001         | Uncharacterized protein                                                                            | Other                                        | PQ UNIQUE       | - |
| 15                 | ENSDARP00000109829   | zgc:171474                 | zgc:171474-001         | Uncharacterized protein                                                                            | Other                                        | PQ UNIQUE       | - |
| 16                 | ENSDARP00000125025   | hp                         | hp-001                 | Haptoglobin                                                                                        | Immune system related                        | PQ UNIQUE       | - |
| 17                 | ENSDARP00000118911   | ck2a1                      | ck2a1-003              | Casein kinase 2 alpha 1                                                                            | Protein Synthesis                            | PQ UNIQUE       | - |
| 18                 | ENSDARP00000116024   | ck2a1                      | ck2a1-004              | Casein kinase 2 alpha 1                                                                            | Protein Synthesis                            | PQ UNIQUE       | - |
| 19                 | ENSDARP00000129511   | wdfy1                      | wdfy1-001              | WD repeat and FYVE domain containing 1                                                             | Endosome-Lysosome related                    | PQ UNIQUE       | - |
| 20                 | ENSDARP00000103118   | zgc:100918                 | Novel                  | uncharacterized Rab7-like, ras-related, protein                                                    | Endosome-Lysosome related                    | PQ UNIQUE       | - |
| 21                 | ENSDARP00000111138   | zgc:100918                 | Novel                  | uncharacterized Rab7a-like, ras-related, protein                                                   | Endosome-Lysosome related                    | PQ UNIQUE       | - |
| 22                 | ENSDARP00000113694   | ck2a1                      | ck2a1-002              | Casein kinase 2 alpha 1                                                                            | Protein Synthesis                            | PQ UNIQUE       | - |
| 23                 | ENSDARP00000014852   | itln3                      | itln3-201              | Intelectin 3                                                                                       | Immune system related                        | PQ UNIQUE       | - |
| 24                 | ENSDARP00000042593   | hn1b                       | hn1b-001               | Hematological and neurological expressed 1b                                                        | Cell cycle, division, growth and fate        | PQ UNIQUE       | - |
| 25                 | ENSDARP00000110275   | FARS2 (2 of 2)             | FARS2 (2 of 2)-201     | Phenylalanine-tRNA synthetase 2                                                                    | Protein Synthesis                            | PQ UNIQUE       | - |
| 26                 | ENSDARP00000122499   | CU467646.3                 | CU467646.3-201         | Uncharacterized protein                                                                            | Other                                        | PQ UNIQUE       | - |
| 27                 | ENSDARP00000006001   | ck2a1                      | ck2a1-001              | Casein kinase 2 alpha 1                                                                            | Protein Synthesis                            | PQ UNIQUE       | - |
| 28                 | ENSDARP00000056550   | ck2a1                      | ck2a1-201              | Casein kinase 2 alpha 1                                                                            | Protein Synthesis                            | PQ UNIQUE       | - |
| 29                 | ENSDARP00000103535   | BX548000.1                 | BX548000.1-201         | Uncharacterized protein                                                                            | Other                                        | PQ UNIQUE       | - |
| 30                 | ENSDARP00000165440   | rab11a1                    | rab11a1-001            | RAB11a, member RAS oncogene family, like                                                           | Oncogenes related                            | PQ UNIQUE       | - |
| 31                 | ENSDARP00000124572   | hp                         | hp-002                 | Haptoglobin                                                                                        | Immune system related                        | PQ UNIQUE       | - |
| 32                 | ENSDARP00000053863   | gcdh                       | gcdh-201               | Glutaryl-Coenzyme A dehydrogenase                                                                  | Lipid metabolism                             | PQ UNIQUE       | - |
| 33                 | ENSDARP00000112983   | gcdh                       | gcdh-001               | Glutaryl-Coenzyme A dehydrogenase                                                                  | Lipid metabolism                             | PQ UNIQUE       | - |
| 34                 | ENSDARP00000120266   | C9H21orf33                 | C9H21orf33-001         | Chromosome 21 open reading frame 33                                                                | Energy metabolism                            | PQ UNIQUE       | - |
| 35                 | ENSDARP00000071656   | cox7a3                     | cox7a3-001             | Cytochrome c oxidase subunit VIIa polypeptide 3                                                    | Energy metabolism                            | PQ UNIQUE       | - |
| 36                 | ENSDARP00000125277   | USMG5                      | USMG5-001              | Up-regulated during skeletal muscle growth 5 homolog (mouse)                                       | Cell cycle, division, growth and fate        | PQ UNIQUE       | - |
| 37                 | ENSDARP00000125356   | USMG5                      | USMG5-002              | Up-regulated during skeletal muscle growth 5 homolog (mouse)                                       | Cell cycle, division, growth and fate        | PQ UNIQUE       | - |
| 38                 | ENSDARP00000112178   | fgg                        | fgg-201                | Fibrinogen, gamma polypeptide                                                                      | Immune system related                        | PQ UNIQUE       | - |
| 39                 | ENSDARP00000124470   | si:dkey-87o1.2             | si:dkey-87o1.2-001     | Uncharacterized protein                                                                            | Other                                        | PQ UNIQUE       | - |
| 40                 | ENSDARP00000121763   | coro1cb                    | coro1cb-002            | Coronin, actin binding protein, 1Cb                                                                | Endosome-Lysosome related                    | PQ UNIQUE       | - |
| 41                 | ENSDARP00000108470   | SMIM20                     | SMIM20-201             | Small integral membrane protein 20                                                                 | Other                                        | PQ UNIQUE       | - |
| 42                 | ENSDARP00000049002   | atp6v1aa-001               | atp6v1aa-001           | ATPase, H+ transporting, lysosomal V1 subunit Aa                                                   | Endosome-Lysosome related                    | PQ UNIQUE       | - |
| 43                 | ENSDARP00000116576   | fkbp3                      | fkbp3-001              | FK506 binding protein 3                                                                            | Protein Synthesis                            | PQ UNIQUE       | - |
| 44                 | ENSDARP00000122221   | csb1                       | csb1-003               | Cysteine conjugate-beta lyase, cytoplasmic (glutamine transaminase K, kynurenine aminotransferase) | Oncogenes related                            | PQ UNIQUE       | - |
| 45                 | ENSDARP00000063415   | mase12                     | mase12-001             | Ribonuclease like 2                                                                                | Immune system related                        | PQ UNIQUE       | - |
| 46                 | ENSDARP00000113451   | si:dkeyp-20e4.8            | si:dkeyp-20e4.8-001    | Uncharacterized protein                                                                            | Other                                        | PQ UNIQUE       | - |
| 47                 | ENSDARP00000088889   | ita1                       | ita1-001               | Cytotoxic granule-associated RNA binding protein 1                                                 | Apoptosis related                            | PQ UNIQUE       | - |
| 48                 | ENSDARP00000003248   | zgc:77118                  | zgc:77118-001          | Palmitoyl-(protein) hydrolase activity                                                             | Other                                        | PQ UNIQUE       | - |
| 49                 | ENSDARP00000126272   | actr10                     | actr10-001             | Actin-related protein 10 homolog (S. cerevisiae)                                                   | Cell cycle, division, growth and fate        | PQ UNIQUE       | - |
| 50                 | ENSDARP00000123855   | si:dkey-87o1.2             | si:dkey-87o1.2-003     | Uncharacterized protein                                                                            | Other                                        | PQ UNIQUE       | - |
| 51                 | ENSDARP00000124841   | si:dkey-87o1.2             | si:dkey-87o1.2-002     | Uncharacterized protein                                                                            | Other                                        | PQ UNIQUE       | - |
| 52                 | ENSDARP00000128259   | sh3glb2a                   | sh3glb2a-004           | SH3-domain GRB2-like endophilin B2a                                                                | Endosome-Lysosome related                    | PQ UNIQUE       | - |
| 53                 | ENSDARP00000026575   | rbm8a                      | rbm8a-001              | RNA binding motif protein 8A                                                                       | Protein Synthesis                            | PQ UNIQUE       | - |
| 54                 | ENSDARP00000114997   | hmbg2a                     | hmbg2a-003             | High-mobility group box 2a                                                                         | Apoptosis related                            | PQ UNIQUE       | - |
| 55                 | ENSDARP00000124034   | psmc1a                     | psmc1a-002             | Proteasome (prosome, macropain) 26S subunit, ATPase, 1a                                            | Protein degradation and synthesis inhibition | PQ UNIQUE       | - |
| 56                 | ENSDARP00000090477   | si:ch73-95i15.3            | si:ch73-95i15.3-201    | Fatty acid elongation in mitochondria-lysosome                                                     | Lipid metabolism                             | PQ UNIQUE       | - |
| 57                 | ENSDARP00000128868   | si:ch73-95i15.3            | si:ch73-95i15.3-001    | Fatty acid elongation in mitochondria-lysosome                                                     | Lipid metabolism                             | PQ UNIQUE       | - |
| 58                 | ENSDARP00000100627   | purbb                      | purbb-201              | Purine-rich element binding protein Bb                                                             | Protein Synthesis                            | PQ UNIQUE       | - |
| 59                 | ENSDARP00000120767   | ufd1l                      | ufd1l-003              | Ubiquitin fusion degradation 1-like                                                                | Protein degradation and synthesis inhibition | PQ UNIQUE       | - |

|     |                     |                 |                    |                                                                |                                              |           |   |
|-----|---------------------|-----------------|--------------------|----------------------------------------------------------------|----------------------------------------------|-----------|---|
| 60  | ENSDARP00000124354  | mapk1           | mapk1-004          | Mitogen-activated protein kinase 1                             | Apoptosis related                            | PQ UNIQUE | - |
| 61  | ENSDARP00000117412  | med20           | med20-001          | Mediator complex subunit 20                                    | Protein Synthesis                            | PQ UNIQUE | - |
| 62  | ENSDARP00000126190  | krt17           | krt17-002          | Keratin 15                                                     | Cell cycle, division, growth and fate        | PQ UNIQUE | - |
| 63  | ENSDARP00000067637  | med20           | med20-201          | Mediator complex subunit 20                                    | Protein Synthesis                            | PQ UNIQUE | - |
| 64  | ENSDARP00000007602  | ppp2r2ab        | ppp2r2ab-201       | Protein phosphatase 2, regulatory subunit B, alpha b           | Protein Synthesis                            | PQ UNIQUE | - |
| 65  | ENSDARP00000117378  | ppp2r2ab        | ppp2r2ab-001       | Protein phosphatase 2, regulatory subunit B, alpha b           | Cell cycle, division, growth and fate        | PQ UNIQUE | - |
| 66  | ENSDARP00000066854  | fars2           | fars2-001          | phenylalanyl-tRNA synthetase 2, mitochondrial                  | Protein Synthesis                            | PQ UNIQUE | - |
| 67  | ENSDARP00000128723  | sh3glb2a        | sh3glb2a-001       | SH3-domain GRB2-like endophilin B2a                            | Endosome-Lysosome related                    | PQ UNIQUE | - |
| 68  | ENSDARP00000118809  | si:dkey-51e6.1  | si:dkey-51e6.1-001 | Uncharacterized protein                                        | Other                                        | PQ UNIQUE | - |
| 69  | ENSDARP00000061755  | si:dkey-51e6.1  | si:dkey-51e6.1-201 | Uncharacterized protein                                        | Other                                        | PQ UNIQUE | - |
| 70  | ENSDARP00000110749  | casp3           | casp3-002          | Nigella arvensis cysteine protease 30, Nlike catalytic subunit | Oncogenes related                            | PQ UNIQUE | - |
| 71  | ENSDARP00000116767  | comtd1          | comtd1-002         | Catechol-O-methyltransferase domain containing 1               | Other                                        | PQ UNIQUE | - |
| 72  | ENSDARP00000115915  | casp3a          | casp3a-004         | Caspase 3, apoptosis-related cysteine protease a               | Apoptosis related                            | PQ UNIQUE | - |
| 73  | ENSDARP00000111328  | BX470131.2      | BX470131.2-201     | Uncharacterized protein--LOC568697 (LOC568697), mRNA           | Other                                        | PQ UNIQUE | - |
| 74  | ENSDARP00000112094  | polr1c          | polr1c-001         | Polymerase (RNA) I polypeptide C                               | Protein Synthesis                            | PQ UNIQUE | - |
| 75  | ENSDARP00000127587  | sh3glb2a        | sh3glb2a-002       | SH3-domain GRB2-like endophilin B2a                            | Endosome-Lysosome related                    | PQ UNIQUE | - |
| 76  | ENSDARP00000053935  | pfdn6           | pfdn6-001          | Prefoldin subunit 6                                            | Protein Synthesis                            | PQ UNIQUE | - |
| 77  | ENSDARP00000087463  | nhp21a          | nhp21a-001         | NHP2 non-histone chromosome protein 2-like 1a (S. cerevisiae)  | Protein Synthesis                            | PQ UNIQUE | - |
| 78  | ENSDARP00000127398  | fnb1            | fnb1-003           | Farnesyltransferase, CAAX box, beta                            | Other                                        | PQ UNIQUE | - |
| 79  | ENSDARP00000006309  | wdfy1           | wdfy1-201          | WD repeat and FYVE domain containing 1                         | Endosome-Lysosome related                    | PQ UNIQUE | - |
| 80  | ENSDARP00000100638  | atp6v0d1        | atp6v0d1-201       | ATPase, H+ transporting, V0 subunit D isoform 1                | Endosome-Lysosome related                    | PQ UNIQUE | - |
| 81  | ENSDARP00000113069  | NAPB (2 of 2)   | NAPB (2 of 2)-001  | N-ethylmaleimide-sensitive factor attachment protein, beta     | Protein Synthesis                            | PQ UNIQUE | - |
| 82  | ENSDARP00000127072  | scrm2           | scrm2-002          | Secernin 2                                                     | Protein degradation and synthesis inhibition | PQ UNIQUE | - |
| 83  | ENSDARP00000129285  | ECH1 (2 of 2)   | ECH1 (2 of 2)-002  | Enoyl CoA hydratase 1, peroxisomal                             | Lipid metabolism                             | PQ UNIQUE | - |
| 84  | ENSDARP00000059475  | psmg1           | psmg1-001          | Proteasome (prosome, macropain) assembly chaperone 1           | Protein degradation and synthesis inhibition | PQ UNIQUE | - |
| 85  | ENSDARP00000009111  | actr10          | actr10-201         | Actin-related protein 10 homolog (S. cerevisiae)               | Cell cycle, division, growth and fate        | PQ UNIQUE | - |
| 86  | ENSDARP00000105905  | CU928126.3      | CU928126.3-201     | Casein kinase II subunit alpha-like isoform X1                 | Protein Synthesis                            | PQ UNIQUE | - |
| 87  | ENSDARP00000115880  | comtd1          | comtd1-001         | Catechol-O-methyltransferase domain containing 1               | Other                                        | PQ UNIQUE | - |
| 88  | ENSDARP00000094516  | ppp4ca          | ppp4ca-001         | Protein phosphatase 4 (formerly X), catalytic subunit a        | Apoptosis related                            | PQ UNIQUE | - |
| 89  | ENSDARP00000124293  | cbx1b           | cbx1b-003          | Chromobox homolog 1b (HP1 beta homolog Drosophila)             | Cell cycle, division, growth and fate        | PQ UNIQUE | - |
| 90  | ENSDARP00000101062  | purba           | purba-001          | Purine-rich element binding protein Ba                         | Protein Synthesis                            | PQ UNIQUE | - |
| 91  | ENSDARP00000125785  | seh1l           | seh1l-002          | SEH1-like (S. cerevisiae)                                      | Cell cycle, division, growth and fate        | PQ UNIQUE | - |
| 92  | ENSDARP00000112994  | zgc:171977      | zgc:171977-001     | Uncharacterized protein                                        | Other                                        | PQ UNIQUE | - |
| 93  | ENSDARP00000122910  | snx12           | snx12-005          | Sorting nexin 12                                               | Endosome-Lysosome related                    | PQ UNIQUE | - |
| 94  | ENSDARP00000008027  | snx12           | snx12-001          | Sorting nexin 12                                               | Endosome-Lysosome related                    | PQ UNIQUE | - |
| 95  | ENSDARP00000122028  | pbdc1           | pbdc1-001          | Polysaccharide biosynthesis domain containing 1                | Protein degradation and synthesis inhibition | PQ UNIQUE | - |
| 96  | ENSDARP00000123575  | hmgb2a          | hmgb2a-004         | High-mobility group box 2a                                     | Apoptosis related                            | PQ UNIQUE | - |
| 97  | ENSDARP00000088891  | ddrgk1          | ddrgk1-202         | DDRKG domain containing 1                                      | Protein degradation and synthesis inhibition | PQ UNIQUE | - |
| 98  | ENSDARP000000004839 | dnajb11         | dnajb11-201        | DnaJ (Hsp40) homolog, subfamily B, member 11                   | Protein Synthesis                            | PQ UNIQUE | - |
| 99  | ENSDARP00000107433  | dnajb11         | dnajb11-001        | DnaJ (Hsp40) homolog, subfamily B, member 11                   | Protein Synthesis                            | PQ UNIQUE | - |
| 100 | ENSDARP00000122189  | nasp            | nasp-003           | Nuclear autoantigenic sperm protein (histone-binding)          | Cell cycle, division, growth and fate        | PQ UNIQUE | - |
| 101 | ENSDARP00000004932  | myl1            | myl1-001           | Myosin, light chain 1, alkali; skeletal, fast                  | Cell cycle, division, growth and fate        | PQ UNIQUE | - |
| 102 | ENSDARP00000051402  | sh3glb2a        | sh3glb2a-201       | SH3-domain GRB2-like endophilin B2a                            | Endosome-Lysosome related                    | PQ UNIQUE | - |
| 103 | ENSDARP00000072059  | cfb             | cfb-001            | Complement factor B                                            | Immune system related                        | PQ UNIQUE | - |
| 104 | ENSDARP00000106788  | ctsa            | ctsa-201           | Cathepsin A                                                    | Protein degradation and synthesis inhibition | PQ UNIQUE | - |
| 105 | ENSDARP00000017647  | gins1           | gins1-201          | GINS complex subunit 1 (Psf1 homolog)                          | Cell cycle, division, growth and fate        | PQ UNIQUE | - |
| 106 | ENSDARP00000119427  | uba1            | uba1-003           | Ubiquitin-like modifier activating enzyme 1                    | Protein degradation and synthesis inhibition | PQ UNIQUE | - |
| 107 | ENSDARP00000128686  | sh3glb2a        | sh3glb2a-003       | SH3-domain GRB2-like endophilin B2a                            | Endosome-Lysosome related                    | PQ UNIQUE | - |
| 108 | ENSDARP00000039666  | cbx1b           | cbx1b-201          | Chromobox homolog 1b (HP1 beta homolog Drosophila)             | Cell cycle, division, growth and fate        | PQ UNIQUE | - |
| 109 | ENSDARP00000109344  | novel-actn4_rat | Novel              | Novel                                                          | Oncogenes related                            | PQ UNIQUE | - |
| 110 | ENSDARP00000113004  | cbx1b           | cbx1b-001          | Chromobox homolog 1b (HP1 beta homolog Drosophila)             | Cell cycle, division, growth and fate        | PQ UNIQUE | - |
| 111 | ENSDARP00000127314  | capgb           | capgb-002          | Capping protein (actin filament), gelsolin-like b              | Cell cycle, division, growth and fate        | PQ UNIQUE | - |
| 112 | ENSDARP00000123185  | actn1           | actn1-003          | Actinin, alpha 1                                               | Cell cycle, division, growth and fate        | PQ UNIQUE | - |
| 113 | ENSDARP000000095774 | krt17           | krt17-001          | Keratin 15                                                     | Cell cycle, division, growth and fate        | PQ UNIQUE | - |
| 114 | ENSDARP00000118428  | psmb7           | psmb7-003          | Proteasome (prosome, macropain) subunit, beta type, 7          | Protein degradation and synthesis inhibition | PQ UNIQUE | - |
| 115 | ENSDARP00000118656  | cbx1a           | cbx1a-001          | Chromobox homolog 1a (HP1 beta homolog Drosophila)             | Protein degradation and synthesis inhibition | PQ UNIQUE | - |
| 116 | ENSDARP000000031553 | eif4e1c         | eif4e1c-001        | Eukaryotic translation initiation factor 4E family member 1c   | Protein Synthesis                            | PQ UNIQUE | - |
| 117 | ENSDARP000000047158 | hmgb2a          | hmgb2a-001         | High-mobility group box 2a                                     | Apoptosis related                            | PQ UNIQUE | - |
| 118 | ENSDARP00000016201  | tm9sf2          | tm9sf2-001         | Transmembrane 9 superfamily member 2                           | Endosome-Lysosome related                    | PQ UNIQUE | - |
| 119 | ENSDARP000000061395 | chmp5b          | chmp5b-001         | charged multivesicular body protein 5b                         | Endosome-Lysosome related                    | PQ UNIQUE | - |
| 120 | ENSDARP00000127370  | eef1db          | eef1db-005         | Elongation factor-1, delta, b                                  | Protein Synthesis                            | PQ UNIQUE | - |
| 121 | ENSDARP00000129156  | napba           | napba-001          | N-ethylmaleimide-sensitive factor attachment protein, beta a   | Protein degradation and synthesis inhibition | PQ UNIQUE | - |
| 122 | ENSDARP00000009369  | krt15           | krt15-201          | Keratin 15                                                     | Cell cycle, division, growth and fate        | PQ UNIQUE | - |
| 123 | ENSDARP000000095029 | krt15           | krt15-001          | Keratin 15                                                     | Cell cycle, division, growth and fate        | PQ UNIQUE | - |
| 124 | ENSDARP00000119224  | eif4e1c         | eif4e1c-003        | Eukaryotic translation initiation factor 4E family member 1c   | Protein Synthesis                            | PQ UNIQUE | - |
| 125 | ENSDARP00000128345  | fars2           | fars2-201          | Phenylalanyl-tRNA synthetase 2                                 | Protein Synthesis                            | PQ UNIQUE | - |
| 126 | ENSDARP000000024741 | napba           | napba-201          | N-ethylmaleimide-sensitive factor attachment protein, beta a   | Protein degradation and synthesis inhibition | PQ UNIQUE | - |
| 127 | ENSDARP000000028134 | psma6b          | psma6b-001         | Proteasome (prosome, macropain) subunit, alpha type, 6b        | Protein degradation and synthesis inhibition | PQ UNIQUE | - |

|     |                    |                 |                    |                                                                                  |                                              |           |   |
|-----|--------------------|-----------------|--------------------|----------------------------------------------------------------------------------|----------------------------------------------|-----------|---|
| 128 | ENSDARP0000006106  | bcap31          | bcap31-001         | B-cell receptor-associated protein 31                                            | Protein Synthesis                            | PQ UNIQUE | - |
| 129 | ENSDARP00000108625 | bcap31          | bcap31-201         | B-cell receptor-associated protein 31                                            | Protein Synthesis                            | PQ UNIQUE | - |
| 130 | ENSDARP00000098086 | cfb             | cfb-201            | Complement factor B                                                              | Immune system related                        | PQ UNIQUE | - |
| 131 | ENSDARP00000060174 | si:dkey-12e7.4  | si:dkey-12e7.4-001 | Oxidoreductase-NAD(p) binding domain                                             | Lipid metabolism                             | PQ UNIQUE | - |
| 132 | ENSDARP00000112303 | psmb7           | psmb7-001          | Proteasome (prosome, macropain) subunit, beta type, 7                            | Protein degradation and synthesis inhibition | PQ UNIQUE | - |
| 133 | ENSDARP00000035106 | PURA (1 of 2)   | PURA (1 of 2)-201  | Purine-rich element binding protein A [                                          | Cell cycle, division, growth and fate        | PQ UNIQUE | - |
| 134 | ENSDARP00000059013 | zgc:173443      | zgc:173443-001     | Uncharacterized protein                                                          | Other                                        | PQ UNIQUE | - |
| 135 | ENSDARP00000055324 | psmb7           | psmb7-002          | Proteasome (prosome, macropain) subunit, beta type, 7                            | Protein degradation and synthesis inhibition | PQ UNIQUE | - |
| 136 | ENSDARP00000101909 | pura            | pura-002           | Purine-rich element binding protein A                                            | Protein Synthesis                            | PQ UNIQUE | - |
| 137 | ENSDARP00000112873 | snx12           | snx12-002          | Sorting nexin 12                                                                 | Endosome-Lysosome related                    | PQ UNIQUE | - |
| 138 | ENSDARP00000122416 | pura            | pura-001           | Purine-rich element binding protein A                                            | Protein Synthesis                            | PQ UNIQUE | - |
| 139 | ENSDARP00000088108 | NAPA (2 of 2)   | NAPA (2 of 2)-001  | N-ethylmaleimide-sensitive factor attachment protein, alpha                      | Endosome-Lysosome related                    | PQ UNIQUE | - |
| 140 | ENSDARP00000021426 | zgc:66479       | zgc:66479-001      | Uncharacterized protein                                                          | Other                                        | PQ UNIQUE | - |
| 141 | ENSDARP00000033064 | wdr61           | wdr61-201          | WD repeat domain 61                                                              | Cell cycle, division, growth and fate        | PQ UNIQUE | - |
| 142 | ENSDARP00000110861 | wdr61           | wdr61-202          | WD repeat domain 61                                                              | Cell cycle, division, growth and fate        | PQ UNIQUE | - |
| 143 | ENSDARP00000025772 | syap1           | syap1-001          | Synapse associated protein 1                                                     | Other                                        | PQ UNIQUE | - |
| 144 | ENSDARP00000026028 | hmgcl           | hmgcl-001          | 3-hydroxymethyl-3-methylglutaryl-Coenzyme A lyase                                | Lipid metabolism                             | PQ UNIQUE | - |
| 145 | ENSDARP00000104510 | hmgcl           | hmgcl-201          | 3-hydroxymethyl-3-methylglutaryl-Coenzyme A lyase                                | Lipid metabolism                             | PQ UNIQUE | - |
| 146 | ENSDARP00000129523 | glg1a           | glg1a-002          | Golgi glycoprotein 1a                                                            | Cell cycle, division, growth and fate        | PQ UNIQUE | - |
| 147 | ENSDARP00000045487 | ck2a2b          | ck2a2b-201         | Casein kinase 2 alpha 2b                                                         | Apoptosis related                            | PQ UNIQUE | - |
| 148 | ENSDARP00000103569 | act16b          | act16b-201         | Actin-like 6B                                                                    | Protein Synthesis                            | PQ UNIQUE | - |
| 149 | ENSDARP00000024096 | ACTR2 (1 of 3)  | ACTR2 (1 of 3)-001 | ARP2 actin-related protein 2 homolog (yeast)                                     | Oncogenes related                            | PQ UNIQUE | - |
| 150 | ENSDARP00000057868 | mat1a           | mat1a-001          | Methionine adenosyltransferase 1, alpha                                          | Protein Synthesis                            | PQ UNIQUE | - |
| 151 | ENSDARP00000124307 | act16b          | act16b-001         | Actin-like 6B                                                                    | Protein Synthesis                            | PQ UNIQUE | - |
| 152 | ENSDARP00000071166 | aars            | aars-201           | Alanyl-tRNA synthetase                                                           | Protein Synthesis                            | PQ UNIQUE | - |
| 153 | ENSDARP00000088880 | viml            | viml-201           | Vimentin like                                                                    | Cell cycle, division, growth and fate        | PQ UNIQUE | - |
| 154 | ENSDARP0000016261  | vim             | vim-001            | Vimentin                                                                         | Cell cycle, division, growth and fate        | PQ UNIQUE | - |
| 155 | ENSDARP00000023622 | bfb             | bfb-001            | Complement component bfb                                                         | Endosome-Lysosome related                    | PQ UNIQUE | - |
| 156 | ENSDARP00000107935 | bfb             | bfb-201            | Complement component bfb                                                         | Endosome-Lysosome related                    | PQ UNIQUE | - |
| 157 | ENSDARP00000113857 | coro1cb         | coro1cb-001        | Coronin, actin binding protein, 1Cb                                              | Endosome-Lysosome related                    | PQ UNIQUE | - |
| 158 | ENSDARP00000039795 | coro1cb         | coro1cb-201        | Coronin, actin binding protein, 1Cb                                              | Endosome-Lysosome related                    | PQ UNIQUE | - |
| 159 | ENSDARP00000091174 | aars            | aars-001           | Alanyl-tRNA synthetase                                                           | Protein Synthesis                            | PQ UNIQUE | - |
| 160 | ENSDARP0000012553  | aaas            | aaas-201           | Achalasia, adrenocortical insufficiency, alacrimia                               | Cell cycle, division, growth and fate        | PQ UNIQUE | - |
| 161 | ENSDARP00000110386 | aars            | aars-202           | Alanyl-tRNA synthetase                                                           | Protein Synthesis                            | PQ UNIQUE | - |
| 162 | ENSDARP00000120649 | aars            | aars-002           | Alanyl-tRNA synthetase                                                           | Protein Synthesis                            | PQ UNIQUE | - |
| 163 | ENSDARP00000105615 | CU695117.1      | CU695117.1-201     | Zinc finger MYM-type protein 1                                                   | Protein synthesis                            | PQ UNIQUE | - |
| 164 | ENSDARP00000109275 | CU929506.1      | CU929506.1-201     | Zinc finger MYM-type protein 1                                                   | Protein synthesis                            | PQ UNIQUE | - |
| 165 | ENSDARP00000074082 | C4B             | C4B-201            | Complement component 4B (Chido blood group)                                      | Immune system related                        | PQ UNIQUE | - |
| 166 | ENSDARP00000115743 | C4B             | C4B-001            | Complement component 4B (Chido blood group)                                      | Immune system related                        | PQ UNIQUE | - |
| 167 | ENSDARP0000000803  | actn3b          | actn3b-001         | Actinin alpha 3b                                                                 | Cell cycle, division, growth and fate        | PQ UNIQUE | - |
| 168 | ENSDARP00000005224 | actn3a          | actn3a-001         | Actinin alpha 3b                                                                 | Cell cycle, division, growth and fate        | PQ UNIQUE | - |
| 169 | ENSDARP00000090990 | actn1           | actn1-201          | Actinin, alpha 1                                                                 | Cell cycle, division, growth and fate        | PQ UNIQUE | - |
| 170 | ENSDARP00000110976 | actn1           | actn1-202          | Actinin, alpha 1                                                                 | Cell cycle, division, growth and fate        | PQ UNIQUE | - |
| 171 | ENSDARP00000120755 | actn1           | actn1-002          | Actinin, alpha 1                                                                 | Cell cycle, division, growth and fate        | PQ UNIQUE | - |
| 172 | ENSDARP00000123299 | actn1           | actn1-001          | Actinin, alpha 1                                                                 | Cell cycle, division, growth and fate        | PQ UNIQUE | - |
| 173 | ENSDARP00000077418 | clip2           | clip2-201          | CAP-GLY domain containing linker protein 2                                       | Cell cycle, division, growth and fate        | PQ UNIQUE | - |
| 174 | ENSDARP00000124509 | clip2           | clip2-001          | CAP-GLY domain containing linker protein 2                                       | Cell cycle, division, growth and fate        | PQ UNIQUE | - |
| 175 | ENSDARP00000109853 | hdlbbp          | hdlbbp-201         | High density lipoprotein-binding protein b                                       | Lipid metabolism                             | PQ UNIQUE | - |
| 176 | ENSDARP00000127252 | hdlbbp          | hdlbbp-001         | High density lipoprotein-binding protein b                                       | Lipid metabolism                             | PQ UNIQUE | - |
| 177 | ENSDARP00000052837 | acta1a          | acta1a-001         | Actin alpha 1a skeletal muscle                                                   | Cell cycle, division, growth and fate        | PQ UNIQUE | - |
| 178 | ENSDARP00000055135 | actc1b          | actc1b-201         | Actin, alpha, cardiac muscle 1b                                                  | Cell cycle, division, growth and fate        | PQ UNIQUE | - |
| 179 | ENSDARP00000055379 | tubb5           | tubb5-201          | Tubulin, beta 5                                                                  | Cell cycle, division, growth and fate        | PQ UNIQUE | - |
| 180 | ENSDARP00000058628 | acta1b          | acta1b-001         | Actin, alpha 1b, skeletal muscle                                                 | Cell cycle, division, growth and fate        | PQ UNIQUE | - |
| 181 | ENSDARP00000062369 | actc1a          | actc1a-001         | Actin, alpha, cardiac muscle 1a                                                  | Cell cycle, division, growth and fate        | PQ UNIQUE | - |
| 182 | ENSDARP00000063082 | zgc:174637      | zgc:174637-201     | Arylesterase activity                                                            | Immune system related                        | PQ UNIQUE | - |
| 183 | ENSDARP00000066429 | acta2           | acta2-201          | Actin, alpha 2, smooth muscle, aorta                                             | Cell cycle, division, growth and fate        | PQ UNIQUE | - |
| 184 | ENSDARP00000066858 | tubb4b          | tubb4b-001         | Tubulin, beta 4B class IVb                                                       | Cell cycle, division, growth and fate        | PQ UNIQUE | - |
| 185 | ENSDARP00000069926 | PPP2CA          | PPP2CA-201         | Protein phosphatase 2, catalytic subunit, alpha isozyme                          | Protein Synthesis                            | PQ UNIQUE | - |
| 186 | ENSDARP00000074935 | ywhag1          | ywhag1-001         | 3-monoxygenase/tryptophan 5-monoxygenase activation protein, gamma polypeptide 1 | Cell cycle, division, growth and fate        | PQ UNIQUE | - |
| 187 | ENSDARP00000075110 | CH211-260D9.2   | CH211-260D9.2-001  | Actin-novel                                                                      | Cell cycle, division, growth and fate        | PQ UNIQUE | - |
| 188 | ENSDARP00000095894 | si:dkey-90i23.2 | Novel              | L-rhamnose-binding lectin CSL3-like isoform X2                                   | Lectins                                      | PQ UNIQUE | - |
| 189 | ENSDARP00000096898 | ywhag2          | ywhag2-001         | 3-monoxygenase/tryptophan 5-monoxygenase activation protein, gamma polypeptide 2 | Cell cycle, division, growth and fate        | PQ UNIQUE | - |
| 190 | ENSDARP00000100195 | zgc:86725       | zgc:86725          | Actin alpha 1 (ACTA1)-like                                                       | Cell cycle, division, growth and fate        | PQ UNIQUE | - |
| 191 | ENSDARP00000100434 | actc1a          | Novel              | Actin, alpha, cardiac muscle 1a, novel                                           | Cell cycle, division, growth and fate        | PQ UNIQUE | - |
| 192 | ENSDARP00000102472 | vtg4            | vtg4-202           | Vitellogenin 4                                                                   | Vitellogenins                                | PQ UNIQUE | - |
| 193 | ENSDARP00000103251 | qdrpb2          | qdrpb2-201         | Quinoid dihydropteridine reductase b2                                            | REDOX/Detox related                          | PQ UNIQUE | - |
| 194 | ENSDARP00000104702 | qdrpb2          | qdrpb2-001         | Quinoid dihydropteridine reductase b2                                            | REDOX/Detox related                          | PQ UNIQUE | - |
| 195 | ENSDARP00000105815 | zgc:173556      | zgc:173556-001     | Zona pellucida glycoprotein 3.1                                                  | Zona Pellucida proteins                      | PQ UNIQUE | - |

|     |                    |                  |                      |                                                                                 |                                              |              |       |
|-----|--------------------|------------------|----------------------|---------------------------------------------------------------------------------|----------------------------------------------|--------------|-------|
| 196 | ENSDARP00000106988 | si:dkeyp-98a7.5  | si:dkeyp-98a7.5-202  | Novel rhamnose binding lectin-like precursor                                    | Lectins                                      | PQ UNIQUE    | -     |
| 197 | ENSDARP00000107122 | tubb4b           | tubb4b-201           | Tubulin, beta 4B class IVb                                                      | Cell cycle, division, growth and fate        | PQ UNIQUE    | -     |
| 198 | ENSDARP00000107578 | si:dkeyp-98a7.4  | si:dkeyp-98a7.4-201  | SUEL type lectin domain                                                         | Lectins                                      | PQ UNIQUE    | -     |
| 199 | ENSDARP00000109226 | AL929192.2       | AL929192.2-201       | Gal lectin superfamily                                                          | Lectins                                      | PQ UNIQUE    | -     |
| 200 | ENSDARP00000110519 | AL929192.1       | AL929192.1-201       | Gal lectin superfamily                                                          | Lectins                                      | PQ UNIQUE    | -     |
| 201 | ENSDARP00000111434 | si:dkeyp-98a7.5  | si:dkeyp-98a7.5-201  | SUEL type lectin domain                                                         | Lectins                                      | PQ UNIQUE    | -     |
| 202 | ENSDARP00000111784 | si:dkeyp-98a7.3  | si:dkeyp-98a7.3-201  | SUEL type lectin domain                                                         | Lectins                                      | PQ UNIQUE    | -     |
| 203 | ENSDARP00000120702 | si:dkeyp-98a7.5  | si:dkeyp-98a7.5-001  | SUEL type lectin domain                                                         | Lectins                                      | PQ UNIQUE    | -     |
| 204 | ENSDARP00000124371 | acta2            | acta2-001            | Actin, alpha 2, smooth muscle, aorta                                            | Cell cycle, division, growth and fate        | PQ UNIQUE    | -     |
| 205 | ENSDARP00000125193 | si:dkeyp-98a7.7  | si:dkeyp-98a7.7-001  | SUEL type lectin domain                                                         | Lectins                                      | PQ UNIQUE    | -     |
| 206 | ENSDARP00000125214 | si:dkeyp-98a7.8  | si:dkeyp-98a7.8-001  | SUEL type lectin domain                                                         | Lectins                                      | PQ UNIQUE    | -     |
| 207 | ENSDARP00000125238 | si:dkeyp-98a7.4  | si:dkeyp-98a7.4-001  | SUEL type lectin domain                                                         | Lectins                                      | PQ UNIQUE    | -     |
| 208 | ENSDARP00000125244 | si:dkeyp-98a7.3  | si:dkeyp-98a7.3-001  | SUEL type lectin domain                                                         | Lectins                                      | PQ UNIQUE    | -     |
| 209 | ENSDARP00000125496 | si:ch211-250e5.9 | si:ch211-250e5.9-001 | SUEL type lectin domain                                                         | Lectins                                      | PQ UNIQUE    | -     |
| 210 | ENSDARP00000125818 | PPP2CA           | PPP2CA-001           | Protein phosphatase 2, catalytic subunit, alpha isozyme                         | Protein Synthesis                            | PQ UNIQUE    | -     |
| 211 | ENSDARP00000126883 | ACTC1 (2 of 2)   | ACTC1 (2 of 2)-001   | Actin, alpha, cardiac muscle 1a                                                 | Cell cycle, division, growth and fate        | PQ UNIQUE    | -     |
| 212 | ENSDARP00000094165 | wu:fl42e03       | wu:fl42e03-201       | PAX-interacting protein 1                                                       | Cell cycle, division, growth and fate        | PQ INCREASED | 27.99 |
| 213 | ENSDARP00000091393 | ZP2 (2 of 4)     | ZP2 (2 of 4)-001     | Zona pellucida glycoprotein 2 (sperm receptor)                                  | Zona Pellucida proteins                      | PQ INCREASED | 12.17 |
| 214 | ENSDARP00000116912 | zgc:173856       | zgc:173856-001       | Nuclear receptor coactivator 6-like                                             | Protein Synthesis                            | PQ INCREASED | 11.43 |
| 215 | ENSDARP00000072211 | zp2l1            | zp2l1-001            | Zona pellucida glycoprotein 2, like 1                                           | Zona Pellucida proteins                      | PQ INCREASED | 10.63 |
| 216 | ENSDARP00000107576 | sudc2            | sudc2-201            | Succinate-CoA ligase, GDP-forming, beta subunit                                 | Energy metabolism                            | PQ INCREASED | 9.58  |
| 217 | ENSDARP00000068662 | zp3.2            | zp3.2-202            | Zona pellucida glycoprotein 3, tandem duplicate 2                               | Zona Pellucida proteins                      | PQ INCREASED | 9.13  |
| 218 | ENSDARP00000122970 | zp3b             | zp3b-002             | Zona pellucida glycoprotein 3b                                                  | Zona Pellucida proteins                      | PQ INCREASED | 8.85  |
| 219 | ENSDARP00000081954 | sudc2            | sudc2-001            | Succinate-CoA ligase, GDP-forming, beta subunit                                 | Energy metabolism                            | PQ INCREASED | 8.74  |
| 220 | ENSDARP00000071171 | zp3b             | zp3b-201             | Zona pellucida glycoprotein 3b                                                  | Zona Pellucida proteins                      | PQ INCREASED | 7.40  |
| 221 | ENSDARP00000071703 | alg1             | alg1-001             | Asparagine-linked glycosylation 1 homolog (yeast, beta-1,4-mannosyltransferase) | Protein Synthesis                            | PQ INCREASED | 6.96  |
| 222 | ENSDARP00000099884 | ZP2 (3 of 4)     | ZP2 (3 of 4)-201     | Zona pellucida glycoprotein 2 (sperm receptor)                                  | Zona Pellucida proteins                      | PQ INCREASED | 6.54  |
| 223 | ENSDARP00000058255 | zp3b             | zp3b-001             | Zona pellucida glycoprotein 3b                                                  | Zona Pellucida proteins                      | PQ INCREASED | 6.53  |
| 224 | ENSDARP00000054229 | fgg              | fgg-001              | Fibrinogen, gamma polypeptide                                                   | Immune system related                        | PQ INCREASED | 6.11  |
| 225 | ENSDARP00000088788 | ERLIN2           | ERLIN2-201           | ER lipid raft associated 2 (erlin2), mRNA                                       | Lipid metabolism                             | PQ INCREASED | 6.10  |
| 226 | ENSDARP00000121177 | ERLIN2           | ERLIN2-001           | ER lipid raft associated 2 (erlin2), mRNA                                       | Lipid metabolism                             | PQ INCREASED | 6.10  |
| 227 | ENSDARP00000124617 | rpa2             | rpa2-002             | Replication protein A2                                                          | Cell cycle, division, growth and fate        | PQ INCREASED | 5.24  |
| 228 | ENSDARP00000094808 | sdf4             | sdf4-001             | Stromal cell derived factor 4                                                   | Immune system related                        | PQ INCREASED | 5.22  |
| 229 | ENSDARP00000122503 | pus1             | pus1-001             | Pseudouridine synthase 1                                                        | Cell cycle, division, growth and fate        | PQ INCREASED | 5.22  |
| 230 | ENSDARP00000121591 | CRP              | CRP-001              | C-reactive protein, pentraxin-related                                           | Immune system related                        | PQ INCREASED | 5.22  |
| 231 | ENSDARP00000054025 | rcc1             | rcc1-001             | Regulator of chromosome condensation 1                                          | Cell cycle, division, growth and fate        | PQ INCREASED | 5.20  |
| 232 | ENSDARP00000127355 | capgb            | capgb-001            | Capping protein (actin filament), gelsolin-like b                               | Cell cycle, division, growth and fate        | PQ INCREASED | 4.37  |
| 233 | ENSDARP00000036766 | zgc:165539       | zgc:165539-201       | Uncharacterized protein                                                         | Cell cycle, division, growth and fate        | PQ INCREASED | 4.36  |
| 234 | ENSDARP00000029607 | gfap             | gfap-001             | Glial fibrillary acidic protein                                                 | Cell cycle, division, growth and fate        | PQ INCREASED | 4.35  |
| 235 | ENSDARP00000116942 | zgc:165539       | zgc:165539-001       | Uncharacterized protein                                                         | Cell cycle, division, growth and fate        | PQ INCREASED | 4.35  |
| 236 | ENSDARP00000107173 | si:dkey-24117.5  | si:dkey-24117.5-001  | C type lectin                                                                   | Lectins                                      | PQ INCREASED | 4.32  |
| 237 | ENSDARP00000109765 | zgc:171670       | zgc:171670-001       | C type lectin                                                                   | Lectins                                      | PQ INCREASED | 4.32  |
| 238 | ENSDARP00000127261 | zgc:171670       | zgc:171670-002       | C type lectin                                                                   | Lectins                                      | PQ INCREASED | 4.32  |
| 239 | ENSDARP00000127453 | si:dkey-24117.5  | si:dkey-24117.5-002  | C type lectin                                                                   | Lectins                                      | PQ INCREASED | 4.32  |
| 240 | ENSDARP00000018923 | eif4a1b          | eif4a1b-001          | Eukaryotic translation initiation factor 4A, isoform 1B                         | Protein Synthesis                            | PQ INCREASED | 4.04  |
| 241 | ENSDARP00000128336 | eif4a3           | eif4a3-002           | Eukaryotic translation initiation factor 4A, isoform 1B                         | Protein Synthesis                            | PQ INCREASED | 4.01  |
| 242 | ENSDARP00000061750 | zp3a.2           | zp3a.2-001           | Zona pellucida glycoprotein 3a, tandem duplicate 2                              | Zona Pellucida proteins                      | PQ INCREASED | 3.98  |
| 243 | ENSDARP00000004016 | fen1             | fen1-201             | Flap structure-specific endonuclease 1                                          | Cell cycle, division, growth and fate        | PQ INCREASED | 3.91  |
| 244 | ENSDARP00000043687 | si:dkey-24117.2  | si:dkey-24117.2-001  | C type lectin                                                                   | Lectins                                      | PQ INCREASED | 3.84  |
| 245 | ENSDARP00000127204 | si:dkey-24117.2  | si:dkey-24117.2-002  | C type lectin                                                                   | Lectins                                      | PQ INCREASED | 3.84  |
| 246 | ENSDARP00000127328 | si:dkey-24117.2  | si:dkey-24117.2-003  | C type lectin                                                                   | Lectins                                      | PQ INCREASED | 3.84  |
| 247 | ENSDARP00000104065 | zgc:173837       | zgc:173837-201       | Uncharacterized dopey family member 2-like protein                              | Endosome-Lysosome related                    | PQ INCREASED | 3.80  |
| 248 | ENSDARP00000070941 | ap2a1            | ap2a1-201            | Adaptor-related protein complex 2, alpha 1 subunit                              | Protein degradation and synthesis inhibition | PQ INCREASED | 3.53  |
| 249 | ENSDARP00000105782 | mat2aa           | mat2aa-001           | S-adenosylmethionine synthase-Methionine adenosyltransferase II, alpha a        | Protein Synthesis                            | PQ INCREASED | 3.50  |
| 250 | ENSDARP00000028571 | ndufs1           | ndufs1-001           | NADH dehydrogenase (ubiquinone) Fe-S protein 1                                  | Energy metabolism                            | PQ INCREASED | 3.49  |
| 251 | ENSDARP00000118532 | erlin2           | erlin2-001           | ER lipid raft associated 2 (erlin2), mRNA                                       | Lipid metabolism                             | PQ INCREASED | 3.49  |
| 252 | ENSDARP00000110335 | isoc1            | isoc1-201            | Isochorismatase domain containing 1                                             | REDOX/Detox related                          | PQ INCREASED | 3.49  |
| 253 | ENSDARP00000063856 | scrm2            | scrm2-001            | Secernin 2                                                                      | Protein degradation and synthesis inhibition | PQ INCREASED | 3.49  |
| 254 | ENSDARP00000114795 | casp3a           | casp3a-003           | Caspase 3, apoptosis-related cysteine protease a                                | Apoptosis related                            | PQ INCREASED | 3.49  |
| 255 | ENSDARP00000110330 | HOMER2           | HOMER2-201           | Homer homolog 2 (Drosophila)                                                    | Other                                        | PQ INCREASED | 3.48  |
| 256 | ENSDARP00000116562 | sepp1a           | sepp1a-001           | Selenoprotein P, plasma, 1a                                                     | REDOX/Detox related                          | PQ INCREASED | 3.48  |
| 257 | ENSDARP00000090521 | nap14b           | nap14b-201           | Nucleosome assembly protein 1-like 4b                                           | Cell cycle, division, growth and fate        | PQ INCREASED | 3.48  |
| 258 | ENSDARP00000115833 | nap14b           | nap14b-001           | Nucleosome assembly protein 1-like 4b                                           | Cell cycle, division, growth and fate        | PQ INCREASED | 3.48  |
| 259 | ENSDARP00000076885 | HOMER2           | HOMER2-202           | Homer homolog 2 (Drosophila)                                                    | Other                                        | PQ INCREASED | 3.48  |
| 260 | ENSDARP00000057824 | cfd              | cfd-001              | Complement factor D (adipsin)                                                   | Protein degradation and synthesis inhibition | PQ INCREASED | 3.48  |
| 261 | ENSDARP00000034563 | fntb             | fntb-001             | Farnesyltransferase, CAAX box, beta                                             | Cell cycle, division, growth and fate        | PQ INCREASED | 3.48  |
| 262 | ENSDARP00000025160 | psmd8            | psmd8-001            | Proteasome (prosome, macropain) 26S subunit, non-ATPase, 8                      | Protein Synthesis                            | PQ INCREASED | 3.48  |
| 263 | ENSDARP00000078713 | isoc1            | isoc1-001            | Isochorismatase domain containing 1                                             | REDOX/Detox related                          | PQ INCREASED | 3.47  |

|     |                    |                  |                      |                                                                                               |                                              |              |      |
|-----|--------------------|------------------|----------------------|-----------------------------------------------------------------------------------------------|----------------------------------------------|--------------|------|
| 264 | ENSDARP0000060245  | dnajc3           | dnajc3-001           | DnaJ (Hsp40) homolog, subfamily C, member 3                                                   | Protein Synthesis                            | PQ INCREASED | 3.47 |
| 265 | ENSDARP00000128168 | ap2a1            | ap2a1-001            | Adaptor-related protein complex 2, alpha 1 subunit                                            | Protein degradation and synthesis inhibition | PQ INCREASED | 3.44 |
| 266 | ENSDARP00000073542 | CR559930.2       | CR559930.2-201       | Serpin superfamily                                                                            | Other                                        | PQ INCREASED | 3.40 |
| 267 | ENSDARP00000095519 | zgc.171927       | zgc.171927-001       | Uncharacterized protein                                                                       | Apoptosis related                            | PQ INCREASED | 3.35 |
| 268 | ENSDARP00000100922 | CABZ01059627.2   | CABZ01059627.2-202   | Mucin-5AC                                                                                     | Cell cycle, division, growth and fate        | PQ INCREASED | 3.35 |
| 269 | ENSDARP00000107790 | zp3a.1           | zp3a.1-201           | Zona pellucida glycoprotein 3a, tandem duplicate 1                                            | Zona Pellucida proteins                      | PQ INCREASED | 3.34 |
| 270 | ENSDARP00000103071 | zgc.173770       | zgc.173770-201       | Mucin-5AC-like                                                                                | Cell cycle, division, growth and fate        | PQ INCREASED | 3.31 |
| 271 | ENSDARP00000118880 | rplp1            | rplp1-002            | Ribosomal protein, large, P1                                                                  | Protein Synthesis                            | PQ INCREASED | 3.14 |
| 272 | ENSDARP00000027643 | zgc.63587        | zgc.63587-201        | Uncharacterized protein                                                                       | Cell cycle, division, growth and fate        | PQ INCREASED | 3.10 |
| 273 | ENSDARP00000058955 | ywhabl           | ywhabl-001           | Tyrosine 3-monooxygenase/tryptophan 5-monooxygenase activation protein, beta polypeptide like | Cell cycle, division, growth and fate        | PQ INCREASED | 3.08 |
| 274 | ENSDARP00000103720 | ywhabl           | ywhabl-201           | Tyrosine 3-monooxygenase/tryptophan 5-monooxygenase activation protein, beta polypeptide like | Cell cycle, division, growth and fate        | PQ INCREASED | 3.08 |
| 275 | ENSDARP00000060688 | eif2b2           | eif2b2-001           | Eukaryotic translation initiation factor 2B, subunit 2 beta                                   | Protein Synthesis                            | PQ INCREASED | 3.05 |
| 276 | ENSDARP00000096076 | si:ch211-226h8.6 | si:ch211-226h8.6-001 | Uncharacterized protein                                                                       | Other                                        | PQ INCREASED | 3.05 |
| 277 | ENSDARP00000122128 | si:ch211-11k18.4 | si:ch211-11k18.4-002 | Uncharacterized protein                                                                       | Other                                        | PQ INCREASED | 3.05 |
| 278 | ENSDARP00000011707 | uqcrf1           | uqcrf1-001           | Ubiquinol-cytochrome c reductase, Rieske iron-sulfur polypeptide 1                            | Energy metabolism                            | PQ INCREASED | 3.05 |
| 279 | ENSDARP00000099928 | uqcrf1           | uqcrf1-201           | Ubiquinol-cytochrome c reductase, Rieske iron-sulfur polypeptide 1                            | Energy metabolism                            | PQ INCREASED | 3.05 |
| 280 | ENSDARP00000103915 | c9               | c9-202               | Complement component 9                                                                        | Immune system related                        | PQ INCREASED | 2.95 |
| 281 | ENSDARP00000121323 | c9               | c9-001               | Complement component 9                                                                        | Immune system related                        | PQ INCREASED | 2.95 |
| 282 | ENSDARP00000128894 | thop1            | thop1-002            | Thimet oligopeptidase 1                                                                       | Protein degradation and synthesis inhibition | PQ INCREASED | 2.91 |
| 283 | ENSDARP00000051373 | c9               | c9-201               | Complement component 9                                                                        | Immune system related                        | PQ INCREASED | 2.90 |
| 284 | ENSDARP00000109027 | cdk1             | cdk1-001             | Cyclin-dependent kinase 1                                                                     | Cell cycle, division, growth and fate        | PQ INCREASED | 2.90 |
| 285 | ENSDARP00000054077 | rpa2             | rpa2-001             | Replication protein A2                                                                        | Cell cycle, division, growth and fate        | PQ INCREASED | 2.90 |
| 286 | ENSDARP00000058424 | CABZ01059627.1   | CABZ01059627.1-201   | Mucin 5Ac                                                                                     | Cell cycle, division, growth and fate        | PQ INCREASED | 2.87 |
| 287 | ENSDARP00000069494 | eif2s2           | eif2s2-001           | Translation initiation factor 2 subunit 2                                                     | Protein Synthesis                            | PQ INCREASED | 2.74 |
| 288 | ENSDARP00000065372 | eef1b2           | eef1b2-001           | Elongation factor 1-beta                                                                      | Protein Synthesis                            | PQ INCREASED | 2.72 |
| 289 | ENSDARP00000009441 | pcid2            | pcid2.001            | PCI domain containing 2                                                                       | Immune system related                        | PQ INCREASED | 2.62 |
| 290 | ENSDARP00000116670 | nap114b          | nap114b-002          | Nucleosome assembly protein 1-like 4b                                                         | Cell cycle, division, growth and fate        | PQ INCREASED | 2.62 |
| 291 | ENSDARP00000096322 | arl3             | arl3-001             | ADP-ribosylation factor-like 3                                                                | Cell cycle, division, growth and fate        | PQ INCREASED | 2.62 |
| 292 | ENSDARP00000095451 | tpd52i2b         | tpd52i2b-002         | Tumor protein D52-like 2b                                                                     | Oncogenes related                            | PQ INCREASED | 2.62 |
| 293 | ENSDARP00000022360 | anp32a           | anp32a-001           | Acidic (leucine-rich) nuclear phosphoprotein 32 family, member A                              | Cell cycle, division, growth and fate        | PQ INCREASED | 2.62 |
| 294 | ENSDARP00000123639 | lcn2l            | lcn2l-003            | Transcobalamin II                                                                             | Other                                        | PQ INCREASED | 2.62 |
| 295 | ENSDARP00000112902 | srsf1b           | srsf1b-002           | Serine/arginine-rich splicing factor 1b                                                       | Protein Synthesis                            | PQ INCREASED | 2.62 |
| 296 | ENSDARP00000120687 | actr2b           | actr2b-002           | Actin-related protein 2b homolog                                                              | Cell cycle, division, growth and fate        | PQ INCREASED | 2.62 |
| 297 | ENSDARP00000107467 | snrpa1           | snrpa1-002           | Small nuclear ribonucleoprotein polypeptide A                                                 | Protein Synthesis                            | PQ INCREASED | 2.62 |
| 298 | ENSDARP00000116615 | anp32a           | anp32a-002           | Acidic (leucine-rich) nuclear phosphoprotein 32 family, member A                              | Cell cycle, division, growth and fate        | PQ INCREASED | 2.62 |
| 299 | ENSDARP00000015887 | skp1             | skp1-001             | S-phase kinase-associated protein 1                                                           | Protein degradation and synthesis inhibition | PQ INCREASED | 2.62 |
| 300 | ENSDARP00000115511 | tpd52i2b         | tpd52i2b-004         | Tumor protein D52-like 2b                                                                     | Oncogenes related                            | PQ INCREASED | 2.62 |
| 301 | ENSDARP00000060303 | dhrs13a.3        | dhrs13a.3-001        | Dehydrogenase/reductase (SDR family) member 13a, duplicate 3                                  | REDOX/Detox related                          | PQ INCREASED | 2.62 |
| 302 | ENSDARP00000127050 | nup43            | nup43-003            | Nucleoporin 43                                                                                | Protein Synthesis                            | PQ INCREASED | 2.62 |
| 303 | ENSDARP00000117901 | tpd52i2b         | tpd52i2b-006         | Tumor protein D52-like 2b                                                                     | Oncogenes related                            | PQ INCREASED | 2.62 |
| 304 | ENSDARP00000105248 | ist1             | ist1-201             | Increased sodium tolerance 1 homolog (yeast)                                                  | Protein degradation and synthesis inhibition | PQ INCREASED | 2.62 |
| 305 | ENSDARP00000116690 | pus1             | pus1-002             | Pseudouridylylase 1                                                                           | Protein Synthesis                            | PQ INCREASED | 2.61 |
| 306 | ENSDARP00000116432 | slc25a5          | slc25a5-003          | Solute carrier family 25 (mitochondrial carrier, adenine nucleotide translocator), member 5   | Other                                        | PQ INCREASED | 2.61 |
| 307 | ENSDARP00000059040 | h1m              | h1m-201              | Linker histone 1M                                                                             | Cell cycle, division, growth and fate        | PQ INCREASED | 2.61 |
| 308 | ENSDARP00000104211 | myl9b            | myl9b-201            | Myosin, light chain 9b, regulatory                                                            | Cell cycle, division, growth and fate        | PQ INCREASED | 2.61 |
| 309 | ENSDARP00000121790 | tpd52i2b         | tpd52i2b-008         | Tumor protein D52-like 2b                                                                     | Oncogenes related                            | PQ INCREASED | 2.61 |
| 310 | ENSDARP00000094070 | ndufa5           | ndufa5-001           | NADH dehydrogenase (ubiquinone) 1 alpha subcomplex subunit 5                                  | Energy metabolism                            | PQ INCREASED | 2.61 |
| 311 | ENSDARP00000023772 | marcksb          | marcksb-001          | Myristoylated alanine-rich C-kinase substrate                                                 | Apoptosis related                            | PQ INCREASED | 2.61 |
| 312 | ENSDARP00000066545 | nif31            | nif31-001            | NIF3 NGG1 interacting factor 3-like 1                                                         | Other                                        | PQ INCREASED | 2.61 |
| 313 | ENSDARP00000117802 | tpd52i2b         | tpd52i2b-009         | Tumor protein D52-like 2b                                                                     | Oncogenes related                            | PQ INCREASED | 2.61 |
| 314 | ENSDARP00000116734 | ist1             | ist1-002             | Increased sodium tolerance 1 homolog (yeast)                                                  | Protein degradation and synthesis inhibition | PQ INCREASED | 2.61 |
| 315 | ENSDARP00000117716 | casp3a           | casp3a-002           | Aspase 3, apoptosis-related cysteine peptidase a                                              | Apoptosis related                            | PQ INCREASED | 2.61 |
| 316 | ENSDARP00000068086 | ist1             | ist1-001             | Increased sodium tolerance 1 homolog (yeast)                                                  | Protein degradation and synthesis inhibition | PQ INCREASED | 2.61 |
| 317 | ENSDARP00000067511 | psma4            | psma4-001            | Proteasome (prosome, macropain) subunit, alpha type, 4                                        | Protein degradation and synthesis inhibition | PQ INCREASED | 2.61 |
| 318 | ENSDARP00000025342 | cox5aa           | cox5aa-201           | Cytochrome c oxidase subunit 5a                                                               | Energy metabolism                            | PQ INCREASED | 2.61 |
| 319 | ENSDARP00000105687 | cox5aa           | cox5aa-203           | Cytochrome c oxidase subunit 5a                                                               | Energy metabolism                            | PQ INCREASED | 2.61 |
| 320 | ENSDARP00000106612 | cox5aa           | cox5aa-202           | Cytochrome c oxidase subunit 5a                                                               | Energy metabolism                            | PQ INCREASED | 2.61 |
| 321 | ENSDARP00000123538 | cox5aa           | cox5aa-001           | Cytochrome c oxidase subunit 5a                                                               | Energy metabolism                            | PQ INCREASED | 2.61 |
| 322 | ENSDARP00000051185 | ncgrp1           | ncgrp1-001           | Non-specific cytotoxic cell receptor protein 1 homolog (zebrafish)                            | Immune system related                        | PQ INCREASED | 2.61 |
| 323 | ENSDARP00000073363 | fdx1             | fdx1-005             | Ferredoxin 1                                                                                  | REDOX/Detox related                          | PQ INCREASED | 2.61 |
| 324 | ENSDARP00000113657 | fdx1             | fdx1-002             | Ferredoxin 1                                                                                  | REDOX/Detox related                          | PQ INCREASED | 2.61 |
| 325 | ENSDARP00000124949 | fdx1             | fdx1-004             | Ferredoxin 1                                                                                  | REDOX/Detox related                          | PQ INCREASED | 2.61 |
| 326 | ENSDARP00000064438 | nup43            | nup43-001            | Nucleoporin 43                                                                                | Protein Synthesis                            | PQ INCREASED | 2.61 |
| 327 | ENSDARP00000069298 | si:ch73-207h17.1 | si:ch73-207h17.1-201 | Uncharacterized protein                                                                       | Other                                        | PQ INCREASED | 2.61 |
| 328 | ENSDARP00000121841 | tpd52i2b         | tpd52i2b-007         | Tumor protein D52-like 2b                                                                     | Oncogenes related                            | PQ INCREASED | 2.61 |
| 329 | ENSDARP00000003222 | cyp20a1          | cyp20a1-001          | Cytochrome P450, family 20, subfamily A, polypeptide 1                                        | REDOX/Detox related                          | PQ INCREASED | 2.61 |
| 330 | ENSDARP00000097644 | anp32a           | anp32a-201           | Anp32a-001                                                                                    | Cell cycle, division, growth and fate        | PQ INCREASED | 2.61 |
| 331 | ENSDARP00000129796 | ap2a1            | ap2a1-003            | Adaptor-related protein complex 2, alpha 1 subunit                                            | Protein degradation and synthesis inhibition | PQ INCREASED | 2.61 |

|     |                     |                  |                      |                                                                                       |                                              |              |      |
|-----|---------------------|------------------|----------------------|---------------------------------------------------------------------------------------|----------------------------------------------|--------------|------|
| 332 | ENSDARP00000051197  | mis18a           | mis18a-001           | MIS18 kinetochore protein A                                                           | Cell cycle, division, growth and fate        | PQ INCREASED | 2.61 |
| 333 | ENSDARP00000003173  | seh1l            | seh1l-001            | Nucleoporin SEH1                                                                      | Cell cycle, division, growth and fate        | PQ INCREASED | 2.61 |
| 334 | ENSDARP00000040239  | tipr1            | tipr1-201            | TIP41, TOR signaling pathway regulator-like (S. cerevisiae)                           | Cell cycle, division, growth and fate        | PQ INCREASED | 2.61 |
| 335 | ENSDARP000000023199 | tpo522b          | tpo522b-001          | Tumor protein D52-like 2b                                                             | Oncogenes related                            | PQ INCREASED | 2.61 |
| 336 | ENSDARP00000104624  | tpo522b          | tpo522b-201          | Tumor protein D52-like 2b                                                             | Oncogenes related                            | PQ INCREASED | 2.61 |
| 337 | ENSDARP00000044564  | zgc.63637        | zgc.63637-001        | RAB41, member RAS oncogene family [                                                   | Oncogenes related                            | PQ INCREASED | 2.60 |
| 338 | ENSDARP00000110405  | zgc.63637        | zgc.63637-201        | RAB41, member RAS oncogene family [                                                   | Oncogenes related                            | PQ INCREASED | 2.60 |
| 339 | ENSDARP00000095078  | actl6a           | actl6a-001           | Actin-like 6A                                                                         | Cell cycle, division, growth and fate        | PQ INCREASED | 2.60 |
| 340 | ENSDARP00000015934  | rragd            | rragd-001            | Ras-related GTP binding D                                                             | Apoptosis related                            | PQ INCREASED | 2.60 |
| 341 | ENSDARP00000044837  | ndrg1a           | ndrg1a-001           | N-myc downstream regulated 1a                                                         | Cell cycle, division, growth and fate        | PQ INCREASED | 2.49 |
| 342 | ENSDARP00000027276  | eif4a3           | eif4a3-001           | Eukaryotic translation initiation factor 4A3                                          | Protein Synthesis                            | PQ INCREASED | 2.43 |
| 343 | ENSDARP00000039951  | ldh3a            | ldh3a-201            | Isocitrate dehydrogenase 3 (NAD+) alpha                                               | Energy metabolism                            | PQ INCREASED | 2.40 |
| 344 | ENSDARP00000105892  | ddost            | ddost-001            | Dolichyl-diphosphooligosaccharide--protein glycosyltransferase subunit (non-catalytic | Protein Synthesis                            | PQ INCREASED | 2.39 |
| 345 | ENSDARP00000121212  | myl6             | myl6-004             | Myosin light chain 6                                                                  | Cell cycle, division, growth and fate        | PQ INCREASED | 2.37 |
| 346 | ENSDARP00000033600  | rplp1            | rplp1-001            | Ribosomal protein, large, P1                                                          | Protein Synthesis                            | PQ INCREASED | 2.36 |
| 347 | ENSDARP00000075666  | krt5             | krt5-201             | Keratin 5                                                                             | Cell cycle, division, growth and fate        | PQ INCREASED | 2.33 |
| 348 | ENSDARP00000079733  | l2ghdh           | l2ghdh-001           | L-2-hydroxyglutarate dehydrogenase [                                                  | REDOX/DeTox related                          | PQ INCREASED | 2.33 |
| 349 | ENSDARP000000092718 | rragca           | rragca-001           | Ras-related GTP binding Ca                                                            | Cell cycle, division, growth and fate        | PQ INCREASED | 2.32 |
| 350 | ENSDARP00000107677  | ppid             | ppid-201             | Peptidylprolyl isomerase D                                                            | Protein Synthesis                            | PQ INCREASED | 2.32 |
| 351 | ENSDARP00000108711  | krt5             | krt5-001             | Keratin 5                                                                             | Cell cycle, division, growth and fate        | PQ INCREASED | 2.32 |
| 352 | ENSDARP00000016453  | krt4             | krt4-001             | Keratin 4                                                                             | Cell cycle, division, growth and fate        | PQ INCREASED | 2.32 |
| 353 | ENSDARP00000006530  | krt4             | krt4-201             | Keratin 4                                                                             | Cell cycle, division, growth and fate        | PQ INCREASED | 2.32 |
| 354 | ENSDARP00000126991  | nif3l1           | nif3l1-002           | NIF3 NGG1 interacting factor 3-like 1                                                 | Other                                        | PQ INCREASED | 2.32 |
| 355 | ENSDARP00000061743  | zp3a.1           | zp3a.1-001           | zona pellucida glycoprotein 3a, tandem duplicate 1                                    | Zona Pellucida proteins                      | PQ INCREASED | 2.27 |
| 356 | ENSDARP00000103385  | ppp4cb           | ppp4cb-001           | Protein phosphatase 4, catalytic subunit b                                            | Protein degradation and synthesis inhibition | PQ INCREASED | 2.23 |
| 357 | ENSDARP00000093277  | anp32b           | anp32b-001           | Acidic (leucine-rich) nuclear phosphoprotein 32 family, member B                      | Cell cycle, division, growth and fate        | PQ INCREASED | 2.18 |
| 358 | ENSDARP00000055503  | cyc1             | cyc1-001             | Ubiquinol-cytochrome c reductase cytochrome c1 subunit                                | Energy metabolism                            | PQ INCREASED | 2.18 |
| 359 | ENSDARP00000075074  | arpc3            | arpc3-001            | Actin related protein 2/3 complex, subunit 3                                          | Apoptosis related                            | PQ INCREASED | 2.18 |
| 360 | ENSDARP000000094142 | ociad1           | ociad1-001           | OCIA domain containing 2                                                              | Endosome-Lysosome related                    | PQ INCREASED | 2.18 |
| 361 | ENSDARP00000119178  | ociad1           | ociad1-201           | OCIA domain containing 2                                                              | Endosome-Lysosome related                    | PQ INCREASED | 2.18 |
| 362 | ENSDARP00000112683  | ociad1           | ociad1-002           | OCIA domain containing 2                                                              | Endosome-Lysosome related                    | PQ INCREASED | 2.18 |
| 363 | ENSDARP000000039222 | gnpda2           | gnpda2-201           | Glucosamine-6-phosphate deaminase 2                                                   | Energy metabolism                            | PQ INCREASED | 2.18 |
| 364 | ENSDARP00000114418  | gnpda2           | gnpda2-001           | Glucosamine-6-phosphate deaminase 2                                                   | Energy metabolism                            | PQ INCREASED | 2.18 |
| 365 | ENSDARP00000069977  | rpl23            | rpl23-001            | Ribosomal protein L23                                                                 | Protein Synthesis                            | PQ INCREASED | 2.18 |
| 366 | ENSDARP00000109902  | zgc.162816       | zgc.162816-201       | D-serine dehydratase-like                                                             | Other                                        | PQ INCREASED | 2.18 |
| 367 | ENSDARP00000117083  | tomm70a          | tomm70a-001          | Translocase of outer mitochondrial membrane 70 homolog A (S. cerevisiae)              | Other                                        | PQ INCREASED | 2.18 |
| 368 | ENSDARP00000011426  | ambp             | ambp-001             | Arginyl aminopeptidase (aminopeptidase B)                                             | Protein degradation and synthesis inhibition | PQ INCREASED | 2.18 |
| 369 | ENSDARP00000098620  | mvda             | mvda-001             | Mevalonate (diphospho) decarboxylase a                                                | Lipid metabolism                             | PQ INCREASED | 2.18 |
| 370 | ENSDARP00000127428  | rrm2             | rrm2-004             | Ribonucleotide reductase M2 polypeptide                                               | Cell cycle, division, growth and fate        | PQ INCREASED | 2.18 |
| 371 | ENSDARP00000107514  | fkbp3            | fkbp3-202            | FK506 binding protein 3                                                               | Protein Synthesis                            | PQ INCREASED | 2.17 |
| 372 | ENSDARP00000008918  | map2k1           | map2k1-001           | Mitogen-activated protein kinase kinase 1                                             | Apoptosis related                            | PQ INCREASED | 2.17 |
| 373 | ENSDARP00000027385  | hnrmp1l          | hnrmp1l-001          | Heterogeneous nuclear ribonucleoprotein H1, like                                      | Protein Synthesis                            | PQ INCREASED | 2.17 |
| 374 | ENSDARP00000128433  | serpinb1l3       | serpinb1l3-002       | Serpin peptidase inhibitor, clade B (ovalbumin), member 1, like 3                     | Other                                        | PQ INCREASED | 2.12 |
| 375 | ENSDARP00000014914  | map2k2a          | map2k2a-001          | Mitogen-activated protein kinase kinase 2a                                            | Apoptosis related                            | PQ INCREASED | 2.12 |
| 376 | ENSDARP00000059346  | bckdha           | bckdha-001           | Branched chain keto acid dehydrogenase E1, alpha polypeptide                          | Protein degradation and synthesis inhibition | PQ INCREASED | 2.12 |
| 377 | ENSDARP00000106474  | bckdha           | bckdha-201           | Branched chain keto acid dehydrogenase E1, alpha polypeptide                          | Protein degradation and synthesis inhibition | PQ INCREASED | 2.12 |
| 378 | ENSDARP00000093670  | ndrg1a           | ndrg1a-002           | N-myc downstream regulated gene 1a                                                    | Cell cycle, division, growth and fate        | PQ INCREASED | 2.12 |
| 379 | ENSDARP00000047263  | eef1db           | eef1db-202           | Elongation factor-1, delta, b                                                         | Protein Synthesis                            | PQ INCREASED | 2.09 |
| 380 | ENSDARP00000129723  | thop1            | thop1-003            | Thimet oligopeptidase 1                                                               | Protein degradation and synthesis inhibition | PQ INCREASED | 2.09 |
| 381 | ENSDARP00000109129  | si:ch211-11k18.4 | si:ch211-11k18.4-201 | Uncharacterized protein                                                               | Other                                        | PQ INCREASED | 2.09 |
| 382 | ENSDARP00000123562  | si:ch211-11k18.4 | si:ch211-11k18.4-001 | Uncharacterized protein                                                               | Other                                        | PQ INCREASED | 2.09 |
| 383 | ENSDARP00000100592  | eef1db           | eef1db-001           | Elongation factor-1, delta, b                                                         | Protein Synthesis                            | PQ INCREASED | 2.08 |
| 384 | ENSDARP00000029821  | eef1db           | eef1db-201           | Elongation factor-1, delta, b                                                         | Protein Synthesis                            | PQ INCREASED | 2.08 |
| 385 | ENSDARP00000104512  | hsp90ab1         | hsp90ab1-201         | Heat shock protein 90kDa alpha (cytosolic), class B member 1                          | Protein Synthesis                            | PQ INCREASED | 2.08 |
| 386 | ENSDARP000000014978 | hsp90ab1         | hsp90ab1-001         | Heat shock protein 90kDa alpha (cytosolic), class B member 1                          | Protein Synthesis                            | PQ INCREASED | 2.08 |
| 387 | ENSDARP00000042703  | eef1db           | eef1db-002           | Elongation factor-1, delta, b                                                         | Protein Synthesis                            | PQ INCREASED | 2.08 |
| 388 | ENSDARP00000070780  | pca              | pca-001              | Proliferating cell nuclear antigen                                                    | Cell cycle, division, growth and fate        | PQ INCREASED | 2.07 |
| 389 | ENSDARP00000022789  | bzw1a            | bzw1a-001            | Basic leucine zipper and W2 domains 1a                                                | Cell cycle, division, growth and fate        | PQ INCREASED | 2.07 |
| 390 | ENSDARP00000038550  | mapk1            | mapk1-001            | Mitogen-activated protein kinase kinase 2a                                            | Apoptosis related                            | PQ INCREASED | 2.03 |
| 391 | ENSDARP00000123916  | mapk1            | mapk1-002            | Mitogen-activated protein kinase kinase 2a                                            | Apoptosis related                            | PQ INCREASED | 2.03 |
| 392 | ENSDARP00000076624  | rragcb           | rragcb-001           | Ras-related GTP binding Ca                                                            | Cell cycle, division, growth and fate        | PQ INCREASED | 2.03 |
| 393 | ENSDARP000000064746 | stoml2           | stoml2-201           | Stomatin (EPB72)-like 2                                                               | Other                                        | PQ INCREASED | 2.03 |
| 394 | ENSDARP00000124593  | ldh3b            | ldh3b-001            | Isocitrate dehydrogenase 3 (NAD+) beta                                                | Energy metabolism                            | PQ INCREASED | 2.03 |
| 395 | ENSDARP00000048382  | creld2           | creld2-001           | Cysteine-rich with EGF-like domains 2                                                 | Other                                        | PQ INCREASED | 2.03 |
| 396 | ENSDARP00000109480  | vtg5             | vtg5-201             | Vitellogenin 5                                                                        | Vitellogenins                                | PQ INCREASED | 2.03 |
| 397 | ENSDARP00000123659  | tpi1b            | tpi1b-002            | Triosephosphate isomerase 1b                                                          | Energy metabolism                            | PQ INCREASED | 2.00 |
| 398 | ENSDARP00000113319  | eif3ea           | eif3ea-003           | Translation initiation factor 3 subunit E                                             | Protein Synthesis                            | GQ INCREASED | 0.50 |
| 399 | ENSDARP00000037758  | cot1l            | cot1l-001            | Coactosin-like 1 (Dictyostelium)                                                      | Cell cycle, division, growth and fate        | GQ INCREASED | 0.50 |

|     |                    |                   |                       |                                                                                             |                                              |              |      |
|-----|--------------------|-------------------|-----------------------|---------------------------------------------------------------------------------------------|----------------------------------------------|--------------|------|
| 400 | ENSDARP0000022310  | adsl              | adsl-001              | Adenylosuccinate lyase                                                                      | Cell cycle, division, growth and fate        | GG INCREASED | 0.50 |
| 401 | ENSDARP0000007588  | pgd               | pgd-001               | Phosphoglucuronate hydrogenase                                                              | Energy metabolism                            | GG INCREASED | 0.50 |
| 402 | ENSDARP00000014732 | cyb5b3            | cyb5b3-001            | Cytochrome b5 reductase 3                                                                   | Energy metabolism                            | GG INCREASED | 0.50 |
| 403 | ENSDARP00000097681 | prps1a            | prps1a-002            | Phosphoribosyl pyrophosphate synthetase 1A                                                  | Protein Synthesis                            | GG INCREASED | 0.50 |
| 404 | ENSDARP0000009909  | gpia              | gpia-001              | Glucose phosphate isomerase a                                                               | Energy metabolism                            | GG INCREASED | 0.50 |
| 405 | ENSDARP00000003107 | cct7              | cct7-001              | Chaperonin containing TCP1, subunit 7                                                       | Protein Synthesis                            | GG INCREASED | 0.50 |
| 406 | ENSDARP00000123779 | fasn              | fasn-001              | Fatty acid synthase                                                                         | Lipid metabolism                             | GG INCREASED | 0.50 |
| 407 | ENSDARP00000017693 | ppp2r1b           | ppp2r1b-001           | Protein phosphatase 2                                                                       | Protein Synthesis                            | GG INCREASED | 0.50 |
| 408 | ENSDARP00000127789 | si:ch211-157j23.3 | si:ch211-157j23.3-202 | NXPE family member 3-like                                                                   | Other                                        | GG INCREASED | 0.50 |
| 409 | ENSDARP00000114435 | si:dkey-105h11.2  | si:dkey-105h11.2-001  | NXPE family member 3-like                                                                   | Other                                        | GG INCREASED | 0.50 |
| 410 | ENSDARP00000058383 | gapdhs            | gapdhs-001            | Glyceraldhyde-3-phosphate dehydrogenase, spermatogenic                                      | Energy metabolism                            | GG INCREASED | 0.50 |
| 411 | ENSDARP00000093927 | FBXO2             | FBXO2-201             | F-box protein 2                                                                             | Protein degradation and synthesis inhibition | GG INCREASED | 0.50 |
| 412 | ENSDARP00000018064 | aca2              | aca2-001              | Acetyl-CoA acetyltransferase 2                                                              | Energy metabolism                            | GG INCREASED | 0.50 |
| 413 | ENSDARP00000108188 | ssr1              | ssr1-201              | Translocon-associated protein subunit alpha                                                 | Protein Synthesis                            | GG INCREASED | 0.50 |
| 414 | ENSDARP00000012454 | phc2b             | phc2b-201             | Polyhomeotic-like protein 2-Histone H2A                                                     | Cell cycle, division, growth and fate        | GG INCREASED | 0.50 |
| 415 | ENSDARP00000029067 | rpa1              | rpa1-001              | Replication protein A1                                                                      | Cell cycle, division, growth and fate        | GG INCREASED | 0.50 |
| 416 | ENSDARP00000093898 | p4hb              | p4hb-001              | Procollagen-proline, 2-oxoglutarate 4-dioxygenase (proline 4-hydroxylase), beta polypeptide | Protein Synthesis                            | GG INCREASED | 0.50 |
| 417 | ENSDARP00000104575 | tcp1              | tcp1-201              | T-complex polypeptide 1                                                                     | Protein Synthesis                            | GG INCREASED | 0.50 |
| 418 | ENSDARP00000034904 | psmc4             | psmc4-001             | Proteasome (prosome, macropain) 26S subunit, ATPase, 4                                      | Protein Synthesis                            | GG INCREASED | 0.50 |
| 419 | ENSDARP00000113985 | si:ch211-251f6.7  | si:ch211-251f6.7-001  | Fish egg lectin like                                                                        | Lectins                                      | GG INCREASED | 0.50 |
| 420 | ENSDARP0000009285  | napa              | napa-001              | N-ethylmaleimide-sensitive factor attachment protein, alpha                                 | Other                                        | GG INCREASED | 0.50 |
| 421 | ENSDARP00000048990 | si:ch211-157j23.2 | si:ch211-157j23.2-001 | NXPE family member 3-like                                                                   | Other                                        | GG INCREASED | 0.50 |
| 422 | ENSDARP00000129506 | eprs              | eprs-001              | Glutamyl-prolyl-tRNA synthetase                                                             | Protein Synthesis                            | GG INCREASED | 0.49 |
| 423 | ENSDARP00000125075 | sept7b            | Novel                 | Cytoskeleton proteins                                                                       | Cell cycle, division, growth and fate        | GG INCREASED | 0.49 |
| 424 | ENSDARP00000112912 | impa1             | impa1-002             | Inositol(myo)-1(or 4)-monophosphatase 1                                                     | Cell cycle, division, growth and fate        | GG INCREASED | 0.49 |
| 425 | ENSDARP00000076390 | rtn4a             | rtn4a-003             | Reticulon 4a                                                                                | Protein Synthesis                            | GG INCREASED | 0.49 |
| 426 | ENSDARP00000079227 | prosc             | prosc-201             | Proline synthetase co-transcribed homolog (bacterial)                                       | Protein Synthesis                            | GG INCREASED | 0.49 |
| 427 | ENSDARP00000116169 | prosc             | prosc-001             | Proline synthetase co-transcribed homolog (bacterial)                                       | Protein Synthesis                            | GG INCREASED | 0.49 |
| 428 | ENSDARP00000018737 | rpl27             | rpl27-001             | Arge subunit ribosomal protein L27e                                                         | Protein Synthesis                            | GG INCREASED | 0.49 |
| 429 | ENSDARP00000117864 | rpl27             | rpl27-002             | Arge subunit ribosomal protein L27e                                                         | Protein Synthesis                            | GG INCREASED | 0.49 |
| 430 | ENSDARP00000072525 | C20H6orf211       | C20H6orf211-001       | Protein-glutamate O-methyltransferase                                                       | Cell cycle, division, growth and fate        | GG INCREASED | 0.49 |
| 431 | ENSDARP00000066897 | rps16             | rps16-001             | Ribosomal protein S16                                                                       | Protein Synthesis                            | GG INCREASED | 0.49 |
| 432 | ENSDARP00000089806 | si:ch211-251f6.7  | si:ch211-251f6.7-201  | Fish egg lectin like                                                                        | Lectins                                      | GG INCREASED | 0.49 |
| 433 | ENSDARP00000075671 | abhd14a           | abhd14a-001           | Abhydrolase domain containing 14A                                                           | Protein degradation and synthesis inhibition | GG INCREASED | 0.49 |
| 434 | ENSDARP00000109466 | abhd14a           | abhd14a-201           | Abhydrolase domain containing 14A                                                           | Protein degradation and synthesis inhibition | GG INCREASED | 0.49 |
| 435 | ENSDARP00000028641 | dnaj2a            | dnaj2a-201            | DnaJ homolog subfamily A member 2                                                           | Protein Synthesis                            | GG INCREASED | 0.49 |
| 436 | ENSDARP00000045893 | rnaseh2a          | rnaseh2a-001          | Ribonuclease H2 subunit A                                                                   | Cell cycle, division, growth and fate        | GG INCREASED | 0.49 |
| 437 | ENSDARP00000108257 | sept2             | sept2-001             | Septin 2                                                                                    | Cell cycle, division, growth and fate        | GG INCREASED | 0.49 |
| 438 | ENSDARP00000105058 | sept2             | sept2-203             | Septin 2                                                                                    | Cell cycle, division, growth and fate        | GG INCREASED | 0.49 |
| 439 | ENSDARP00000056965 | sept2             | sept2-201             | Septin 2                                                                                    | Cell cycle, division, growth and fate        | GG INCREASED | 0.49 |
| 440 | ENSDARP00000105338 | sept2             | sept2-202             | Septin 2                                                                                    | Cell cycle, division, growth and fate        | GG INCREASED | 0.49 |
| 441 | ENSDARP00000046972 | capza1a           | capza1a-201           | Capping protein (actin filament) muscle Z-line, alpha 1a                                    | Cell cycle, division, growth and fate        | GG INCREASED | 0.49 |
| 442 | ENSDARP00000062644 | scarb1            | scarb1-201            | Scavenger receptor class B, member 1                                                        | Endosome-Lysosome related                    | GG INCREASED | 0.49 |
| 443 | ENSDARP00000104653 | eif4a2            | eif4a2-001            | Eukaryotic translation initiation factor 4A, isoform 1B                                     | Protein Synthesis                            | GG INCREASED | 0.49 |
| 444 | ENSDARP00000070224 | eprs              | eprs-201              | Glutamyl-prolyl-tRNA synthetase                                                             | Protein Synthesis                            | GG INCREASED | 0.49 |
| 445 | ENSDARP00000121669 | dctn2             | dctn2-001             | Dynactin 2                                                                                  | Cell cycle, division, growth and fate        | GG INCREASED | 0.49 |
| 446 | ENSDARP00000093918 | dctn2             | dctn2-202             | Dynactin 2                                                                                  | Cell cycle, division, growth and fate        | GG INCREASED | 0.49 |
| 447 | ENSDARP00000127771 | zgc:152830        | zgc:152830-001        | Peplidase M17 superfamily-                                                                  | Protein degradation and synthesis inhibition | GG INCREASED | 0.49 |
| 448 | ENSDARP00000097937 | zgc:152830        | zgc:152830-001        | Cytosol aminopeptidase family                                                               | Protein degradation and synthesis inhibition | GG INCREASED | 0.49 |
| 449 | ENSDARP00000119229 | si:ch211-157j23.5 | si:ch211-157j23.5-201 | NXPE family member 3-like                                                                   | Other                                        | GG INCREASED | 0.49 |
| 450 | ENSDARP00000129574 | si:ch211-157j23.5 | si:ch211-157j23.5-001 | NXPE family member 3-like                                                                   | Other                                        | GG INCREASED | 0.49 |
| 451 | ENSDARP00000057943 | rpl26             | rpl26-001             | Ribosomal protein L26                                                                       | Protein Synthesis                            | GG INCREASED | 0.49 |
| 452 | ENSDARP00000126732 | rpl24             | rpl24-001             | Ribosomal protein L24                                                                       | Protein Synthesis                            | GG INCREASED | 0.49 |
| 453 | ENSDARP00000105266 | zgc:152830        | zgc:152830-201        | Peplidase M17 superfamily-                                                                  | Protein degradation and synthesis inhibition | GG INCREASED | 0.48 |
| 454 | ENSDARP00000103413 | vars              | vars-202              | Valyl-tRNA synthetase                                                                       | Protein Synthesis                            | GG INCREASED | 0.48 |
| 455 | ENSDARP00000094372 | npc1              | npc1-001              | Niemann-Pick disease, type C1                                                               | Endosome-Lysosome related                    | GG INCREASED | 0.48 |
| 456 | ENSDARP00000059310 | siae              | siae-001              | Sialic acid acetyltransferase                                                               | Immune system related                        | GG INCREASED | 0.48 |
| 457 | ENSDARP00000042594 | dctn2             | dctn2-201             | Dynactin 2                                                                                  | Cell cycle, division, growth and fate        | GG INCREASED | 0.48 |
| 458 | ENSDARP00000124582 | cnp               | cnp-001               | 2',3'-cyclic nucleotide 3' phosphodiesterase                                                | Cell cycle, division, growth and fate        | GG INCREASED | 0.48 |
| 459 | ENSDARP00000061100 | igt2r             | igt2r-001             | Insulin-like growth factor 2 receptor                                                       | Endosome-Lysosome related                    | GG INCREASED | 0.48 |
| 460 | ENSDARP00000129036 | si:dkey-2417.6    | si:dkey-2417.6-201    | C-type lectin                                                                               | Lectins                                      | GG INCREASED | 0.48 |
| 461 | ENSDARP00000060465 | si:dkey-2417.6    | si:dkey-2417.6-001    | C-type lectin                                                                               | Lectins                                      | GG INCREASED | 0.48 |
| 462 | ENSDARP00000127254 | si:dkey-2417.6    | si:dkey-2417.6-003    | C-type lectin                                                                               | Lectins                                      | GG INCREASED | 0.48 |
| 463 | ENSDARP00000066510 | pgm1              | pgm1-001              | Phosphoglucutase 1                                                                          | Energy metabolism                            | GG INCREASED | 0.48 |
| 464 | ENSDARP00000092429 | calr2             | calr2-001             | Calreticulin, like 2                                                                        | Protein Synthesis                            | GG INCREASED | 0.48 |
| 465 | ENSDARP00000096883 | ids               | ids-001               | Iduronate 2-sulfatase                                                                       | Endosome-Lysosome related                    | GG INCREASED | 0.48 |
| 466 | ENSDARP00000090432 | zgc:55413         | zgc:55413-202         | Palmitoyl-(prolein) hydrolase activity                                                      | Other                                        | GG INCREASED | 0.48 |
| 467 | ENSDARP00000125995 | pkma              | pkma-002              | Pyruvate kinase, muscle, a                                                                  |                                              | GG INCREASED | 0.48 |

|     |                     |                   |                       |                                                             |                                              |              |      |
|-----|---------------------|-------------------|-----------------------|-------------------------------------------------------------|----------------------------------------------|--------------|------|
| 468 | ENSDARP00000125765  | pkma              | pkma-001              | Pyruvate kinase, muscle, a                                  | Energy metabolism                            | GQ INCREASED | 0.48 |
| 469 | ENSDARP00000099755  | psmb5             | psmb5-001             | Proteasome (prosome, macropain) subunit, beta type, 5       | Protein degradation and synthesis inhibition | GQ INCREASED | 0.48 |
| 470 | ENSDARP00000020154  | ehd3              | ehd3-001              | EH-domain containing 3                                      | Protein degradation and synthesis inhibition | GQ INCREASED | 0.48 |
| 471 | ENSDARP00000074719  | pgam2             | pgam2-001             | Phosphoglycerate mutase 2 (muscle)                          | Energy metabolism                            | GQ INCREASED | 0.48 |
| 472 | ENSDARP0000004738   | cct3              | cct3-001              | Chaperonin containing Top1, subunit 3                       | Protein Synthesis                            | GQ INCREASED | 0.48 |
| 473 | ENSDARP00000052929  | ndufv1            | ndufv1-001            | NADH dehydrogenase (ubiquinone) flavoprotein 1              | Energy metabolism                            | GQ INCREASED | 0.47 |
| 474 | ENSDARP00000087338  | ppp1cab           | ppp1cab-001           | Protein phosphatase 1, catalytic subunit, alpha isoform b   | Cell cycle, division, growth and fate        | GQ INCREASED | 0.47 |
| 475 | ENSDARP00000019120  | anxa11b           | anxa11b-201           | Annexin A11b                                                | Immune system related                        | GQ INCREASED | 0.47 |
| 476 | ENSDARP000000124670 | anxa11b           | anxa11b-001           | Annexin A11b                                                | Immune system related                        | GQ INCREASED | 0.47 |
| 477 | ENSDARP00000112654  | eif5a             | eif5a-003             | Eukaryotic translation initiation factor 5A                 | Protein Synthesis                            | GQ INCREASED | 0.47 |
| 478 | ENSDARP00000124216  | cnp               | cnp-007               | 2',3'-cyclic nucleotide 3' phosphodiesterase                | Cell cycle, division, growth and fate        | GQ INCREASED | 0.47 |
| 479 | ENSDARP00000112576  | zgc:66313         | zgc:66313-001         | Alpha-amylase                                               | Energy metabolism                            | GQ INCREASED | 0.47 |
| 480 | ENSDARP00000119679  | cnp               | cnp-010               | 2',3'-cyclic nucleotide 3' phosphodiesterase                | Cell cycle, division, growth and fate        | GQ INCREASED | 0.47 |
| 481 | ENSDARP00000127543  | si:ch211-157 23.2 | si:ch211-157 23.2-201 | NXPE family member 3-like                                   | Other                                        | GQ INCREASED | 0.47 |
| 482 | ENSDARP00000062650  | pkma              | pkma-201              | Pyruvate kinase, muscle, a                                  | Energy metabolism                            | GQ INCREASED | 0.47 |
| 483 | ENSDARP00000069223  | shmt1             | shmt1-001             | Serine hydroxymethyltransferase 1 (soluble)                 | Protein Synthesis                            | GQ INCREASED | 0.46 |
| 484 | ENSDARP00000120541  | cnp               | cnp-003               | 2',3'-cyclic nucleotide 3' phosphodiesterase                | Cell cycle, division, growth and fate        | GQ INCREASED | 0.46 |
| 485 | ENSDARP00000110339  | pkma              | pkma-203              | Pyruvate kinase, muscle, a                                  | Energy metabolism                            | GQ INCREASED | 0.46 |
| 486 | ENSDARP00000091365  | pdia5             | pdia5-001             | Protein disulfide isomerase family A, member 5              | Protein Synthesis                            | GQ INCREASED | 0.46 |
| 487 | ENSDARP00000108306  | cdc42             | cdc42-202             | Cell division cycle 42                                      | Cell cycle, division, growth and fate        | GQ INCREASED | 0.46 |
| 488 | ENSDARP00000116065  | zgc:66313         | zgc:66313-007         | Alpha-amylase                                               | Energy metabolism                            | GQ INCREASED | 0.46 |
| 489 | ENSDARP00000015775  | sars              | sars-001              | Seryl- aminoacyl-tRNA synthetase                            | Protein Synthesis                            | GQ INCREASED | 0.46 |
| 490 | ENSDARP00000114417  | cnp               | cnp-004               | 2',3'-cyclic nucleotide 3' phosphodiesterase                | Cell cycle, division, growth and fate        | GQ INCREASED | 0.46 |
| 491 | ENSDARP00000117465  | cnp               | cnp-009               | 2',3'-cyclic nucleotide 3' phosphodiesterase                | Cell cycle, division, growth and fate        | GQ INCREASED | 0.46 |
| 492 | ENSDARP00000118406  | cnp               | cnp-005               | 2',3'-cyclic nucleotide 3' phosphodiesterase                | Cell cycle, division, growth and fate        | GQ INCREASED | 0.46 |
| 493 | ENSDARP00000118615  | zgc:66313         | zgc:66313-003         | Alpha-amylase                                               | Energy metabolism                            | GQ INCREASED | 0.45 |
| 494 | ENSDARP00000112608  | cct6a             | cct6a-002             | Chaperonin containing TCP1, subunit 6A                      | Protein Synthesis                            | GQ INCREASED | 0.45 |
| 495 | ENSDARP00000027102  | nap111            | nap111-201            | Nucleosome assembly protein 1-like 1                        | Cell cycle, division, growth and fate        | GQ INCREASED | 0.45 |
| 496 | ENSDARP0000003468   | cct8              | cct8-001              | T-complex protein 1 subunit theta                           | Protein Synthesis                            | GQ INCREASED | 0.45 |
| 497 | ENSDARP00000107134  | ktn1              | ktn1-001              | Kinectin 1                                                  | Other                                        | GQ INCREASED | 0.44 |
| 498 | ENSDARP00000120480  | zgc:66313         | zgc:66313-002         | Alpha-amylase                                               | Energy metabolism                            | GQ INCREASED | 0.44 |
| 499 | ENSDARP00000122652  | zgc:66313         | zgc:66313-005         | Alpha-amylase                                               | Energy metabolism                            | GQ INCREASED | 0.44 |
| 500 | ENSDARP00000082159  | igl2bp1           | igl2bp1-001           | Insulin-like growth factor 2 mRNA binding protein 1         | Protein Synthesis                            | GQ INCREASED | 0.44 |
| 501 | ENSDARP00000005691  | ktn1              | ktn1-201              | Kinectin 1                                                  | Other                                        | GQ INCREASED | 0.44 |
| 502 | ENSDARP00000020770  | mithfd1b          | mithfd1b-001          | Methylenetetrahydrofolate dehydrogenase (NADP+ dependent) 1 | Cell cycle, division, growth and fate        | GQ INCREASED | 0.44 |
| 503 | ENSDARP00000102463  | sept8a            | sept8a-001            | Septin 8a                                                   | Cell cycle, division, growth and fate        | GQ INCREASED | 0.44 |
| 504 | ENSDARP00000056720  | ldhd              | ldhd-001              | D-lactate dehydrogenase (cytochrome)                        | Energy metabolism                            | GQ INCREASED | 0.44 |
| 505 | ENSDARP00000125746  | neu3.4            | neu3.4-001            | Sialidase 3, tandem duplicate 4                             | Lipid metabolism                             | GQ INCREASED | 0.44 |
| 506 | ENSDARP00000037906  | usp14             | usp14-201             | Ubiquitin specific peptidase 14                             | Protein degradation and synthesis inhibition | GQ INCREASED | 0.44 |
| 507 | ENSDARP00000127023  | si:ch1073-13h15.3 | si:ch1073-13h15.3-001 | Putative all-trans-retinol 13,14-reductase                  | REDOX/DeTox related                          | GQ INCREASED | 0.44 |
| 508 | ENSDARP00000011673  | ddi2              | ddi2-001              | DNA-damage inducible protein 2                              | Protein degradation and synthesis inhibition | GQ INCREASED | 0.44 |
| 509 | ENSDARP00000013512  | zgc:112334        | zgc:112334-201        | Rab GDP dissociation inhibitor alpha                        | Other                                        | GQ INCREASED | 0.44 |
| 510 | ENSDARP00000049225  | acox1             | acox1-001             | Acyl-CoA oxidase 1, palmitoyl                               | Lipid metabolism                             | GQ INCREASED | 0.44 |
| 511 | ENSDARP00000067559  | acox1             | acox1-002             | Acyl-CoA oxidase 1, palmitoyl                               | Lipid metabolism                             | GQ INCREASED | 0.44 |
| 512 | ENSDARP00000017123  | glud1b            | glud1b-201            | Glutamate dehydrogenase 1b                                  | Energy metabolism                            | GQ INCREASED | 0.44 |
| 513 | ENSDARP00000091816  | glud1b            | glud1b-001            | Glutamate dehydrogenase 1b                                  | Energy metabolism                            | GQ INCREASED | 0.44 |
| 514 | ENSDARP00000024643  | adh8a             | adh8a-001             | Alcohol dehydrogenase 8a                                    | REDOX/DeTox related                          | GQ INCREASED | 0.44 |
| 515 | ENSDARP00000090576  | arpc2             | arpc2-001             | Actin related protein 2/3 complex, subunit 2                | Apoptosis related                            | GQ INCREASED | 0.44 |
| 516 | ENSDARP00000111384  | zgc:112334        | zgc:112334-202        | Rab GDP dissociation inhibitor alpha                        | Other                                        | GQ INCREASED | 0.44 |
| 517 | ENSDARP00000069585  | carhsp1           | carhsp1-201           | Calcium regulated heat stable protein 1                     | Protein Synthesis                            | GQ INCREASED | 0.44 |
| 518 | ENSDARP00000125927  | carhsp1           | carhsp1-001           | Calcium regulated heat stable protein 1                     | Protein Synthesis                            | GQ INCREASED | 0.44 |
| 519 | ENSDARP00000064111  | glrx5             | glrx5-001             | Monothiol glutaredoxin                                      | Protein Synthesis                            | GQ INCREASED | 0.44 |
| 520 | ENSDARP00000041446  | ktn1              | ktn1-002              | Kinectin 1                                                  | Other                                        | GQ INCREASED | 0.44 |
| 521 | ENSDARP00000080584  | ktn1              | ktn1-202              | Kinectin 1                                                  | Other                                        | GQ INCREASED | 0.44 |
| 522 | ENSDARP00000005670  | rap1aa            | rap1aa-002            | Rap-1A member of RAS oncogene family a                      | Oncogenes related                            | GQ INCREASED | 0.44 |
| 523 | ENSDARP00000116523  | rap1aa            | rap1aa-001            | Rap-1A member of RAS oncogene family a                      | Oncogenes related                            | GQ INCREASED | 0.44 |
| 524 | ENSDARP00000112718  | crz               | crz-002               | Crystallin, zeta (quinone reductase)                        | Energy metabolism                            | GQ INCREASED | 0.44 |
| 525 | ENSDARP00000008973  | dlst              | dlst-001              | Dihydropyrimidine S-succinyltransferase                     | Energy metabolism                            | GQ INCREASED | 0.44 |
| 526 | ENSDARP00000067865  | RPS17             | RPS17-201             | Ribosomal protein S17                                       | Protein Synthesis                            | GQ INCREASED | 0.44 |
| 527 | ENSDARP00000129150  | RPS17             | RPS17-001             | Ribosomal protein S17                                       | Protein Synthesis                            | GQ INCREASED | 0.44 |
| 528 | ENSDARP00000095998  | CABZ01034848.1    | CABZ01034848.1-201    | Myosin 9-like                                               | Energy metabolism                            | GQ INCREASED | 0.44 |
| 529 | ENSDARP00000003030  | hibadhb           | hibadhb-001           | 3-hydroxyisobutyrate dehydrogenase b                        | Protein degradation and synthesis inhibition | GQ INCREASED | 0.44 |
| 530 | ENSDARP00000011148  | rps6              | rps6-201              | Small subunit ribosomal protein S6e                         | Protein Synthesis                            | GQ INCREASED | 0.44 |
| 531 | ENSDARP00000093469  | ppp2r5d           | ppp2r5d-201           | Protein phosphatase 2, regulatory subunit B', delta         | Protein Synthesis                            | GQ INCREASED | 0.44 |
| 532 | ENSDARP00000024354  | impdh2            | impdh2-001            | Inosine 5'-monophosphate dehydrogenase 2                    | Cell cycle, division, growth and fate        | GQ INCREASED | 0.44 |
| 533 | ENSDARP00000125879  | neu3.5            | neu3.5-001            | Sialidase 3, tandem duplicate 4                             | Lipid metabolism                             | GQ INCREASED | 0.44 |
| 534 | ENSDARP00000126188  | rps18             | rps18-006             | Small subunit ribosomal protein S18e                        | Protein Synthesis                            | GQ INCREASED | 0.44 |
| 535 | ENSDARP00000095645  | trap1             | trap1-201             | TNF receptor-associated protein 1                           | Protein Synthesis                            | GQ INCREASED | 0.44 |



|     |                    |                   |                       |                                                                           |                                              |              |      |
|-----|--------------------|-------------------|-----------------------|---------------------------------------------------------------------------|----------------------------------------------|--------------|------|
| 536 | ENSDARP00000095167 | smx5              | smx5-201              | U6 snRNA-associated Sm-like protein LSM2                                  | Protein Synthesis                            | GQ INCREASED | 0.44 |
| 537 | ENSDARP00000127825 | rps28             | rps28-004             | Small subunit ribosomal protein S28e                                      | Protein Synthesis                            | GQ INCREASED | 0.44 |
| 538 | ENSDARP0000001585  | echs1             | echs1-001             | Noyl CoA hydratase, short chain, 1, mitochondrial                         | Lipid metabolism                             | GQ INCREASED | 0.44 |
| 539 | ENSDARP00000121906 | pcca              | pcca-002              | Propionyl CoA carboxylase, alpha polypeptide                              | Energy metabolism                            | GQ INCREASED | 0.44 |
| 540 | ENSDARP00000107200 | sl:dkey-179j5.5   | sl:dkey-179j5.5-202   | Gal lectin superfamily                                                    | Lectins                                      | GQ INCREASED | 0.44 |
| 541 | ENSDARP00000107323 | trap1             | trap1-202             | TNF receptor-associated protein 1                                         | Protein Synthesis                            | GQ INCREASED | 0.44 |
| 542 | ENSDARP00000052062 | rps28             | rps28-003             | Small subunit ribosomal protein S28e                                      | Protein Synthesis                            | GQ INCREASED | 0.44 |
| 543 | ENSDARP00000115796 | rps28             | rps28-001             | Small subunit ribosomal protein S28e                                      | Protein Synthesis                            | GQ INCREASED | 0.44 |
| 544 | ENSDARP00000072253 | serpinb12         | serpinb12-001         | Serpin peptidase inhibitor, clade B (ovalbumin), member 1, like 2         | Other                                        | GQ INCREASED | 0.44 |
| 545 | ENSDARP00000093527 | sl:dkey-179j5.5   | sl:dkey-179j5.5-201   | Gal lectin superfamily                                                    | Lectins                                      | GQ INCREASED | 0.44 |
| 546 | ENSDARP00000114428 | cpt2              | cpt2-002              | Camitine palmitoyltransferase II                                          | Lipid metabolism                             | GQ INCREASED | 0.44 |
| 547 | ENSDARP00000121781 | myh11a            | myh11a-002            | Myosin, heavy chain 11a, smooth muscle                                    | Cell cycle, division, growth and fate        | GQ INCREASED | 0.44 |
| 548 | ENSDARP00000047012 | srprb             | srprb-001             | Signal recognition particle receptor, B subunit                           | Protein Synthesis                            | GQ INCREASED | 0.44 |
| 549 | ENSDARP00000112598 | si:ch211-157 23.3 | si:ch211-157 23.3-001 | NXPE family member 3-like                                                 | Other                                        | GQ INCREASED | 0.44 |
| 550 | ENSDARP00000103437 | cpdb              | cpdb-201              | Carboxypeptidase D, b                                                     | Protein degradation and synthesis inhibition | GQ INCREASED | 0.44 |
| 551 | ENSDARP00000107538 | CABZ01073085.1    | CABZ01073085.1-201    | Chaperonin containing TCP1, subunit 2 (beta)                              | Protein Synthesis                            | GQ INCREASED | 0.44 |
| 552 | ENSDARP00000115288 | ufd1l             | ufd1l-004             | Ubiquitin fusion degradation 1-like                                       | Protein degradation and synthesis inhibition | GQ INCREASED | 0.44 |
| 553 | ENSDARP00000007716 | atp5f1            | atp5f1-001            | ATP synthase, H+ transporting, mitochondrial F0 complex, subunit g        | Energy metabolism                            | GQ INCREASED | 0.44 |
| 554 | ENSDARP00000126736 | ca15b             | ca15b-005             | Carbonic anhydrase XV b                                                   | Energy metabolism                            | GQ INCREASED | 0.44 |
| 555 | ENSDARP00000025042 | sub1b             | sub1b-001             | UB1 homolog b (S. cerevisiae)                                             | Protein Synthesis                            | GQ INCREASED | 0.44 |
| 556 | ENSDARP00000117668 | man2b1            | man2b1-002            | Mannosidase, alpha, class 2B, member 1                                    | Energy metabolism                            | GQ INCREASED | 0.44 |
| 557 | ENSDARP00000118860 | si:ch1073-75o15.4 | si:ch1073-75o15.4-001 | SUEL type lectin                                                          | Lectins                                      | GQ INCREASED | 0.44 |
| 558 | ENSDARP00000113030 | trap1             | trap1-001             | TNF receptor-associated protein 1                                         | Protein Synthesis                            | GQ INCREASED | 0.44 |
| 559 | ENSDARP00000121416 | si:ch1073-75o15.4 | si:ch1073-75o15.4-002 | SUEL type lectin                                                          | Lectins                                      | GQ INCREASED | 0.44 |
| 560 | ENSDARP00000075627 | neu3.3            | neu3.3-001            | Sialidase 3, tandem duplicate 4                                           | Lipid metabolism                             | GQ INCREASED | 0.44 |
| 561 | ENSDARP00000079035 | neu3.3            | neu3.3-201            | Sialidase 3, tandem duplicate 4                                           | Lipid metabolism                             | GQ INCREASED | 0.44 |
| 562 | ENSDARP00000032037 | pdcd5             | pdcd5-001             | Programmed cell death 5                                                   | Apoptosis related                            | GQ INCREASED | 0.44 |
| 563 | ENSDARP00000116530 | snx3              | snx3-003              | Sorting nexin-3/12                                                        | Protein degradation and synthesis inhibition | GQ INCREASED | 0.44 |
| 564 | ENSDARP00000075204 | SEPT7-            | SEPT7-201             | Cytoskeleton proteins                                                     | Cell cycle, division, growth and fate        | GQ INCREASED | 0.44 |
| 565 | ENSDARP00000069063 | hm:zeh0351        | hm:zeh0351            | Cytoskeleton proteins                                                     | Cell cycle, division, growth and fate        | GQ INCREASED | 0.44 |
| 566 | ENSDARP00000117207 | CU469531.2        | CU469531.2-201        | Ras-related protein Rab-11B                                               | Other                                        | GQ INCREASED | 0.44 |
| 567 | ENSDARP00000124654 | glyck1            | glyck1-001            | Glycerate kinase                                                          | Energy metabolism                            | GQ INCREASED | 0.43 |
| 568 | ENSDARP00000113159 | ppp2r5d           | ppp2r5d-001           | Protein phosphatase 2, regulatory subunit B', delta                       | Protein Synthesis                            | GQ INCREASED | 0.43 |
| 569 | ENSDARP0000012850  | asns              | asns-201              | Asparagine synthetase (glutamine-hydrolyzing)                             | Protein Synthesis                            | GQ INCREASED | 0.43 |
| 570 | ENSDARP00000107713 | asns              | asns-001              | Asparagine synthetase (glutamine-hydrolyzing)                             | Protein Synthesis                            | GQ INCREASED | 0.43 |
| 571 | ENSDARP00000110193 | asns              | asns-202              | Asparagine synthetase (glutamine-hydrolyzing)                             | Protein Synthesis                            | GQ INCREASED | 0.43 |
| 572 | ENSDARP00000042511 | pltlnbl           | pltlnbl-201           | Phosphatidylinositol transfer protein, beta, like                         | Lipid metabolism                             | GQ INCREASED | 0.43 |
| 573 | ENSDARP00000095113 | pltlnbl           | pltlnbl-202           | Phosphatidylinositol transfer protein, beta, like                         | Lipid metabolism                             | GQ INCREASED | 0.43 |
| 574 | ENSDARP00000113091 | adsl              | adsl-002              | Adenylosuccinate lyase                                                    | Cell cycle, division, growth and fate        | GQ INCREASED | 0.43 |
| 575 | ENSDARP00000074214 | ndufs2            | ndufs2-201            | NADH dehydrogenase (ubiquinone) Fe-S protein 2                            | Energy metabolism                            | GQ INCREASED | 0.43 |
| 576 | ENSDARP00000028858 | sept8b            | sept8b-001            | Septin 8a                                                                 | Cell cycle, division, growth and fate        | GQ INCREASED | 0.43 |
| 577 | ENSDARP00000012094 | snx3              | snx3-001              | Sorting nexin-3/12                                                        | Protein Synthesis                            | GQ INCREASED | 0.43 |
| 578 | ENSDARP00000124720 | eil3eb            | eil3eb-003            | Eukaryotic translation initiation factor                                  | Protein Synthesis                            | GQ INCREASED | 0.43 |
| 579 | ENSDARP00000114890 | acat2             | acat2-002             | Acetyl-CoA acetyltransferase 2                                            | Energy metabolism                            | GQ INCREASED | 0.43 |
| 580 | ENSDARP00000121223 | sept8a            | sept8a-002            | Septin 8a                                                                 | Cell cycle, division, growth and fate        | GQ INCREASED | 0.43 |
| 581 | ENSDARP00000058796 | hebp2             | hebp2-201             | Heme binding protein 2                                                    | Other                                        | GQ INCREASED | 0.43 |
| 582 | ENSDARP00000062535 | hebp2             | hebp2-001             | Heme binding protein 2                                                    | Other                                        | GQ INCREASED | 0.43 |
| 583 | ENSDARP00000114030 | scarb1            | scarb1-002            | Scavenger receptor class B, member 1                                      | Endosome-Lysosome related                    | GQ INCREASED | 0.43 |
| 584 | ENSDARP00000123981 | mcm7              | mcm7-001              | Inchrosome maintenance complex component 7                                | Cell cycle, division, growth and fate        | GQ INCREASED | 0.43 |
| 585 | ENSDARP00000122752 | pcca              | pcca-003              | Propionyl CoA carboxylase, alpha polypeptide                              | Energy metabolism                            | GQ INCREASED | 0.43 |
| 586 | ENSDARP00000070414 | vtnb              | vtnb-001              | Vitronectin b                                                             | Immune system related                        | GQ INCREASED | 0.43 |
| 587 | ENSDARP00000106695 | NHLRC3            | NHLRC3-201            | NHL repeat containing 3                                                   | Other                                        | GQ INCREASED | 0.43 |
| 588 | ENSDARP00000042249 | rap1b             | rap1b-201             | RAP1B, member of RAS oncogene family                                      | Oncogenes related                            | GQ INCREASED | 0.43 |
| 589 | ENSDARP00000114387 | rap1b             | rap1b-001             | RAP1B, member of RAS oncogene family                                      | Oncogenes related                            | GQ INCREASED | 0.43 |
| 590 | ENSDARP00000035945 | sccpdhb           | sccpdhb-001           | Saccharopine dehydrogenase b                                              | Other                                        | GQ INCREASED | 0.43 |
| 591 | ENSDARP00000052702 | nucb2b            | nucb2b-001            | Nucleobindin 2                                                            | Other                                        | GQ INCREASED | 0.43 |
| 592 | ENSDARP00000129420 | ddi2              | ddi2-002              | DNA-damage inducible protein 2                                            | Other                                        | GQ INCREASED | 0.43 |
| 593 | ENSDARP00000068144 | pcxb              | pcxb-201              | Pyruvate carboxylase b                                                    | Energy metabolism                            | GQ INCREASED | 0.43 |
| 594 | ENSDARP0000017335  | gorasp2           | gorasp2-001           | Golgi reassembly stacking protein 2, 55kDa                                | Protein Synthesis                            | GQ INCREASED | 0.43 |
| 595 | ENSDARP00000069178 | si:ch1073-13h15.3 | si:ch1073-13h15.3-201 | Putative all-trans-retinol 13, 14-reductase                               | REDOX/Detox related                          | GQ INCREASED | 0.43 |
| 596 | ENSDARP00000123687 | shmt1             | shmt1-003             | Serine hydroxymethyltransferase 1 (soluble)                               | Protein Synthesis                            | GQ INCREASED | 0.42 |
| 597 | ENSDARP00000121832 | shmt1             | shmt1-002             | Serine hydroxymethyltransferase 1 (soluble)                               | Protein Synthesis                            | GQ INCREASED | 0.42 |
| 598 | ENSDARP00000025374 | uap1f1            | uap1f1-001            | UDP-N-acteylglucosamine pyrophosphorylase 1, like 1                       | Cell cycle, division, growth and fate        | GQ INCREASED | 0.42 |
| 599 | ENSDARP00000054618 | prps1b            | prps1b-001            | Phosphoribosyl pyrophosphate synthetase 1A                                | Protein Synthesis                            | GQ INCREASED | 0.41 |
| 600 | ENSDARP00000090402 | eil3s6ip          | eil3s6ip-201          | Eukaryotic translation initiation factor 3, subunit 6 interacting protein | Protein Synthesis                            | GQ INCREASED | 0.40 |
| 601 | ENSDARP00000112498 | eil3s6ip          | eil3s6ip-202          | Eukaryotic translation initiation factor 3, subunit 6 interacting protein | Protein Synthesis                            | GQ INCREASED | 0.40 |
| 602 | ENSDARP00000096295 | ACTR3 (1 of 2)    | ACTR3 (1 of 2)-201    | ARP3 actin-related protein 3 homolog (yeast)                              | Cell cycle, division, growth and fate        | GQ INCREASED | 0.40 |
| 603 | ENSDARP00000124779 | cat               | cat-001               | Catalase                                                                  | REDOX/Detox related                          | GQ INCREASED | 0.40 |

|     |                     |               |                   |                                                                         |                                              |              |      |
|-----|---------------------|---------------|-------------------|-------------------------------------------------------------------------|----------------------------------------------|--------------|------|
| 604 | ENSDARP0000026554   | psmc3         | psmc3-201         | Proteasome (prosome, macropain) 26S subunit, ATPase, 3                  | Protein degradation and synthesis inhibition | GQ INCREASED | 0.40 |
| 605 | ENSDARP00000081816  | ddx6          | ddx6-201          | DEAD (Asp-Glu-Ala-Asp) box helicase 6                                   | Cell cycle, division, growth and fate        | GQ INCREASED | 0.40 |
| 606 | ENSDARP00000120609  | rps18         | rps18-005         | Small subunit ribosomal protein S18e                                    | Protein Synthesis                            | GQ INCREASED | 0.39 |
| 607 | ENSDARP00000016831  | cct6a         | cct6a-201         | Chaperonin containing TCP1, subunit 6A                                  | Protein Synthesis                            | GQ INCREASED | 0.39 |
| 608 | ENSDARP00000118006  | cct6a         | cct6a-001         | Chaperonin containing TCP1, subunit 6A                                  | Protein Synthesis                            | GQ INCREASED | 0.39 |
| 609 | ENSDARP00000063876  | prdx6         | prdx6-001         | Peroxioredoxin 6                                                        | REDOX/Detox related                          | GQ INCREASED | 0.39 |
| 610 | ENSDARP00000013402  | cat           | cat-201           | Catalase                                                                | REDOX/Detox related                          | GQ INCREASED | 0.38 |
| 611 | ENSDARP00000107673  | cat           | cat-202           | Catalase                                                                | REDOX/Detox related                          | GQ INCREASED | 0.38 |
| 612 | ENSDARP00000098561  | cnp           | cnp-202           | 2',3'-cyclic nucleotide 3' phosphodiesterase                            | Cell cycle, division, growth and fate        | GQ INCREASED | 0.38 |
| 613 | ENSDARP00000117370  | cnp           | cnp-001           | 2',3'-cyclic nucleotide 3' phosphodiesterase                            | Cell cycle, division, growth and fate        | GQ INCREASED | 0.38 |
| 614 | ENSDARP00000093249  | dars          | dars-201          | Aspartyl-tRNA synthetase                                                | Protein Synthesis                            | GQ INCREASED | 0.38 |
| 615 | ENSDARP00000090277  | shmt2         | shmt2-201         | Serine hydroxymethyltransferase 2 (mitochondrial)                       | Protein Synthesis                            | GQ INCREASED | 0.37 |
| 616 | ENSDARP00000051290  | hexa          | hexa-001          | Hexosaminidase A (alpha polypeptide)                                    | Energy metabolism                            | GQ INCREASED | 0.37 |
| 617 | ENSDARP00000042258  | clybl         | clybl-001         | Citrate lyase subunit beta / citryl-CoA lyase                           | Energy metabolism                            | GQ INCREASED | 0.37 |
| 618 | ENSDARP00000025466  | cct4          | cct4-201          | Chaperonin containing Tcp1, subunit 4                                   | Protein Synthesis                            | GQ INCREASED | 0.37 |
| 619 | ENSDARP00000102802  | shmt2         | shmt2-202         | Serine hydroxymethyltransferase 2 (mitochondrial)                       | Protein Synthesis                            | GQ INCREASED | 0.37 |
| 620 | ENSDARP00000074247  | vdac3         | vdac3-201         | Voltage-dependent anion channel 3                                       | Other                                        | GQ INCREASED | 0.37 |
| 621 | ENSDARP000000121437 | vdac3         | vdac3-001         | Voltage-dependent anion channel 3                                       | Other                                        | GQ INCREASED | 0.37 |
| 622 | ENSDARP00000101564  | CU914772.1    | CU914772.1-201    | Glycosidase                                                             | Energy metabolism                            | GQ INCREASED | 0.37 |
| 623 | ENSDARP00000102398  | eif3s10       | eif3s10-001       | Eukaryotic translation initiation factor                                | Protein Synthesis                            | GQ INCREASED | 0.37 |
| 624 | ENSDARP00000052502  | nudcd1        | nudcd1-001        | NudC domain containing 1                                                | Other                                        | GQ INCREASED | 0.36 |
| 625 | ENSDARP00000114483  | kpna2         | kpna2-202         | Karyopherin alpha 2                                                     | Protein Synthesis                            | GQ INCREASED | 0.36 |
| 626 | ENSDARP00000055489  | kpna2         | kpna2-001         | Karyopherin alpha 2                                                     | Protein Synthesis                            | GQ INCREASED | 0.36 |
| 627 | ENSDARP00000117923  | eno3          | eno3-002          | Enolase 3                                                               | Energy metabolism                            | GQ INCREASED | 0.36 |
| 628 | ENSDARP00000014955  | man2b1        | man2b1-001        | Mannosidase, alpha, class 2B, member 1                                  | Energy metabolism                            | GQ INCREASED | 0.35 |
| 629 | ENSDARP00000006424  | agla          | agla-201          | Amylo-1, 6-glucosidase, 4-alpha-glucanotransferase a                    | Energy metabolism                            | GQ INCREASED | 0.35 |
| 630 | ENSDARP00000129094  | agla          | agla-001          | Amylo-1, 6-glucosidase, 4-alpha-glucanotransferase a                    | Energy metabolism                            | GQ INCREASED | 0.35 |
| 631 | ENSDARP00000008882  | me3           | me3-001           | Maic enzyme                                                             | Energy metabolism                            | GQ INCREASED | 0.35 |
| 632 | ENSDARP00000075198  | uba3          | uba3-001          | Ubiquitin-like modifier activating enzyme 3                             | Protein degradation and synthesis inhibition | GQ INCREASED | 0.35 |
| 633 | ENSDARP00000123254  | pcxb          | pcxb-001          | Pyruvate carboxylase b                                                  | Energy metabolism                            | GQ INCREASED | 0.35 |
| 634 | ENSDARP00000041577  | stx12         | stx12-201         | Syntaxin 12/13                                                          | Other                                        | GQ INCREASED | 0.35 |
| 635 | ENSDARP00000107227  | stx12         | stx12-001         | Syntaxin 12/13                                                          | Other                                        | GQ INCREASED | 0.35 |
| 636 | ENSDARP00000072874  | rps8a         | rps8a-001         | Ribosomal protein S8a                                                   | Protein Synthesis                            | GQ INCREASED | 0.35 |
| 637 | ENSDARP00000123532  | vdac3         | vdac3-002         | Voltage-dependent anion channel 3                                       | Cell cycle, division, growth and fate        | GQ INCREASED | 0.35 |
| 638 | ENSDARP00000003850  | akr7a3        | akr7a3-201        | Aldo-keto reductase family 7, member A3 -afatoxin B1 aldehyde reductase | REDOX/Detox related                          | GQ INCREASED | 0.35 |
| 639 | ENSDARP00000005719  | rps18         | rps18-001         | Small subunit ribosomal protein S18e                                    | Protein Synthesis                            | GQ INCREASED | 0.35 |
| 640 | ENSDARP00000008399  | drp2          | drp2-001          | Developmentally regulated GTP binding protein 2                         | Cell cycle, division, growth and fate        | GQ INCREASED | 0.35 |
| 641 | ENSDARP00000105639  | drp2          | drp2-002          | Developmentally regulated GTP binding protein 2                         | Cell cycle, division, growth and fate        | GQ INCREASED | 0.35 |
| 642 | ENSDARP00000112087  | zgc:158614    | zgc:158614-202    | Aifm4-apoptosis-inducing factor, mitochondrion-associated, 4            | Apoptosis related                            | GQ INCREASED | 0.34 |
| 643 | ENSDARP00000129014  | zgc:158614    | zgc:158614-001    | Aifm4-apoptosis-inducing factor, mitochondrion-associated, 4            | Apoptosis related                            | GQ INCREASED | 0.34 |
| 644 | ENSDARP00000110981  | dars          | dars-202          | Aspartyl-tRNA synthetase                                                | Protein Synthesis                            | GQ INCREASED | 0.33 |
| 645 | ENSDARP00000116150  | uap1          | uap1-002          | UDP-N-acteylglucosamine pyrophosphorylase 1                             | Cell cycle, division, growth and fate        | GQ INCREASED | 0.33 |
| 646 | ENSDARP00000005651  | rpl8          | rpl8-201          | Ribosomal protein L8                                                    | Protein Synthesis                            | GQ INCREASED | 0.33 |
| 647 | ENSDARP00000115147  | rpl8          | rpl8-001          | Ribosomal protein L8                                                    | Protein Synthesis                            | GQ INCREASED | 0.33 |
| 648 | ENSDARP00000006244  | dnpep         | dnpep-001         | Aspartyl aminopeptidase                                                 | Protein degradation and synthesis inhibition | GQ INCREASED | 0.33 |
| 649 | ENSDARP00000110484  | dnpep         | dnpep-201         | Aspartyl aminopeptidase                                                 | Protein degradation and synthesis inhibition | GQ INCREASED | 0.33 |
| 650 | ENSDARP00000027655  | mpep          | mpep-001          | Cytochrome-c peroxidase                                                 | Energy metabolism                            | GQ INCREASED | 0.33 |
| 651 | ENSDARP00000008660  | snmp200       | snmp200-001       | Small nuclear ribonucleoprotein 200kDa                                  | Protein Synthesis                            | GQ INCREASED | 0.32 |
| 652 | ENSDARP00000070479  | cpdb          | cpdb-001          | Carboxypeptidase D, b                                                   | Protein degradation and synthesis inhibition | GQ INCREASED | 0.30 |
| 653 | ENSDARP000000040031 | rtn4ip1       | rtn4ip1-001       | Reticulon 4 interacting protein 1                                       | Protein Synthesis                            | GQ INCREASED | 0.29 |
| 654 | ENSDARP00000124612  | glyctk        | glyctk-004        | Glycerate kinase                                                        | Energy metabolism                            | GQ INCREASED | 0.29 |
| 655 | ENSDARP00000121663  | clybl         | clybl-002         | Citrate lyase subunit beta / citryl-CoA lyase                           | Energy metabolism                            | GQ INCREASED | 0.29 |
| 656 | ENSDARP00000114273  | tceb2         | tceb2-001         | Transcription elongation factor B, polypeptide 2                        | Protein degradation and synthesis inhibition | GQ INCREASED | 0.29 |
| 657 | ENSDARP00000128442  | zgc:158614    | zgc:158614-003    | Aifm4-apoptosis-inducing factor, mitochondrion-associated, 4            | Apoptosis related                            | GQ INCREASED | 0.29 |
| 658 | ENSDARP00000055359  | tceb2         | tceb2-002         | Transcription elongation factor B, polypeptide 2                        | Protein degradation and synthesis inhibition | GQ INCREASED | 0.29 |
| 659 | ENSDARP000000084961 | rhoae         | rhoae-001         | Ras homolog gene family, member A                                       | Cell cycle, division, growth and fate        | GQ INCREASED | 0.29 |
| 660 | ENSDARP00000123757  | glyctk        | glyctk-003        | Glycerate kinase                                                        | Energy metabolism                            | GQ INCREASED | 0.29 |
| 661 | ENSDARP00000118814  | rpl23a        | rpl23a-004        | Large subunit ribosomal protein L32e                                    | Protein Synthesis                            | GQ INCREASED | 0.29 |
| 662 | ENSDARP00000104485  | zgc:158614    | zgc:158614-201    | Aifm4-apoptosis-inducing factor, mitochondrion-associated, 4            | Apoptosis related                            | GQ INCREASED | 0.29 |
| 663 | ENSDARP00000002234  | oxct1a        | oxct1a-001        | 3-oxoacid CoA transferase 1a                                            | Energy metabolism                            | GQ INCREASED | 0.29 |
| 664 | ENSDARP000000089234 | APOD (3 of 3) | APOD (3 of 3)-201 | Apolipoprotein D                                                        | Lipid metabolism                             | GQ INCREASED | 0.29 |
| 665 | ENSDARP00000113343  | APOD (3 of 3) | APOD (3 of 3)-001 | Apolipoprotein D                                                        | Lipid metabolism                             | GQ INCREASED | 0.29 |
| 666 | ENSDARP00000117077  | APOD (3 of 3) | APOD (3 of 3)-004 | Apolipoprotein D                                                        | Lipid metabolism                             | GQ INCREASED | 0.29 |
| 667 | ENSDARP00000123122  | APOD (3 of 3) | APOD (3 of 3)-003 | Apolipoprotein D                                                        | Lipid metabolism                             | GQ INCREASED | 0.29 |
| 668 | ENSDARP00000123418  | APOD (3 of 3) | APOD (3 of 3)-002 | Apolipoprotein D                                                        | Lipid metabolism                             | GQ INCREASED | 0.29 |
| 669 | ENSDARP00000035324  | selenbp1      | selenbp1-201      | Selenium binding protein 1                                              | Protein Synthesis                            | GQ INCREASED | 0.29 |
| 670 | ENSDARP00000062897  | ephx1         | ephx1-001         | Epoxide hydrolase 1, microsomal (xenobiotic)                            | REDOX/Detox related                          | GQ INCREASED | 0.29 |
| 671 | ENSDARP00000121216  | rhoad         | rhoad-002         | Ras homolog gene family, member A                                       | Cell cycle, division, growth and fate        | GQ INCREASED | 0.29 |

|     |                    |                   |                       |                                                                                                     |                                              |              |      |
|-----|--------------------|-------------------|-----------------------|-----------------------------------------------------------------------------------------------------|----------------------------------------------|--------------|------|
| 672 | ENSDARP0000006624  | rpl23a            | rpl23a-001            | Large subunit ribosomal protein L32e                                                                | Protein Synthesis                            | GQ INCREASED | 0.29 |
| 673 | ENSDARP0000022829  | dph5              | dph5-201              | Diphthine synthas                                                                                   | Protein Synthesis                            | GQ INCREASED | 0.29 |
| 674 | ENSDARP00000108734 | dph5              | dph5-202              | Diphthine synthas                                                                                   | Protein Synthesis                            | GQ INCREASED | 0.29 |
| 675 | ENSDARP00000111794 | dph5              | dph5-203              | Diphthine synthas                                                                                   | Protein Synthesis                            | GQ INCREASED | 0.29 |
| 676 | ENSDARP0000082459  | prmt5             | prmt5-201             | Protein arginine methyltransferase 5                                                                | Protein Synthesis                            | GQ INCREASED | 0.29 |
| 677 | ENSDARP00000116916 | rps18             | rps18-002             | Small subunit ribosomal protein S18e                                                                | Protein Synthesis                            | GQ INCREASED | 0.29 |
| 678 | ENSDARP00000122082 | rps18             | rps18-003             | Small subunit ribosomal protein S18e                                                                | Protein Synthesis                            | GQ INCREASED | 0.29 |
| 679 | ENSDARP0000052267  | pltpnb            | pltpnb-201            | Phosphatidylinositol transfer protein, beta, like                                                   | Lipid metabolism                             | GQ INCREASED | 0.29 |
| 680 | ENSDARP00000124921 | sept7b            | Novel                 | Cytoskeleton proteins                                                                               | Cell cycle, division, growth and fate        | GQ INCREASED | 0.29 |
| 681 | ENSDARP0000068657  | eif2a             | eif2a-201             | Eukaryotic translation initiation factor                                                            | Protein Synthesis                            | GQ INCREASED | 0.29 |
| 682 | ENSDARP00000125913 | eif2a             | eif2a-001             | Eukaryotic translation initiation factor                                                            | Protein Synthesis                            | GQ INCREASED | 0.29 |
| 683 | ENSDARP00000115411 | pdhb              | pdhb-002              | Pyruvate dehydrogenase (lipoamide) beta                                                             | Energy metabolism                            | GQ INCREASED | 0.29 |
| 684 | ENSDARP00000111558 | pltpnb            | pltpnb-202            | Phosphatidylinositol transfer protein, beta, like                                                   | Lipid metabolism                             | GQ INCREASED | 0.29 |
| 685 | ENSDARP00000124765 | glyctk            | glyctk-002            | Glycerate kinase                                                                                    | Energy metabolism                            | GQ INCREASED | 0.29 |
| 686 | ENSDARP00000109870 | hdac10            | hdac10-001            | Histone deacetylase 10                                                                              | Cell cycle, division, growth and fate        | GQ INCREASED | 0.29 |
| 687 | ENSDARP00000067534 | cap2              | cap2-201              | CAP, adenylate cyclase-associated protein, 2 (yeast)                                                | Other                                        | GQ INCREASED | 0.29 |
| 688 | ENSDARP00000106164 | cltcb             | cltcb-201             | Clathrin, heavy polypeptide b                                                                       | Protein degradation and synthesis inhibition | GQ INCREASED | 0.28 |
| 689 | ENSDARP00000105470 | cltcb             | cltcb-202             | Clathrin, heavy polypeptide b                                                                       | Protein degradation and synthesis inhibition | GQ INCREASED | 0.28 |
| 690 | ENSDARP00000119038 | cltcb             | cltcb-001             | Clathrin, heavy polypeptide b                                                                       | Protein degradation and synthesis inhibition | GQ INCREASED | 0.28 |
| 691 | ENSDARP0000077445  | acad9             | acad9-001             | Acyl-CoA dehydrogenase family, member 9                                                             | Energy metabolism                            | GQ INCREASED | 0.28 |
| 692 | ENSDARP00000103810 | prep              | prep-001              | Prolyl endopeptidase                                                                                | Protein degradation and synthesis inhibition | GQ INCREASED | 0.26 |
| 693 | ENSDARP0000048675  | prkar2aa          | prkar2aa-001          | Protein kinase, cAMP-dependent, regulatory, type II, alpha A                                        | Apoptosis related                            | GQ INCREASED | 0.26 |
| 694 | ENSDARP0000046358  | myh10             | myh10-201             | Myosin, heavy chain 10, non-muscle                                                                  | Cell cycle, division, growth and fate        | GQ INCREASED | 0.26 |
| 695 | ENSDARP00000125918 | myh10             | myh10-001             | Myosin, heavy chain 10, non-muscle                                                                  | Cell cycle, division, growth and fate        | GQ INCREASED | 0.26 |
| 696 | ENSDARP0000007817  | farsb             | farsb-001             | Phenylalanyl-tRNA synthetase, beta subunit                                                          | Protein Synthesis                            | GQ INCREASED | 0.26 |
| 697 | ENSDARP00000125771 | myh10             | myh10-002             | Myosin, heavy chain 10, non-muscle                                                                  | Cell cycle, division, growth and fate        | GQ INCREASED | 0.26 |
| 698 | ENSDARP00000116604 | selenbp1          | selenbp1-001          | Selenium binding protein 1                                                                          | Protein Synthesis                            | GQ INCREASED | 0.26 |
| 699 | ENSDARP00000039986 | pgm3              | pgm3-001              | Phosphoacetylglucosamine mutase                                                                     | Energy metabolism                            | GQ INCREASED | 0.26 |
| 700 | ENSDARP00000023819 | mccc2             | mccc2-001             | Methylcrotonoyl-CoA carboxylase 2 (beta)                                                            | Protein degradation and synthesis inhibition | GQ INCREASED | 0.25 |
| 701 | ENSDARP00000015404 | ehd1a             | ehd1a-201             | EH domain-containing protein 1                                                                      | Lipid metabolism                             | GQ INCREASED | 0.25 |
| 702 | ENSDARP00000057947 | anxa11a           | anxa11a-002           | Annexin A11a                                                                                        | Immune system related                        | GQ INCREASED | 0.24 |
| 703 | ENSDARP00000092551 | anxa11a           | anxa11a-001           | Annexin A11a                                                                                        | Immune system related                        | GQ INCREASED | 0.24 |
| 704 | ENSDARP00000052941 | serpinh2          | serpinh2              | Serpin peptidase inhibitor, clade H (heat shock protein 47), member 1, (collagen binding protein 1) | Other                                        | GQ INCREASED | 0.24 |
| 705 | ENSDARP00000105167 | serpinh2          | serpinh2              | Serpin peptidase inhibitor, clade H (heat shock protein 47), member 1, (collagen binding protein 1) | Other                                        | GQ INCREASED | 0.24 |
| 706 | ENSDARP00000125495 | GBE1 (2 of 2)     | GBE1 (2 of 2)-001     | Glucan (1,4-alpha)-, branching enzyme 1                                                             | Energy metabolism                            | GQ INCREASED | 0.24 |
| 707 | ENSDARP00000086805 | myh9b             | myh9b-201             | Myosin, heavy polypeptide 9b, non-muscle                                                            | Cell cycle, division, growth and fate        | GQ INCREASED | 0.24 |
| 708 | ENSDARP00000114437 | myh9b             | myh9b-001             | Myosin, heavy polypeptide 9b, non-muscle                                                            | Cell cycle, division, growth and fate        | GQ INCREASED | 0.23 |
| 709 | ENSDARP00000068053 | tes               | tes-201               | Testis derived transcript (3 LIM domains)                                                           | Cell cycle, division, growth and fate        | GQ INCREASED | 0.23 |
| 710 | ENSDARP00000111043 | supt16h           | supt16h-203           | Suppressor of Ty 16 homolog (S. cerevisiae) (FACT complex subunit SPT16)                            | Protein Synthesis                            | GQ INCREASED | 0.22 |
| 711 | ENSDARP00000039188 | lmf2b             | lmf2b-201             | Lipase maturation factor 2b                                                                         | Protein Synthesis                            | GQ INCREASED | 0.22 |
| 712 | ENSDARP00000100277 | supt16h           | supt16h-201           | Suppressor of Ty 16 homolog (S. cerevisiae) (FACT complex subunit SPT16)                            | Protein Synthesis                            | GQ INCREASED | 0.22 |
| 713 | ENSDARP00000109077 | supt16h           | supt16h-202           | Suppressor of Ty 16 homolog (S. cerevisiae) (FACT complex subunit SPT16)                            | Protein Synthesis                            | GQ INCREASED | 0.22 |
| 714 | ENSDARP00000014578 | gpib              | gpib-201              | Glucose phosphate isomerase b                                                                       | Energy metabolism                            | GQ INCREASED | 0.22 |
| 715 | ENSDARP00000089816 | atp6v1h           | atp6v1h-201           | V-type H <sup>+</sup> -transporting ATPase subunit H                                                | Energy metabolism                            | GQ INCREASED | 0.22 |
| 716 | ENSDARP00000113453 | atp6v1h           | atp6v1h-002           | V-type H <sup>+</sup> -transporting ATPase subunit H                                                | Energy metabolism                            | GQ INCREASED | 0.22 |
| 717 | ENSDARP00000068054 | tes               | tes-001               | Testis derived transcript (3 LIM domains)                                                           | Cell cycle, division, growth and fate        | GQ INCREASED | 0.22 |
| 718 | ENSDARP00000113128 | arcn1b            | arcn1b-002            | Archain 1b                                                                                          | Other                                        | GQ INCREASED | 0.22 |
| 719 | ENSDARP00000073441 | cpvl              | cpvl-001              | Vitellogenin carboxypeptidase-like protein                                                          | Protein degradation and synthesis inhibition | GQ INCREASED | 0.22 |
| 720 | ENSDARP00000094422 | sl:ch211-160d14.1 | sl:ch211-160d14.1-001 | Fascin                                                                                              | Cell cycle, division, growth and fate        | GQ INCREASED | 0.22 |
| 721 | ENSDARP00000024886 | atp6v1h           | atp6v1h-001           | V-type H <sup>+</sup> -transporting ATPase subunit H                                                | Energy metabolism                            | GQ INCREASED | 0.22 |
| 722 | ENSDARP00000074155 | nle1              | nle1-002              | Notchless homolog 1 (Drosophila)                                                                    | Protein Synthesis                            | GQ INCREASED | 0.22 |
| 723 | ENSDARP00000122687 | nle1              | nle1-001              | Notchless homolog 1 (Drosophila)                                                                    | Protein Synthesis                            | GQ INCREASED | 0.22 |
| 724 | ENSDARP00000083458 | lap3              | lap3-001              | Leucine aminopeptidase 3                                                                            | Protein degradation and synthesis inhibition | GQ INCREASED | 0.22 |
| 725 | ENSDARP00000058889 | ephx2             | ephx2-001             | Epoxide hydrolase 2, cytoplasmic                                                                    | Lipid metabolism                             | GQ INCREASED | 0.20 |
| 726 | ENSDARP00000117022 | cratb             | cratb-001             | Carnitine O-acetyltransferase b                                                                     | Energy metabolism                            | GQ INCREASED | 0.20 |
| 727 | ENSDARP00000129034 | eml2              | eml2-001              | Echinoderm microtubule associated protein like 2                                                    | Cell cycle, division, growth and fate        | GQ INCREASED | 0.20 |
| 728 | ENSDARP00000008223 | eml2              | eml2-201              | Echinoderm microtubule associated protein like 2                                                    | Cell cycle, division, growth and fate        | GQ INCREASED | 0.20 |
| 729 | ENSDARP00000101418 | GBE1 (2 of 2)     | GBE1 (2 of 2)-201     | Glucan (1,4-alpha)-, branching enzyme 1                                                             | Energy metabolism                            | GQ INCREASED | 0.19 |
| 730 | ENSDARP00000083382 | fbxo10            | fbxo10-001            | F-box protein 10                                                                                    | Protein degradation and synthesis inhibition | GQ INCREASED | 0.18 |
| 731 | ENSDARP00000094289 | cpne1             | cpne1-202             | Copine 1                                                                                            | Other                                        | GQ INCREASED | 0.18 |
| 732 | ENSDARP00000121695 | sl:ch211-93f2.1   | Novel                 | Carboxylic ester hydrolase                                                                          | REDOX/Detox related                          | GQ INCREASED | 0.18 |
| 733 | ENSDARP00000017582 | zc3h15            | zc3h15-001            | Zinc finger CCOH-type containing 15                                                                 | Protein Synthesis                            | GQ INCREASED | 0.18 |
| 734 | ENSDARP00000082086 | cpne1             | cpne1-201             | Copine 1                                                                                            | Other                                        | GQ INCREASED | 0.18 |
| 735 | ENSDARP0000007446  | cox4i1            | cox4i1-001            | Cytochrome c oxidase subunit IV isoform 1                                                           | Energy metabolism                            | GQ INCREASED | 0.17 |
| 736 | ENSDARP00000035261 | pfdn2             | pfdn2-001             | Prefoldin subunit 2                                                                                 | Protein Synthesis                            | GQ INCREASED | 0.17 |
| 737 | ENSDARP00000068644 | BX322787.1        | BX322787.1-201        | ATP-binding cassette, sub-family F, member 2-like                                                   | Protein Synthesis                            | GQ INCREASED | 0.17 |
| 738 | ENSDARP00000119994 | eno1a             | eno1a-002             | Enolase 1 a                                                                                         | Energy metabolism                            | GQ INCREASED | 0.17 |
| 739 | ENSDARP00000053867 | aldh9a1b          | aldh9a1b-001          | Aldehyde dehydrogenase 9 family, member A1b                                                         | Lipid metabolism                             | GQ INCREASED | 0.16 |

|     |                     |                    |                        |                                                                                            |                                              |              |      |
|-----|---------------------|--------------------|------------------------|--------------------------------------------------------------------------------------------|----------------------------------------------|--------------|------|
| 740 | ENSDARP0000034052   | pdc4a              | pdc4a-201              | Programmed cell death protein 4                                                            | Apoptosis related                            | GQ INCREASED | 0.16 |
| 741 | ENSDARP0000011311   | arcn1a             | arcn1a-001             | Archain 1a                                                                                 | Other                                        | GQ INCREASED | 0.15 |
| 742 | ENSDARP0000010190   | RAP1GDS1           | RAP1GDS1-201           | RAP1, GTP-GDP dissociation stimulator 1                                                    | Other                                        | GQ INCREASED | 0.15 |
| 743 | ENSDARP00000113140  | larsb              | larsb-001              | Leucy-lRNA synthetase b                                                                    | Protein Synthesis                            | GQ INCREASED | 0.15 |
| 744 | ENSDARP0000004838   | rcc2               | rcc2-001               | Regulator of chromosome condensation 2                                                     | Cell cycle, division, growth and fate        | GQ INCREASED | 0.15 |
| 745 | ENSDARP00000123019  | zp3c               | zp3c-001               | Zona pellucida protein                                                                     | Zona Pellucida proteins                      | GQ INCREASED | 0.15 |
| 746 | ENSDARP0000003359   | larsb              | larsb-201              | Leucy-lRNA synthetase b                                                                    | Protein Synthesis                            | GQ INCREASED | 0.14 |
| 747 | ENSDARP0000011011   | eif3d              | eif3d-201              | Eukaryotic translation initiation factor                                                   | Protein Synthesis                            | GQ INCREASED | 0.12 |
| 748 | ENSDARP00000112626  | oxc1a              | oxc1a-003              | 3-oxoacid CoA transferase 1a                                                               | Energy metabolism                            | GQ INCREASED | 0.12 |
| 749 | ENSDARP00000116681  | eif3d              | eif3d-001              | Eukaryotic translation initiation factor                                                   | Protein Synthesis                            | GQ INCREASED | 0.12 |
| 750 | ENSDARP00000056639  | abcf2a             | abcf2a-001             | ATP-binding cassette, sub-family F (GCN20), member 2a                                      | Protein Synthesis                            | GQ INCREASED | 0.12 |
| 751 | ENSDARP00000116165  | cltcb              | cltcb-003              | Clathrin, heavy polypeptide b                                                              | Protein degradation and synthesis inhibition | GQ INCREASED | 0.12 |
| 752 | ENSDARP00000003738  | eno1a              | eno1a-001              | Enolase 1 a                                                                                | Energy metabolism                            | GQ INCREASED | 0.12 |
| 753 | ENSDARP00000047901  | arcn1b             | arcn1b-001             | Archain 1b                                                                                 | Other                                        | GQ INCREASED | 0.12 |
| 754 | ENSDARP00000020181  | ehd1b              | ehd1b-001              | EH-domain containing 3                                                                     | Protein degradation and synthesis inhibition | GQ INCREASED | 0.11 |
| 755 | ENSDARP00000051798  | hdac1              | hdac1-001              | Histone deacetylase 1                                                                      | Cell cycle, division, growth and fate        | GQ INCREASED | 0.11 |
| 756 | ENSDARP00000095265  | si:ch211-93f2.1    | Novel                  | Carboxylic ester hydrolase-esterase lipase superfamily-drug metabolism                     | REDOX/Defox related                          | GQ INCREASED | 0.10 |
| 757 | ENSDARP000000021016 | zgc:158620         | Novel                  | Tubulin, beta 2A class IIa                                                                 | Cell cycle, division, growth and fate        | GQ UNIQUE    | -    |
| 758 | ENSDARP0000016957   | rpl36              | rpl36-001              | Ribosomal protein L36                                                                      | Protein Synthesis                            | GQ UNIQUE    | -    |
| 759 | ENSDARP00000124304  | rpl36              | rpl36-002              | Ribosomal protein L36                                                                      | Protein Synthesis                            | GQ UNIQUE    | -    |
| 760 | ENSDARP0000012767   |                    | aldh2.1-001            | Aldehyde dehydrogenase 2 family (mitochondrial), tandem duplicate 2                        | Energy metabolism                            | GQ UNIQUE    | -    |
| 761 | ENSDARP00000118282  | oxc1a              | oxc1a-004              | 3-oxoacid CoA transferase 1a                                                               | Lipid metabolism                             | GQ UNIQUE    | -    |
| 762 | ENSDARP00000109625  | tubb2              | tubb2-001 (novel)      | Beta tubulin                                                                               | Cell cycle, division, growth and fate        | GQ UNIQUE    | -    |
| 763 | ENSDARP00000108963  | CABZ01032488.1     | CABZ01032488.1-201     | Aldehyde dehydrogenase super family                                                        | Energy metabolism                            | GQ UNIQUE    | -    |
| 764 | ENSDARP00000110851  | FP102463.1         | FP102463.1-201         | Beta tubulin                                                                               | Cell cycle, division, growth and fate        | GQ UNIQUE    | -    |
| 765 | ENSDARP00000126192  | eif3d              | eif3d-004              | Eukaryotic translation initiation factor 3, subunit D                                      | Protein Synthesis                            | GQ UNIQUE    | -    |
| 766 | ENSDARP00000035541  | ube2l3a            | ube2l3a-201            | Ubiquitin-conjugating enzyme E2L 3a                                                        | Cell cycle, division, growth and fate        | GQ UNIQUE    | -    |
| 767 | ENSDARP00000054355  | pam16              | pam16-001              | Presequence translocase-associated motor 16 homolog (S. cerevisiae)                        | Energy metabolism                            | GQ UNIQUE    | -    |
| 768 | ENSDARP00000072006  | tuba1c             | tuba1c-001             | Tubulin alpha 1c                                                                           | Cell cycle, division, growth and fate        | GQ UNIQUE    | -    |
| 769 | ENSDARP00000016749  | me2                | me2-001                | Malic enzyme 2, NAD(+)-dependent, mitochondrial                                            | Energy metabolism                            | GQ UNIQUE    | -    |
| 770 | ENSDARP00000109682  | me2                | me2-201                | Malic enzyme 2, NAD(+)-dependent, mitochondrial                                            | Energy metabolism                            | GQ UNIQUE    | -    |
| 771 | ENSDARP00000127763  | HIST1H2BA (9 of 9) | HIST1H2BA (9 of 9)-001 | Histone                                                                                    | Cell cycle, division, growth and fate        | GQ UNIQUE    | -    |
| 772 | ENSDARP00000115350  | aldh9a1b           | aldh9a1b-002           | Aldehyde dehydrogenase 9 family, member A1b                                                | Energy metabolism                            | GQ UNIQUE    | -    |
| 773 | ENSDARP00000088020  | aldh2.2            | aldh2.2-202            | Aldehyde dehydrogenase 2 family (mitochondrial), tandem duplicate 2                        | Energy metabolism                            | GQ UNIQUE    | -    |
| 774 | ENSDARP00000088019  | aldh2.2            | aldh2.2-201            | Aldehyde dehydrogenase 2 family (mitochondrial), tandem duplicate 2                        | Energy metabolism                            | GQ UNIQUE    | -    |
| 775 | ENSDARP00000105094  | tuba1b             | tuba1b-001             | Tubulin alpha 1b                                                                           | Cell cycle, division, growth and fate        | GQ UNIQUE    | -    |
| 776 | ENSDARP00000083766  | dak                | dak-001                | Dihydroxyacetone kinase 2 homolog (S. cerevisiae)                                          | Energy metabolism                            | GQ UNIQUE    | -    |
| 777 | ENSDARP00000105448  | pkma               | pkma-202               | Pyruvate kinase, muscle, a                                                                 | Energy metabolism                            | GQ UNIQUE    | -    |
| 778 | ENSDARP00000105213  | CABZ01112387.1     | CABZ01112387.1-201     | Myosin 9 like-myosin N super family                                                        | Cell cycle, division, growth and fate        | GQ UNIQUE    | -    |
| 779 | ENSDARP00000009846  | arf1               | arf1-201               | ADP-ribosylation factor 1                                                                  | Cell cycle, division, growth and fate        | GQ UNIQUE    | -    |
| 780 | ENSDARP00000102498  | arf1               | arf1-202               | ADP-ribosylation factor 1                                                                  | Cell cycle, division, growth and fate        | GQ UNIQUE    | -    |
| 781 | ENSDARP00000128933  | ppp5c              | ppp5c-001              | Protein phosphatase 5, catalytic subunit                                                   | Cell cycle, division, growth and fate        | GQ UNIQUE    | -    |
| 782 | ENSDARP00000110687  | LOC101884557       | Novel                  | Myosin 9 like-myosin N super family                                                        | Cell cycle, division, growth and fate        | GQ UNIQUE    | -    |
| 783 | ENSDARP00000124733  | me2                | me2-002                | Malic enzyme 2, NAD(+)-dependent, mitochondrial                                            | Energy metabolism                            | GQ UNIQUE    | -    |
| 784 | ENSDARP00000114018  | prmt3              | prmt3-002              | Protein arginine methyltransferase 3                                                       | Protein Synthesis                            | GQ UNIQUE    | -    |
| 785 | ENSDARP00000003829  | prmt3              | prmt3-001              | Protein arginine methyltransferase 3                                                       | Protein Synthesis                            | GQ UNIQUE    | -    |
| 786 | ENSDARP00000122171  | rpl8               | rpl8-002               | Ribosomal protein L8                                                                       | Protein Synthesis                            | GQ UNIQUE    | -    |
| 787 | ENSDARP00000104932  | sh3d21             | Novel                  | Uncharacterized protein--SH3 domain-containing protein 21                                  | Cell cycle, division, growth and fate        | GQ UNIQUE    | -    |
| 788 | ENSDARP00000058636  | sh3d21             | Novel                  | Uncharacterized protein--SH3 domain-containing protein 21                                  | Cell cycle, division, growth and fate        | GQ UNIQUE    | -    |
| 789 | ENSDARP00000062517  | zgc:162356         | zgc:162356-001         | Glutathione S-transferase-glutathione metabolism-xenobiotics biodegradation and metabolism | Cell cycle, division, growth and fate        | GQ UNIQUE    | -    |
| 790 | ENSDARP00000104897  | dnlb               | dnlb-202               | Drebrin-like b                                                                             | Endosome-Lysosome related                    | GQ UNIQUE    | -    |
| 791 | ENSDARP00000112697  | sh3d21             | Novel                  | Uncharacterized protein--SH3 domain-containing protein 21                                  | Cell cycle, division, growth and fate        | GQ UNIQUE    | -    |
| 792 | ENSDARP00000122208  | ERAP1 (2 of 2)     | ERAP1 (2 of 2)-201     | Endoplasmic reticulum aminopeptidase 1                                                     | Immune system related                        | GQ UNIQUE    | -    |
| 793 | ENSDARP00000095260  | cox4l2             | cox4l2-001             | Cytochrome c oxidase subunit IV isoform 2                                                  | Energy metabolism                            | GQ UNIQUE    | -    |
| 794 | ENSDARP00000066122  | KPNA6              | KPNA6-201              | Karyopherin alpha 6 (importin alpha 7)                                                     | Protein Synthesis                            | GQ UNIQUE    | -    |
| 795 | ENSDARP00000117154  | dnpep              | dnpep-003              | Aspartyl aminopeptidase                                                                    | Protein degradation and synthesis inhibition | GQ UNIQUE    | -    |
| 796 | ENSDARP00000113894  | hars               | hars-002               | Histidyl-tRNA synthetase                                                                   | Protein Synthesis                            | GQ UNIQUE    | -    |
| 797 | ENSDARP00000051468  | si:ch211-186e20.7  | si:ch211-186e20.7-201  | Serpin super family-alpha antitrypsin domain                                               | Other                                        | GQ UNIQUE    | -    |
| 798 | ENSDARP00000123705  | si:ch211-186e20.7  | si:ch211-186e20.7-001  | Serpin super family-alpha antitrypsin domain                                               | Other                                        | GQ UNIQUE    | -    |
| 799 | ENSDARP00000114386  | eno2               | eno2-003               | Enolase 2                                                                                  | Energy metabolism                            | GQ UNIQUE    | -    |
| 800 | ENSDARP00000117079  | sh3d21             | Novel                  | Uncharacterized protein--SH3 domain-containing protein 21                                  | Cell cycle, division, growth and fate        | GQ UNIQUE    | -    |
| 801 | ENSDARP00000124373  | atp6v1h            | atp6v1h-004            | ATPase, H+ transporting, lysosomal, V1 subunit H                                           | Endosome-Lysosome related                    | GQ UNIQUE    | -    |
| 802 | ENSDARP00000027911  | dnlb               | dnlb-201               | Drebrin-like b                                                                             | Endosome-Lysosome related                    | GQ UNIQUE    | -    |
| 803 | ENSDARP0000014921   | zgc:92137          | zgc:92137-201          | alpha amylase                                                                              | Energy metabolism                            | GQ UNIQUE    | -    |
| 804 | ENSDARP00000038975  | dhdhl              | dhdhl-001              | Dihydrodiol dehydrogenase (dimeric), like                                                  | Energy metabolism                            | GQ UNIQUE    | -    |
| 805 | ENSDARP0000008466   | hpx                | hpx-201                | Hemopexin                                                                                  | Other                                        | GQ UNIQUE    | -    |
| 806 | ENSDARP00000111337  | hpx                | hpx-001                | Hemopexin                                                                                  | Other                                        | GQ UNIQUE    | -    |
| 807 | ENSDARP00000052498  | gla                | gla-201                | Galactosidase, alpha                                                                       | Lipid metabolism                             | GQ UNIQUE    | -    |

|     |                    |                   |                       |                                                                                        |                                              |           |   |
|-----|--------------------|-------------------|-----------------------|----------------------------------------------------------------------------------------|----------------------------------------------|-----------|---|
| 808 | ENSDARP0000075482  | sb.cb252          | sb.cb252-201          | ES1 protein homolog, mitochondrial                                                     | Other                                        | GQ UNIQUE | - |
| 809 | ENSDARP00000106738 | larsa             | larsa-201             | Leucyl-tRNA synthetase a                                                               | Protein Synthesis                            | GQ UNIQUE | - |
| 810 | ENSDARP00000097448 | trmt112           | trmt112-001           | TRNA methyltransferase 11-2 homolog (S. cerevisiae)                                    | Protein Synthesis                            | GQ UNIQUE | - |
| 811 | ENSDARP00000114835 | gla               | gla-001               | Galactosidase, alpha                                                                   | Lipid metabolism                             | GQ UNIQUE | - |
| 812 | ENSDARP00000062263 | sdhb              | sdhb-201              | Succinate dehydrogenase complex, subunit B, iron sulfur (lp)                           | Energy metabolism                            | GQ UNIQUE | - |
| 813 | ENSDARP00000019062 | vars              | vars-201              | Valyl-tRNA synthetase                                                                  | Protein Synthesis                            | GQ UNIQUE | - |
| 814 | ENSDARP00000120746 | ces3              | ces3-001              | Carboxylesterase 3                                                                     | Lipid metabolism                             | GQ UNIQUE | - |
| 815 | ENSDARP00000107172 | ces3              | ces3-203              | Carboxylesterase 3                                                                     | Lipid metabolism                             | GQ UNIQUE | - |
| 816 | ENSDARP00000021453 | amy2a             | amy2a-001             | Amylase, alpha 2A, pancreatic                                                          | Energy metabolism                            | GQ UNIQUE | - |
| 817 | ENSDARP00000091190 | lancl2            | lancl2-201            | LanC lantibiotic synthetase component C-like 2 (bacterial)                             | Immune system related                        | GQ UNIQUE | - |
| 818 | ENSDARP00000114912 | lancl2            | lancl2-001            | LanC lantibiotic synthetase component C-like 2 (bacterial)                             | Immune system related                        | GQ UNIQUE | - |
| 819 | ENSDARP00000121084 | dnpep             | dnpep-002             | Aspartyl aminopeptidase                                                                | Protein degradation and synthesis inhibition | GQ UNIQUE | - |
| 820 | ENSDARP00000046625 | PRKAR2B           | PRKAR2B-201           | Protein kinase, cAMP-dependent, regulatory, type II, beta                              | Energy metabolism                            | GQ UNIQUE | - |
| 821 | ENSDARP00000023098 | dlat              | dlat-001              | Dihydropyrimidine S-acetyltransferase (E2 component of pyruvate dehydrogenase complex) | Energy metabolism                            | GQ UNIQUE | - |
| 822 | ENSDARP00000091998 | ddx39aa           | ddx39aa-201           | DEAD (Asp-Glu-Ala-Asp) box polypeptide 39Aa                                            | Cell cycle, division, growth and fate        | GQ UNIQUE | - |
| 823 | ENSDARP00000115525 | oxsr1b            | oxsr1b-001            | Oxidative-stress responsive 1b                                                         | Cell cycle, division, growth and fate        | GQ UNIQUE | - |
| 824 | ENSDARP00000126065 | sesn2             | sesn2-003             | Sestrin 2                                                                              | Cell cycle, division, growth and fate        | GQ UNIQUE | - |
| 825 | ENSDARP00000119784 | zgc:165539        | zgc:165539-003        | Mucin 5Ac                                                                              | Immune system related                        | GQ UNIQUE | - |
| 826 | ENSDARP00000117895 | ITPA (2 of 2)     | ITPA (2 of 2)-201     | Inosine triphosphatase (nucleoside triphosphate pyrophosphatase)                       | Cell cycle, division, growth and fate        | GQ UNIQUE | - |
| 827 | ENSDARP00000123429 | g3bp1             | g3bp1-002             | GTPase activating protein (SH3 domain) binding protein 1                               | Cell cycle, division, growth and fate        | GQ UNIQUE | - |
| 828 | ENSDARP00000016959 | carm1             | carm1-001             | Coactivator-associated arginine methyltransferase 1                                    | Protein Synthesis                            | GQ UNIQUE | - |
| 829 | ENSDARP00000074674 | itpa              | itpa-001              | Inosine triphosphatase (nucleoside triphosphate pyrophosphatase)                       | Cell cycle, division, growth and fate        | GQ UNIQUE | - |
| 830 | ENSDARP00000105903 | anxa6             | anxa6-203             | Annexin A6                                                                             | Endosome-Lysosome related                    | GQ UNIQUE | - |
| 831 | ENSDARP00000006047 | ugg2a             | ugg2a-001             | UDP-glucose pyrophosphorylase 2a                                                       | Energy metabolism                            | GQ UNIQUE | - |
| 832 | ENSDARP00000076180 | rab25a            | rab25a-201            | RAB25, member RAS oncogene family a                                                    | Oncogenesis related                          | GQ UNIQUE | - |
| 833 | ENSDARP00000008513 | ddx39aa           | ddx39aa-001           | DEAD (Asp-Glu-Ala-Asp) box polypeptide 39Aa                                            | Cell cycle, division, growth and fate        | GQ UNIQUE | - |
| 834 | ENSDARP00000093160 | sesn2             | sesn2-001             | Sestrin 2                                                                              | Cell cycle, division, growth and fate        | GQ UNIQUE | - |
| 835 | ENSDARP00000087672 | papl              | papl-201              | Iron/zinc purple acid phosphatase-like protein                                         | Protein degradation and synthesis inhibition | GQ UNIQUE | - |
| 836 | ENSDARP00000114865 | eef1da            | eef1da-005            | Elongation factor-1, delta, a                                                          | Protein Synthesis                            | GQ UNIQUE | - |
| 837 | ENSDARP00000122064 | pold2             | pold2-001             | Polymerase (DNA directed), delta 2, regulatory subunit                                 | Cell cycle, division, growth and fate        | GQ UNIQUE | - |
| 838 | ENSDARP00000125677 | sesn2             | sesn2-002             | Sestrin 2                                                                              | Cell cycle, division, growth and fate        | GQ UNIQUE | - |
| 839 | ENSDARP00000041675 | tph1a             | tph1a-201             | Tryptophan hydroxylase 1 (tryptophan 5-monoxygenase) a                                 | Protein Synthesis                            | GQ UNIQUE | - |
| 840 | ENSDARP00000112644 | sh3d21            | Novel                 | SH3 domain-containing protein 21                                                       | Cell cycle, division, growth and fate        | GQ UNIQUE | - |
| 841 | ENSDARP00000067158 | tph1a             | tph1a-202             | Tryptophan hydroxylase 1 (tryptophan 5-monoxygenase) a                                 | Protein Synthesis                            | GQ UNIQUE | - |
| 842 | ENSDARP00000113340 | pold2             | pold2-002             | Polymerase (DNA directed), delta 2, regulatory subunit                                 | Cell cycle, division, growth and fate        | GQ UNIQUE | - |
| 843 | ENSDARP00000125959 | carm1             | carm1-003             | Coactivator-associated arginine methyltransferase 1                                    | Protein Synthesis                            | GQ UNIQUE | - |
| 844 | ENSDARP00000052682 | c3c               | c3c-001               | Complement component c3c                                                               | Immune system related                        | GQ UNIQUE | - |
| 845 | ENSDARP00000083043 | rangap1a          | rangap1a-001          | RAN GTPase activating protein 1a                                                       | Cell cycle, division, growth and fate        | GQ UNIQUE | - |
| 846 | ENSDARP00000112996 | phex              | phex-002              | Phosphate regulating gene with homologues to endopeptidases on the X chromosome        | Protein degradation and synthesis inhibition | GQ UNIQUE | - |
| 847 | ENSDARP00000009876 | memo1             | memo1-001             | Mediator of cell motility 1                                                            | Cell cycle, division, growth and fate        | GQ UNIQUE | - |
| 848 | ENSDARP00000025917 | ppp6c             | ppp6c-001             | Protein phosphatase 6, catalytic subunit                                               | Cell cycle, division, growth and fate        | GQ UNIQUE | - |
| 849 | ENSDARP00000023871 | fij13639          | fij13639-201          | Uncharacterized protein--short chain dehydrogenase/reductase                           | Other                                        | GQ UNIQUE | - |
| 850 | ENSDARP00000113500 | ndufaf5           | ndufaf5-001           | NADH dehydrogenase (ubiquinone) complex 1, assembly factor 5                           | Energy metabolism                            | GQ UNIQUE | - |
| 851 | ENSDARP00000104359 | si:ch211-165b10.3 | si:ch211-165b10.3-201 | Uncharacterized protein                                                                | Other                                        | GQ UNIQUE | - |
| 852 | ENSDARP00000098664 | ME1 (2 of 2)      | ME1 (2 of 2)-201      | Malic enzyme 1, NADP(+)-dependent, cytosolic                                           | Energy metabolism                            | GQ UNIQUE | - |
| 853 | ENSDARP00000124689 | nmt1a             | nmt1a-002             | N-myristoyltransferase 1a                                                              | Other                                        | GQ UNIQUE | - |
| 854 | ENSDARP00000128976 | si:ch211-165b10.3 | si:ch211-165b10.3-001 | Uncharacterized protein                                                                | Other                                        | GQ UNIQUE | - |
| 855 | ENSDARP00000076538 | PPP2R5C (2 of 2)  | PPP2R5C (2 of 2)-201  | Protein phosphatase 2, regulatory subunit B., gamma                                    | Cell cycle, division, growth and fate        | GQ UNIQUE | - |
| 856 | ENSDARP00000026627 | anxa6             | anxa6-201             | Annexin A6                                                                             | Endosome-Lysosome related                    | GQ UNIQUE | - |
| 857 | ENSDARP00000081541 | EIF4G1 (1 of 3)   | EIF4G1 (1 of 3)-201   | Eukaryotic translation initiation factor 4 gamma, 1                                    | Protein Synthesis                            | GQ UNIQUE | - |
| 858 | ENSDARP00000081554 | EIF4G1 (1 of 3)   | EIF4G1 (1 of 3)-002   | Eukaryotic translation initiation factor 4 gamma, 1                                    | Protein Synthesis                            | GQ UNIQUE | - |
| 859 | ENSDARP00000098745 | nomo              | nomo-201              | Nodal modulator                                                                        | Cell cycle, division, growth and fate        | GQ UNIQUE | - |
| 860 | ENSDARP00000128647 | nomo              | nomo-001              | Nodal modulator                                                                        | Cell cycle, division, growth and fate        | GQ UNIQUE | - |
| 861 | ENSDARP00000010925 | ddx39ab           | ddx39ab-001           | DEAD (Asp-Glu-Ala-Asp) box polypeptide 39Ab                                            | Cell cycle, division, growth and fate        | GQ UNIQUE | - |
| 862 | ENSDARP00000052354 | ddx39b            | ddx39b-001            | DEAD (Asp-Glu-Ala-Asp) box polypeptide 39Ab                                            | Cell cycle, division, growth and fate        | GQ UNIQUE | - |
| 863 | ENSDARP00000069703 | me1               | me1-201               | Malic enzyme 1, NADP(+)-dependent, cytosolic                                           | Energy metabolism                            | GQ UNIQUE | - |
| 864 | ENSDARP00000012808 | pah               | pah-001               | Phenylalanine hydroxylase                                                              | Protein degradation and synthesis inhibition | GQ UNIQUE | - |
| 865 | ENSDARP00000042296 | kdelc1            | kdelc1-001            | KDEL (Lys-Asp-Glu-Leu) containing 1                                                    | Protein Synthesis                            | GQ UNIQUE | - |
| 866 | ENSDARP00000047072 | oxsr1a            | oxsr1a-001            | Oxidative-stress responsive 1a                                                         | Cell cycle, division, growth and fate        | GQ UNIQUE | - |
| 867 | ENSDARP00000055010 | PDILT             | PDILT-001             | Protein disulfide isomerase-like, testis expressed                                     | Protein Synthesis                            | GQ UNIQUE | - |
| 868 | ENSDARP00000066974 | impdh1b           | impdh1b-002           | Inosine 5,-phosphate dehydrogenase 1b                                                  | Cell cycle, division, growth and fate        | GQ UNIQUE | - |
| 869 | ENSDARP00000074184 | oxct1b            | oxct1b-001            | 3-oxoacid CoA transferase 1b                                                           | Lipid metabolism                             | GQ UNIQUE | - |
| 870 | ENSDARP00000066972 | impdh1b           | impdh1b-001           | Inosine 5,-phosphate dehydrogenase 1b                                                  | Cell cycle, division, growth and fate        | GQ UNIQUE | - |
| 871 | ENSDARP00000092803 | kpnas5            | kpnas5-001            | Karyopherin alpha 5 (importin alpha 6)                                                 | Protein Synthesis                            | GQ UNIQUE | - |
| 872 | ENSDARP00000019185 | impdh1a           | impdh1a-001           | Inosine 5,-phosphate dehydrogenase 1a                                                  | Cell cycle, division, growth and fate        | GQ UNIQUE | - |
| 873 | ENSDARP00000125968 | usp7              | usp7-001              | Ubiquitin specific peptidase 7 (herpes virus-associated)                               | Cell cycle, division, growth and fate        | GQ UNIQUE | - |
| 874 | ENSDARP00000002502 | usp7              | usp7-201              | Ubiquitin specific peptidase 7 (herpes virus-associated)                               | Cell cycle, division, growth and fate        | GQ UNIQUE | - |
| 875 | ENSDARP00000096118 | anxa6             | anxa6-202             | Annexin A6                                                                             | Endosome-Lysosome related                    | GQ UNIQUE | - |

|     |                     |          |              |                                                      |                                       |           |   |
|-----|---------------------|----------|--------------|------------------------------------------------------|---------------------------------------|-----------|---|
| 876 | ENSDARP00000124518  | anxa6    | anxa6-001    | Annexin A6                                           | Endosome-Lysosome related             | GQ UNIQUE | - |
| 877 | ENSDARP00000014963  | ppp2r5cb | ppp2r5cb-201 | Protein phosphatase 2, regulatory subunit B, gamma b | Cell cycle, division, growth and fate | GQ UNIQUE | - |
| 878 | ENSDARP000000101961 | ppp2r5cb | ppp2r5cb-202 | Protein phosphatase 2, regulatory subunit B, gamma b | Cell cycle, division, growth and fate | GQ UNIQUE | - |
| 879 | ENSDARP00000103928  | ppp2r5cb | ppp2r5cb-001 | Protein phosphatase 2, regulatory subunit B, gamma b | Cell cycle, division, growth and fate | GQ UNIQUE | - |
| 880 | ENSDARP00000012056  | ctps1b   | ctps1b-001   | CTP synthase 1b                                      | Cell cycle, division, growth and fate | GQ UNIQUE | - |
| 881 | ENSDARP00000028051  | lmnl3    | lmnl3-001    | Lamin L3                                             | Cell cycle, division, growth and fate | GQ UNIQUE | - |
| 882 | ENSDARP00000070709  | ctps1b   | ctps1b-201   | CTP synthase 1b                                      | Cell cycle, division, growth and fate | GQ UNIQUE | - |
| 883 | ENSDARP00000092744  | me1      | me1-002      | Malic enzyme 1, NADP(+)-dependent, cytosolic         | Energy metabolism                     | GQ UNIQUE | - |
| 884 | ENSDARP000000113885 | me1      | me1-001      | Malic enzyme 1, NADP(+)-dependent, cytosolic         | Energy metabolism                     | GQ UNIQUE | - |
| 885 | ENSDARP000000120790 | kpna1    | kpna1-001    | Karyopherin alpha 1 (importin alpha 5)               | Protein Synthesis                     | GQ UNIQUE | - |
| 886 | ENSDARP00000091935  | impdh1a  | impdh1a-201  | Inosine 5-phosphate dehydrogenase 1a                 | Cell cycle, division, growth and fate | GQ UNIQUE | - |
| 887 | ENSDARP00000059197  | PARP14   | PARP14-201   | Poly (ADP-ribose) polymerase family, member 14       | Apoptosis related                     | GQ UNIQUE | - |
| 888 | ENSDARP00000016922  | aglb     | aglb-001     | Amylo-1, 6-glucosidase, 4-alpha-glucanotransferase b | Energy metabolism                     | GQ UNIQUE | - |
| 889 | ENSDARP00000098492  | zfat     | zfat-201     | Zinc finger and AT hook domain containing            | Protein Synthesis                     | GQ UNIQUE | - |
| 890 | ENSDARP000000127519 | zfat     | zfat-001     | Zinc finger and AT hook domain containing            | Protein Synthesis                     | GQ UNIQUE | - |
| 891 | ENSDARP00000025533  | tlm1     | tlm1-201     | Talin 1                                              | Cell cycle, division, growth and fate | GQ UNIQUE | - |
| 892 | ENSDARP00000072597  | tlm1     | tlm1-001     | Talin 1                                              | Cell cycle, division, growth and fate | GQ UNIQUE | - |
