# Supplementary material for: Scrambled eggs: Proteomic portraits and novel biomarkers of egg quality in zebrafish (Danio rerio)
Source: PubMed Central journal article supplement (PMC5690628; doi:10.1371/journal.pone.0188084), 2017-11-16
Supplement: pone.0188084.s002.pdf [file pone.0188084.s002.pdf]

**S2 Table. Proteins differentially regulated in the Multiple Samples Experiment.** List of the 274 proteins from the Multiple Samples Experiment that were considered to be differentially regulated between egg quality groups and whose distribution among various functional categories is illustrated in Fig 2b. These include proteins detected only in poor quality eggs (PQ UNIQUE, n=93), proteins in poor quality eggs with N-SC increased  $\geq 2$ -fold relative to values for good quality eggs (PQ INCREASED, n=58), proteins detected only in good quality eggs (GQ UNIQUE, n=90), and proteins in good quality eggs with N-SC increased  $\geq 2$ -fold relative to values for poor quality eggs (GQ INCREASED, n=32). For each protein, the Ensembl Protein ID and associated gene, transcript and protein name, functional category (see Fig 2b), regulation (UNIQUE or INCREASED), fold-difference in N-SC between egg quality groups (if available), and fraction in which the protein was originally detected (LMW, low molecular weight; HMW, high molecular weight) is shown. Color shading corresponds to that used to designate functional categories in Fig 2.

| ENSEMBL Protein ID | Associated Gene Name | Associated Transcript Name | Protein Full Name                                                                           | Functional Category                          | Regulation | Fold Difference | Fraction |
|--------------------|----------------------|----------------------------|---------------------------------------------------------------------------------------------|----------------------------------------------|------------|-----------------|----------|
| 1                  | si:ch211-161h7.6     | si:ch211-161h7.6-002       | cst14a.2                                                                                    | Other                                        | PQ UNIQUE  | -               | LMW      |
| 2                  | si:ch211-161h7.6     | si:ch211-161h7.6-001       | cst14a.2                                                                                    | Other                                        | PQ UNIQUE  | -               | LMW      |
| 3                  | dap1b                | dap1b-201                  | Death associated protein 1b                                                                 | Apoptosis related                            | PQ UNIQUE  | -               | LMW      |
| 4                  | dap1b                | dap1b-202                  | Death associated protein b-apoptotic signaling pathway                                      | Apoptosis related                            | PQ UNIQUE  | -               | LMW      |
| 5                  | rab7                 | rab7-001                   | RAB7, member RAS oncogene family                                                            | Endosome-Lysosome related                    | PQ UNIQUE  | -               | LMW      |
| 6                  | si:dkeyp-20e4.8      | si:dkeyp-20e4.8-001        | Uncharacterized protein                                                                     | Other                                        | PQ UNIQUE  | -               | LMW      |
| 7                  | rpl23                | rpl23-001                  | Ribosomal protein L23                                                                       | Protein synthesis                            | PQ UNIQUE  | -               | LMW      |
| 8                  | rpl30                | rpl30-002                  | Ribosomal protein L30                                                                       | Protein synthesis                            | PQ UNIQUE  | -               | LMW      |
| 9                  | rpl30                | rpl30-001                  | Ribosomal protein L30                                                                       | Protein synthesis                            | PQ UNIQUE  | -               | LMW      |
| 10                 | Rab7-like, rab7b,    | Rab7-like, rab7b,          | Rab7-like, rab7b                                                                            | Endosome-Lysosome related                    | PQ UNIQUE  | -               | LMW      |
| 11                 | Rab7-like            | Rab7-like                  | Rab7-like                                                                                   | Endosome-Lysosome related                    | PQ UNIQUE  | -               | LMW      |
| 12                 | apom                 | apom-002                   | Apolipoprotein M                                                                            | Immune system related                        | PQ UNIQUE  | -               | LMW      |
| 13                 | zgc:100918           | Novel transcript           | Uncharacterized protein-Rab7-like, ras-related, protein                                     | Endosome-Lysosome related                    | PQ UNIQUE  | -               | LMW      |
| 14                 | zgc:100918           | Novel transcript           | Uncharacterized protein-Rab7a-like, ras-related, protein                                    | Endosome-Lysosome related                    | PQ UNIQUE  | -               | LMW      |
| 15                 | apom                 | apom-003                   | Apolipoprotein M                                                                            | Immune system related                        | PQ UNIQUE  | -               | LMW      |
| 16                 | rab11a               | rab11a-001                 | RAB11a, member RAS oncogene family, like                                                    | Endosome-Lysosome related                    | PQ UNIQUE  | -               | LMW      |
| 17                 | apom                 | apom-001                   | Apolipoprotein M                                                                            | Immune system related                        | PQ UNIQUE  | -               | LMW      |
| 18                 | ACTC1 (2 of 2)       | ACTC1 (2 of 2)-001         | Actin, alpha, cardiac muscle 1a                                                             | Cell cycle, division, growth and fate        | PQ UNIQUE  | -               | LMW      |
| 19                 | si:ch211-226h8.8     | si:ch211-226h8.8-201       | Uncharacterized protein containing SUEL type lectin domain                                  | Lectins                                      | PQ UNIQUE  | -               | LMW      |
| 20                 | fkbp1aa              | fkbp1aa-001                | FK506 binding protein 1Aa                                                                   | Protein synthesis                            | PQ UNIQUE  | -               | LMW      |
| 21                 | fkbp1aa              | fkbp1aa-003                | FK506 binding protein 1Aa                                                                   | Protein synthesis                            | PQ UNIQUE  | -               | LMW      |
| 22                 | fkbp1aa              | fkbp1aa-002                | FK506 binding protein 1Aa                                                                   | Protein synthesis                            | PQ UNIQUE  | -               | LMW      |
| 23                 | sri                  | sri-001                    | Sorcin                                                                                      | Protein degradation and synthesis inhibition | PQ UNIQUE  | -               | LMW      |
| 24                 | si:ch211-226h8.8     | si:ch211-226h8.8-001       | Uncharacterized protein-Gal lectin superfamily                                              | Lectins                                      | PQ UNIQUE  | -               | LMW      |
| 25                 | zgc:172218           | Novel transcript           | Uncharacterized protein containing 3SUEL type lectin domains                                | Lectins                                      | PQ UNIQUE  | -               | LMW      |
| 26                 | si:ch211-226h8.11    | si:ch211-226h8.11-001      | L-rhamnose-binding lectin CSL3-like isoform X1                                              | Lectins                                      | PQ UNIQUE  | -               | LMW      |
| 27                 | ITIH4                | ITIH4-201                  | Inter-alpha-trypsin inhibitor heavy chain family member 4                                   | Other                                        | PQ UNIQUE  | -               | LMW      |
| 28                 | snrpd2               | snrpd2-001                 | Small nuclear ribonucleoprotein D2 polypeptide                                              | Protein synthesis                            | PQ UNIQUE  | -               | LMW      |
| 29                 | rpl31                | rpl31-201                  | Ribosomal protein L31                                                                       | Protein synthesis                            | PQ UNIQUE  | -               | LMW      |
| 30                 | rpl31                | rpl31-002                  | Ribosomal protein L31                                                                       | Protein synthesis                            | PQ UNIQUE  | -               | LMW      |
| 31                 | rpl31                | rpl31-001                  | Ribosomal protein L31                                                                       | Protein synthesis                            | PQ UNIQUE  | -               | LMW      |
| 32                 | snx3                 | snx3-003                   | Sorting nexin 3                                                                             | Endosome-Lysosome related                    | PQ UNIQUE  | -               | LMW      |
| 33                 | actb2                | actb2-002                  | Actin, beta 2                                                                               | Cell cycle, division, growth and fate        | PQ UNIQUE  | -               | LMW      |
| 34                 | actb1                | actb1-002                  | Actin, beta 1                                                                               | Cell cycle, division, growth and fate        | PQ UNIQUE  | -               | LMW      |
| 35                 | CABZ01044980.1       | CABZ01044980.1-201         | Zona pellucida sperm-binding protein 3-like precursor                                       | Zona Pellucida proteins                      | PQ UNIQUE  | -               | LMW      |
| 36                 | park7                | park7-002                  | Parkinson protein 7                                                                         | REDOX/Detox related                          | PQ UNIQUE  | -               | LMW      |
| 37                 | snx3                 | snx3-001                   | Sorting nexin 3                                                                             | Endosome-Lysosome related                    | PQ UNIQUE  | -               | LMW      |
| 38                 | cp                   | cp-002                     | Ceruloplasmin                                                                               | REDOX/Detox related                          | PQ UNIQUE  | -               | LMW      |
| 39                 | cp                   | cp-003                     | Ceruloplasmin                                                                               | REDOX/Detox related                          | PQ UNIQUE  | -               | LMW      |
| 40                 | ube2nb               | ube2nb-001                 | Ubiquitin-conjugating enzyme E2Nb                                                           | Protein degradation and synthesis inhibition | PQ UNIQUE  | -               | LMW      |
| 41                 | lect2l               | lect2l-001                 | Leukocyte cell-derived chemotaxin 2 like                                                    | Immune system related                        | PQ UNIQUE  | -               | LMW      |
| 42                 | cp                   | cp-202                     | Ceruloplasmin                                                                               | REDOX/Detox related                          | PQ UNIQUE  | -               | LMW      |
| 43                 | cdh1                 | cdh1-001                   | Cadherin 1, type 1, E-cadherin (epithelial)                                                 | Cell cycle, division, growth and fate        | PQ UNIQUE  | -               | LMW      |
| 44                 | MFAP4 (12 of 14)     | MFAP4 (12 of 14)-201       | Microfibrillar-associated protein 4                                                         | Cell cycle, division, growth and fate        | PQ UNIQUE  | -               | LMW      |
| 45                 | cdh1                 | cdh1-201                   | Cadherin 1, type 1, E-cadherin (epithelial)                                                 | Cell cycle, division, growth and fate        | PQ UNIQUE  | -               | LMW      |
| 46                 | cp                   | cp-201                     | Ceruloplasmin                                                                               | REDOX/Detox related                          | PQ UNIQUE  | -               | LMW      |
| 47                 | CU469531.2           | CU469531.2-201             | Small GTPase mediated signal transduction-protein transport                                 | Other                                        | PQ UNIQUE  | -               | LMW      |
| 48                 | cdc42                | cdc42-001                  | Cell division cycle 42                                                                      | Cell cycle, division, growth and fate        | PQ UNIQUE  | -               | LMW      |
| 49                 | zgc:162356           | zgc:162356-001             | Glutathione S-transferase rho                                                               | REDOX/Detox related                          | PQ UNIQUE  | -               | LMW      |
| 50                 | acta1a               | acta1a-001                 | Actin alpha 1 a skeletal muscle                                                             | Cell cycle, division, growth and fate        | PQ UNIQUE  | -               | LMW      |
| 51                 | actc1b               | actc1b-201                 | Actin, alpha, cardiac muscle 1b                                                             | Cell cycle, division, growth and fate        | PQ UNIQUE  | -               | LMW      |
| 52                 | acta1b               | acta1b-001                 | Actin, alpha 1b, skeletal muscle                                                            | Cell cycle, division, growth and fate        | PQ UNIQUE  | -               | LMW      |
| 53                 | ywhaqb               | ywhaqb-001                 | Tyrosine 3-monooxygenase/tryptophan 5-monooxygenase activation protein, theta polypeptide b | REDOX/Detox related                          | PQ UNIQUE  | -               | LMW      |

|     |                    |                   |                       |                                                                                             |                                              |              |      |     |
|-----|--------------------|-------------------|-----------------------|---------------------------------------------------------------------------------------------|----------------------------------------------|--------------|------|-----|
| 54  | ENSDARP0000062382  | ywhaqa            | ywhaqa-001            | Tyrosine 3-monooxygenase/tryptophan 5-monooxygenase activation protein, theta polypeptide b | REDOX/Detox related                          | PQ UNIQUE    | -    | LMW |
| 55  | ENSDARP0000074935  | ywhag1            | ywhag1-001            | 3-monooxygenase/tryptophan 5-monooxygenase activation protein, gamma polypeptide 1          | Cell cycle, division, growth and fate        | PQ UNIQUE    | -    | LMW |
| 56  | ENSDARP0000096898  | ywhag2            | ywhag2-001            | 3-monooxygenase/tryptophan 5-monooxygenase activation protein, gamma polypeptide 2          | Cell cycle, division, growth and fate        | PQ UNIQUE    | -    | LMW |
| 57  | ENSDARP0000040421  | bhmt              | bhmt-201              | Betaine-homocysteine methyltransferase                                                      | Other                                        | PQ UNIQUE    | -    | LMW |
| 58  | ENSDARP00000104071 | f2                | f2-002                | Coagulation factor II (thrombin)                                                            | Immune system related                        | PQ UNIQUE    | -    | LMW |
| 59  | ENSDARP0000052324  | f2                | f2-001                | Coagulation factor II (thrombin)                                                            | Immune system related                        | PQ UNIQUE    | -    | LMW |
| 60  | ENSDARP0000015293  | cp                | cp-001                | Ceruloplasmin                                                                               | REDOX/Detox related                          | PQ UNIQUE    | -    | LMW |
| 61  | ENSDARP00000109575 | si:ch1073-263o8.2 | si:ch1073-263o8.2-201 | Uncharacterized protein                                                                     | Other                                        | PQ UNIQUE    | -    | LMW |
| 62  | ENSDARP00000125992 | si:ch1073-263o8.2 | si:ch1073-263o8.2-001 | Uncharacterized protein                                                                     | Other                                        | PQ UNIQUE    | -    | LMW |
| 63  | ENSDARP00000102472 | vtg4              | vtg4-202              | Vitellogenin 4                                                                              | Vitellogenins                                | PQ UNIQUE    | -    | LMW |
| 64  | ENSDARP00000103251 | qdprb2            | qdprb2-201            | Quinoid dihydropteridine reductase b2                                                       | REDOX/Detox related                          | PQ UNIQUE    | -    | LMW |
| 65  | ENSDARP00000104702 | qdprb2            | qdprb2-001            | Quinoid dihydropteridine reductase b2                                                       | REDOX/Detox related                          | PQ UNIQUE    | -    | LMW |
| 66  | ENSDARP00000005402 | zgc:173556        | zgc:173556-201        | Zona pellucida protein superfamily                                                          | Zona Pellucida proteins                      | PQ UNIQUE    | -    | HMW |
| 67  | ENSDARP00000010482 | ybx1              | ybx1-001              | Y box binding protein 1                                                                     | Protein synthesis                            | PQ UNIQUE    | -    | HMW |
| 68  | ENSDARP00000016831 | cct6a             | cct6a-201             | Chaperonin containing TCP1, subunit 6A (zeta 1)                                             | Protein synthesis                            | PQ UNIQUE    | -    | HMW |
| 69  | ENSDARP00000059040 | h1m               | h1m-201               | Linker histone H1M                                                                          | Cell cycle, division, growth and fate        | PQ UNIQUE    | -    | HMW |
| 70  | ENSDARP00000061743 | zp3a.1            | zp3a.1-001            | Zona pellucida glycoprotein 3a, tandem duplicate 1                                          | Zona Pellucida proteins                      | PQ UNIQUE    | -    | HMW |
| 71  | ENSDARP00000067534 | cap2              | cap2-201              | CAP, adenylate cyclase-associated protein, 2 (yeast)                                        | Cell cycle, division, growth and fate        | PQ UNIQUE    | -    | HMW |
| 72  | ENSDARP00000068662 | zp3.2             | zp3.2-202             | Zona pellucida glycoprotein 3, tandem duplicate 2                                           | Zona Pellucida proteins                      | PQ UNIQUE    | -    | HMW |
| 73  | ENSDARP00000068670 | zgc:173556        | zgc:173556-203        | Zona pellucida protein superfamily                                                          | Zona Pellucida proteins                      | PQ UNIQUE    | -    | HMW |
| 74  | ENSDARP00000095894 | si:dkey-90I23.2   | Novel transcript      | L-rhamnose-binding lectin CSL3-like isoform X2                                              | Lectins                                      | PQ UNIQUE    | -    | HMW |
| 75  | ENSDARP00000099884 | ZP2 (3 of 4)      | ZP2 (3 of 4)-201      | Zona pellucida glycoprotein 2 (sperm receptor)                                              | Zona Pellucida proteins                      | PQ UNIQUE    | -    | HMW |
| 76  | ENSDARP00000101517 | ybx1              | ybx1-201              | Y box binding protein 1                                                                     | Protein synthesis                            | PQ UNIQUE    | -    | HMW |
| 77  | ENSDARP00000105815 | CU695117.1        | CU695117.1-201        | Zinc finger MYM-type protein 1                                                              | Protein synthesis                            | PQ UNIQUE    | -    | HMW |
| 78  | ENSDARP00000105815 | zgc:173556        | zgc:173556-001        | Zona pellucida glycoprotein 3.1                                                             | Zona Pellucida proteins                      | PQ UNIQUE    | -    | HMW |
| 79  | ENSDARP00000107790 | zp3a.1            | zp3a.1-201            | Zona pellucida glycoprotein 3a, tandem duplicate 1                                          | Zona Pellucida proteins                      | PQ UNIQUE    | -    | HMW |
| 80  | ENSDARP00000107948 | CU467646.1        | CU467646.1-201        | Mucin-5B-like isoform X5                                                                    | Other                                        | PQ UNIQUE    | -    | HMW |
| 81  | ENSDARP00000109119 | zp3.2             | zp3.2-201             | Zona pellucida protein superfamily                                                          | Zona Pellucida proteins                      | PQ UNIQUE    | -    | HMW |
| 82  | ENSDARP00000109275 | CU929506.1        | CU929506.1-201        | Zinc finger MYM-type protein 1                                                              | Protein synthesis                            | PQ UNIQUE    | -    | HMW |
| 83  | ENSDARP00000112608 | cct6a             | cct6a-002             | Chaperonin containing TCP1, subunit 6A (zeta 1)                                             | Protein synthesis                            | PQ UNIQUE    | -    | HMW |
| 84  | ENSDARP00000116487 | zgc:165539        | zgc:165539-002        | Mucin-5AC                                                                                   | Other                                        | PQ UNIQUE    | -    | HMW |
| 85  | ENSDARP00000118006 | cct6a             | cct6a-001             | Chaperonin containing TCP1, subunit 6A (zeta 1)                                             | Protein synthesis                            | PQ UNIQUE    | -    | HMW |
| 86  | ENSDARP00000118276 | si:dkey-90I23.1   | Novel transcript      | SUEL type lectin domain                                                                     | Lectins                                      | PQ UNIQUE    | -    | HMW |
| 87  | ENSDARP0000021016  | tubb2             | Novel transcript      | Tubulin beta 2                                                                              | Cell cycle, division, growth and fate        | PQ UNIQUE    | -    | HMW |
| 88  | ENSDARP0000055379  | tubb5             | tubb5-201             | Tubulin beta 5                                                                              | Cell cycle, division, growth and fate        | PQ UNIQUE    | -    | HMW |
| 89  | ENSDARP0000095074  | cnp               | cnp-201               | 2',3'-cyclic nucleotide 3' phosphodiesterase                                                | Cell cycle, division, growth and fate        | PQ UNIQUE    | -    | HMW |
| 90  | ENSDARP00000102472 | vtg4              | vtg4-202              | Vitellogenin 4                                                                              | Vitellogenins                                | PQ UNIQUE    | -    | HMW |
| 91  | ENSDARP00000109625 | tubb2             | Novel transcript      | Tubulin beta 2A chain                                                                       | Cell cycle, division, growth and fate        | PQ UNIQUE    | -    | HMW |
| 92  | ENSDARP00000110851 | FP102463.1        | FP102463.1-201        | Tubulin                                                                                     | Cell cycle, division, growth and fate        | PQ UNIQUE    | -    | HMW |
| 93  | ENSDARP00000119055 | zgc:123194        | zgc:123194-001        | Tubulin                                                                                     | Cell cycle, division, growth and fate        | PQ UNIQUE    | -    | HMW |
| 94  | ENSDARP0000062142  | ARF5 (1 of 2)     | ARF5 (1 of 2)-001     | ADP-ribosylation factor 5                                                                   | Endosome-Lysosome related                    | PQ INCREASED | 7.06 | LMW |
| 95  | ENSDARP0000094243  | arf5              | arf5-201              | ADP-ribosylation factor 5                                                                   | Endosome-Lysosome related                    | PQ INCREASED | 7.06 | LMW |
| 96  | ENSDARP00000116010 | vtg7              | vtg7-002              | Vitellogenin 7                                                                              | Vitellogenins                                | PQ INCREASED | 7.00 | LMW |
| 97  | ENSDARP00000115259 | actb1             | actb1-004             | Actin beta 1                                                                                | Cell cycle, division, growth and fate        | PQ INCREASED | 6.85 | LMW |
| 98  | ENSDARP00000112639 | actb1             | actb1-005             | Actin, beta 1                                                                               | Cell cycle, division, growth and fate        | PQ INCREASED | 6.81 | LMW |
| 99  | ENSDARP00000111487 | rpl22             | rpl22-001             | Ribosomal protein L22                                                                       | Protein synthesis                            | PQ INCREASED | 5.90 | LMW |
| 100 | ENSDARP0000067606  | arf4a             | arf4a-202             | ADP-ribosylation factor 4a                                                                  | Cell cycle, division, growth and fate        | PQ INCREASED | 5.16 | LMW |
| 101 | ENSDARP0000067603  | arf4a             | arf4a-201             | ADP-ribosylation factor 4a                                                                  | Cell cycle, division, growth and fate        | PQ INCREASED | 5.10 | LMW |
| 102 | ENSDARP0000067677  | zgc:110339        | zgc:110339-001        | Uncharacterized                                                                             | REDOX/Detox related                          | PQ INCREASED | 4.24 | LMW |
| 103 | ENSDARP0000046181  | gstm3             | gstm3-001             | Glutathione S-transferase M3 (brain)                                                        | REDOX/Detox related                          | PQ INCREASED | 3.20 | LMW |
| 104 | ENSDARP0000054986  | actb1             | actb1-001             | Actin beta 1                                                                                | Cell cycle, division, growth and fate        | PQ INCREASED | 3.13 | LMW |
| 105 | ENSDARP0000055193  | actb2             | actb2-007             | Actin beta 2                                                                                | Cell cycle, division, growth and fate        | PQ INCREASED | 3.13 | LMW |
| 106 | ENSDARP00000122263 | actb2             | actb2-001             | Actin beta 2                                                                                | Cell cycle, division, growth and fate        | PQ INCREASED | 3.13 | LMW |
| 107 | ENSDARP00000116310 | ube2l3b           | ube2l3b-002           | Ubiquitin-conjugating enzyme E2L 3b                                                         | Protein degradation and synthesis inhibition | PQ INCREASED | 3.07 | LMW |
| 108 | ENSDARP0000033541  | ube2l3a           | ube2l3a-201           | Ubiquitin-conjugating enzyme E2L 3a                                                         | Protein degradation and synthesis inhibition | PQ INCREASED | 3.06 | LMW |
| 109 | ENSDARP0000008064  | ube2l3b           | ube2l3b-003           | Ubiquitin-conjugating enzyme E2L 3b                                                         | Protein degradation and synthesis inhibition | PQ INCREASED | 3.05 | LMW |
| 110 | ENSDARP0000090376  | ube2l3b           | ube2l3b-001           | Ubiquitin-conjugating enzyme E2L 3b                                                         | Protein degradation and synthesis inhibition | PQ INCREASED | 3.05 | LMW |
| 111 | ENSDARP0000032643  | zgc:56530         | zgc:56530-001         | MGC174082 protein-mRNA                                                                      | Other                                        | PQ INCREASED | 3.04 | LMW |
| 112 | ENSDARP0000033513  | sumo3a            | sumo3a-001            | Small ubiquitin-related modifier 3-like                                                     | Cell cycle, division, growth and fate        | PQ INCREASED | 2.73 | LMW |
| 113 | ENSDARP0000052255  | sumo3b            | sumo3b-001            | Small ubiquitin-related modifier                                                            | Cell cycle, division, growth and fate        | PQ INCREASED | 2.73 | LMW |
| 114 | ENSDARP00000108738 | sumo3a            | sumo3a-201            | Small ubiquitin-related modifier 3-like                                                     | Cell cycle, division, growth and fate        | PQ INCREASED | 2.73 | LMW |
| 115 | ENSDARP0000010242  | sumo2b            | sumo2b-201            | Small ubiquitin-related modifier 2                                                          | Cell cycle, division, growth and fate        | PQ INCREASED | 2.71 | LMW |

|     |                    |                   |                       |                                                        |                                              |              |      |     |
|-----|--------------------|-------------------|-----------------------|--------------------------------------------------------|----------------------------------------------|--------------|------|-----|
| 116 | ENSDARP0000006628  | sumo2b            | sumo2b-001            | Small ubiquitin-related modifier 2                     | Cell cycle, division, growth and fate        | PQ INCREASED | 2.71 | LMW |
| 117 | ENSDARP0000006783  | ctf2              | ctf2-001              | Cofilin                                                | Cell cycle, division, growth and fate        | PQ INCREASED | 2.69 | LMW |
| 118 | ENSDARP00000062369 | actc1a            | actc1a-001            | Actin, alpha, cardiac muscle 1a                        | Cell cycle, division, growth and fate        | PQ INCREASED | 2.54 | LMW |
| 119 | ENSDARP00000066429 | acta2             | acta2-201             | Actin, alpha 2, smooth muscle, aorta                   | Cell cycle, division, growth and fate        | PQ INCREASED | 2.54 | LMW |
| 120 | ENSDARP00000075110 | CH211-260D9.2-001 | Novel transcript      | Actin, novel                                           | Cell cycle, division, growth and fate        | PQ INCREASED | 2.54 | LMW |
| 121 | ENSDARP00000100195 | ACTC1 (2 of 2)    | ACTC1 (2 of 2)-002    | Actin alpha 1 (ACTA1)-like                             | Cell cycle, division, growth and fate        | PQ INCREASED | 2.54 | LMW |
| 122 | ENSDARP00000100434 | si:ch73-187m15.4  | Novel transcript      | Actin, alpha, cardiac muscle 1a, novel                 | Cell cycle, division, growth and fate        | PQ INCREASED | 2.54 | LMW |
| 123 | ENSDARP0000009096  | rp12              | rp12-001              | Ribosomal protein L12                                  | Protein synthesis                            | PQ INCREASED | 2.43 | LMW |
| 124 | ENSDARP00000124371 | acta2             | acta2-001             | Actin, alpha 2, smooth muscle, aorta                   | Cell cycle, division, growth and fate        | PQ INCREASED | 2.35 | LMW |
| 125 | ENSDARP00000069198 | ncls              | ncls-201              | Nothepsin                                              | Protein degradation and synthesis inhibition | PQ INCREASED | 2.27 | LMW |
| 126 | ENSDARP00000119104 | dut               | dut-005               | dUTP pyrophosphatase                                   | Cell cycle, division, growth and fate        | PQ INCREASED | 2.20 | LMW |
| 127 | ENSDARP00000122542 | ddx41             | ddx41-002             | DEAD (Asp-Glu-Ala-Asp) box polypeptide 41              | Cell cycle, division, growth and fate        | PQ INCREASED | 2.03 | LMW |
| 128 | ENSDARP00000122730 | ddx41             | ddx41-001             | DEAD (Asp-Glu-Ala-Asp) box polypeptide 41              | Cell cycle, division, growth and fate        | PQ INCREASED | 2.03 | LMW |
| 129 | ENSDARP00000118860 | si:ch1073-75o15.4 | si:ch1073-75o15.4-001 | SUEL type lectin domain                                | Lectins                                      | PQ INCREASED | 1.94 | LMW |
| 130 | ENSDARP00000121416 | si:ch1073-75o15.4 | si:ch1073-75o15.4-002 | L-rhamnose-binding lectin CSL1-like isoform X1         | Lectins                                      | PQ INCREASED | 1.93 | LMW |
| 131 | ENSDARP00000120984 | si:ch211-145c1.1  | si:ch211-145c1.1-001  | Gal lectin superfamily, L-rhamnose-binding lectin CSL3 | Lectins                                      | PQ INCREASED | 6.88 | HMW |
| 132 | ENSDARP00000093515 | si:ch211-145c1.1  | si:ch211-145c1.1-002  | Gal lectin superfamily, L-rhamnose-binding lectin CSL3 | Lectins                                      | PQ INCREASED | 6.85 | HMW |
| 133 | ENSDARP00000020578 | cap1              | cap1-001              | Adenylyl cyclase-associated protein                    | Cell cycle, division, growth and fate        | PQ INCREASED | 3.78 | HMW |
| 134 | ENSDARP00000005460 | c3b               | c3b-201               | Complement component c3b                               | Immune system related                        | PQ INCREASED | 3.13 | HMW |
| 135 | ENSDARP00000108724 | c3b               | c3b-001               | Complement component c3b                               | Immune system related                        | PQ INCREASED | 3.13 | HMW |
| 136 | ENSDARP00000076290 | pdia4             | pdia4-201             | Protein disulfide-isomerase A4                         | Protein synthesis                            | PQ INCREASED | 2.99 | HMW |
| 137 | ENSDARP00000027102 | nap11i            | nap11i-201            | Nucleosome assembly protein 1, like 1                  | Cell cycle, division, growth and fate        | PQ INCREASED | 2.76 | HMW |
| 138 | ENSDARP00000104033 | A2ML1 (7 of 12)   | A2ML1 (7 of 12)-201   | Alpha-2-macroglobulin-like 1                           | Immune system related                        | PQ INCREASED | 2.50 | HMW |
| 139 | ENSDARP00000121031 | hspa8             | hspa8-003             | Heat shock protein 8                                   | Protein synthesis                            | PQ INCREASED | 2.47 | HMW |
| 140 | ENSDARP00000100695 | A2ML1 (7 of 12)   | A2ML1 (7 of 12)-001   | Alpha-2-macroglobulin-like 1                           | Immune system related                        | PQ INCREASED | 2.43 | HMW |
| 141 | ENSDARP00000100381 | A2ML1 (7 of 12)   | A2ML1 (7 of 12)-203   | Alpha-2-macroglobulin-like 1                           | Immune system related                        | PQ INCREASED | 2.38 | HMW |
| 142 | ENSDARP00000100196 | A2ML1 (7 of 12)   | A2ML1 (7 of 12)-202   | Alpha-2-macroglobulin-like 1                           | Immune system related                        | PQ INCREASED | 2.37 | HMW |
| 143 | ENSDARP00000124860 | nap14a            | nap14a-002            | Nucleosome assembly protein 1, like 1                  | Cell cycle, division, growth and fate        | PQ INCREASED | 2.25 | HMW |
| 144 | ENSDARP00000094479 | nap14a            | nap14a-001            | Nucleosome assembly protein 1, like 2                  | Cell cycle, division, growth and fate        | PQ INCREASED | 2.24 | HMW |
| 145 | ENSDARP00000103384 | prmt1             | prmt1-001             | Protein arginine methyltransferase 1                   | Cell cycle, division, growth and fate        | PQ INCREASED | 2.14 | HMW |
| 146 | ENSDARP00000027115 | taldo1            | taldo1-201            | Transaldolase                                          | Energy metabolism                            | PQ INCREASED | 2.00 | HMW |
| 147 | ENSDARP00000067816 | chia.3            | chia.3-001            | Chitinase, acidic.3                                    | Immune system related                        | PQ INCREASED | 2.00 | HMW |
| 148 | ENSDARP00000103361 | si:ch211-14a17.7  | si:ch211-14a17.7-201  | Zona pellucida protein superfamily                     | Zona Pellucida proteins                      | PQ INCREASED | 2.00 | HMW |
| 149 | ENSDARP00000116459 | si:ch211-14a17.7  | si:ch211-14a17.7-001  | Zona pellucida protein superfamily                     | Zona Pellucida proteins                      | PQ INCREASED | 2.00 | HMW |
| 150 | ENSDARP00000003107 | cct7              | cct7-001              | Chaperonin containing TCP1, subunit 7                  | Protein synthesis                            | PQ INCREASED | 2.00 | HMW |
| 151 | ENSDARP00000020361 | gcat              | gcat-001              | Glycine C-acetyltransferase                            | Protein synthesis                            | PQ INCREASED | 2.00 | HMW |
| 152 | ENSDARP00000090833 | prdx4             | prdx4-001             | Peroxiredoxin 4                                        | REDOX/Detox related                          | GQ INCREASED | 0.50 | LMW |
| 153 | ENSDARP00000094194 | vtg3              | vtg3-202              | Vitellogenin 3                                         | Vitellogenins                                | GQ INCREASED | 0.50 | LMW |
| 154 | ENSDARP00000072678 | vtg7              | vtg7-201              | Vitellogenin 7                                         | Vitellogenins                                | GQ INCREASED | 0.50 | LMW |
| 155 | ENSDARP00000114558 | vtg7              | vtg7-001              | Vitellogenin 7                                         | Vitellogenins                                | GQ INCREASED | 0.50 | LMW |
| 156 | ENSDARP00000116066 | celsr3            | celsr3-002            | Cadherin, EGF LAG seven-pass G-type receptor 3         | Other                                        | GQ INCREASED | 0.50 | LMW |
| 157 | ENSDARP00000118276 | si:dkey-90I23.1   | Novel transcript      | SUEL type lectin domain                                | Lectins                                      | GQ INCREASED | 0.50 | LMW |
| 158 | ENSDARP00000063876 | prdx6             | prdx6-001             | Peroxiredoxin 6                                        | REDOX/Detox related                          | GQ INCREASED | 0.50 | LMW |
| 159 | ENSDARP00000096079 | si:ch211-226h8.4  | si:ch211-226h8.4-001  | SUEL type lectin domain                                | Lectins                                      | GQ INCREASED | 0.49 | LMW |
| 160 | ENSDARP00000115012 | vtg4              | vtg4-001              | Vitellogenin 4                                         | Vitellogenins                                | GQ INCREASED | 0.49 | LMW |
| 161 | ENSDARP00000050237 | vtg1              | vtg1-001              | Vitellogenin 1                                         | Vitellogenins                                | GQ INCREASED | 0.49 | LMW |
| 162 | ENSDARP00000101309 | vtg4              | vtg4-201              | Vitellogenin 4                                         | Vitellogenins                                | GQ INCREASED | 0.49 | LMW |
| 163 | ENSDARP00000072738 | vtg1              | vtg1-201              | Vitellogenin 1                                         | Vitellogenins                                | GQ INCREASED | 0.48 | LMW |
| 164 | ENSDARP00000072790 | vtg2              | vtg2-201              | Vitellogenin 2                                         | Vitellogenins                                | GQ INCREASED | 0.47 | LMW |
| 165 | ENSDARP00000096034 | vtg2              | vtg2-202              | Vitellogenin 2                                         | Vitellogenins                                | GQ INCREASED | 0.47 | LMW |
| 166 | ENSDARP00000120934 | prdx3             | prdx3-002             | Peroxiredoxin 3                                        | REDOX/Detox related                          | GQ INCREASED | 0.45 | LMW |
| 167 | ENSDARP00000123406 | si:dkeyp-46h3.8   | si:dkeyp-46h3.8-001   | SUEL type lectin domain                                | Lectins                                      | GQ INCREASED | 0.44 | LMW |
| 168 | ENSDARP00000115568 | si:dkeyp-46h3.8   | si:dkeyp-46h3.8-201   | SUEL type lectin domain                                | Lectins                                      | GQ INCREASED | 0.44 | LMW |
| 169 | ENSDARP00000096443 | crp6              | crp6-001              | C-reactive protein 6                                   | Immune system related                        | GQ INCREASED | 0.43 | LMW |
| 170 | ENSDARP00000113089 | dut               | dut-003               | dUTP pyrophosphatase                                   | Cell cycle, division, growth and fate        | GQ INCREASED | 0.41 | LMW |
| 171 | ENSDARP00000122570 | dut               | dut-002               | dUTP pyrophosphatase                                   | Cell cycle, division, growth and fate        | GQ INCREASED | 0.40 | LMW |
| 172 | ENSDARP00000108320 | dut               | dut-001               | dUTP pyrophosphatase-deoxyundine triphosphatase        | Cell cycle, division, growth and fate        | GQ INCREASED | 0.40 | LMW |
| 173 | ENSDARP00000023863 | rpe               | rpe-001               | Ribulose-5-phosphate-3-epimerase                       | Energy metabolism                            | GQ INCREASED | 0.40 | LMW |
| 174 | ENSDARP00000048374 | stmn4             | stmn4-001             | Stathmin-like 4                                        | Cell cycle, division, growth and fate        | GQ INCREASED | 0.39 | LMW |
| 175 | ENSDARP00000113219 | stmn4             | stmn4-002             | Stathmin-like 4                                        | Cell cycle, division, growth and fate        | GQ INCREASED | 0.39 | LMW |
| 176 | ENSDARP00000023158 | vtg3              | vtg3-201              | Vitellogenin 3                                         | Vitellogenins                                | GQ INCREASED | 0.38 | LMW |
| 177 | ENSDARP00000120407 | si:ch211-250e5.16 | si:ch211-250e5.16-001 | SUEL type lectin domain                                | Lectins                                      | GQ INCREASED | 0.36 | LMW |

|     |                    |                   |                       |                                                                                             |                                       |              |      |     |
|-----|--------------------|-------------------|-----------------------|---------------------------------------------------------------------------------------------|---------------------------------------|--------------|------|-----|
| 178 | ENSDARP00000128406 | vtg3              | vtg3-001              | Vitellogenin 3                                                                              | Vitellogenins                         | GQ INCREASED | 0.36 | LMW |
| 179 | ENSDARP0000032532  | ran               | ran-003               | GTP-binding nuclear protein Ran-Ras related nuclear protein                                 | Cell cycle, division, growth and fate | GQ INCREASED | 0.35 | LMW |
| 180 | ENSDARP00000108629 | ran               | ran-001               | RAN, member RAS oncogene family                                                             | Cell cycle, division, growth and fate | GQ INCREASED | 0.35 | LMW |
| 181 | ENSDARP00000121831 | ran               | ran-002               | RAN, member RAS oncogene family                                                             | Cell cycle, division, growth and fate | GQ INCREASED | 0.35 | LMW |
| 182 | ENSDARP00000090756 | glo1              | glo1-001              | Glyoxalase 1-Lactoylglutathione lyase                                                       | Energy metabolism                     | GQ INCREASED | 0.34 | LMW |
| 183 | ENSDARP00000117771 | eif5a2            | eif5a2-004            | Translation initiation factor                                                               | Protein synthesis                     | GQ INCREASED | 0.33 | LMW |
| 184 | ENSDARP00000073095 | eif5a2            | eif5a2-001            | Translation initiation factor                                                               | Protein synthesis                     | GQ INCREASED | 0.33 | LMW |
| 185 | ENSDARP00000117947 | eif5a2            | eif5a2-002            | Translation initiation factor                                                               | Protein synthesis                     | GQ INCREASED | 0.33 | LMW |
| 186 | ENSDARP00000120991 | eif5a2            | eif5a2-003            | Translation initiation factor                                                               | Protein synthesis                     | GQ INCREASED | 0.33 | LMW |
| 187 | ENSDARP00000117883 | si:dkey-88116.3   | si:dkey-88116.3-001   | Low-density lipoprotein receptor-related protein 2 isoform X5                               | Lipid metabolism                      | GQ INCREASED | 0.30 | LMW |
| 188 | ENSDARP00000056381 | crp3              | crp3-201              | C-reactive protein 2                                                                        | Immune system related                 | GQ INCREASED | 0.23 | LMW |
| 189 | ENSDARP00000104927 | crp3              | crp3-202              | C-reactive protein 3                                                                        | Immune system related                 | GQ INCREASED | 0.23 | LMW |
| 190 | ENSDARP00000116589 | crp3              | crp3-001              | C-reactive protein 3                                                                        | Immune system related                 | GQ INCREASED | 0.23 | LMW |
| 191 | ENSDARP00000053425 | pfn2l             | pfn2l-001             | Profilin 2 like                                                                             | Cell cycle, division, growth and fate | GQ INCREASED | 0.16 | LMW |
| 192 | ENSDARP00000113417 | pfn2l             | pfn2l-002             | Profilin 2 like                                                                             | Cell cycle, division, growth and fate | GQ INCREASED | 0.16 | LMW |
| 193 | ENSDARP00000128438 | pfn2l             | pfn2l-003             | Profilin 2 like                                                                             | Cell cycle, division, growth and fate | GQ INCREASED | 0.16 | LMW |
| 194 | ENSDARP00000089804 | zgc:136254        | zgc:136254-001        | Fish egg lectin like isoform X1                                                             | Endosome-Lysosome related             | GQ INCREASED | 0.16 | LMW |
| 195 | ENSDARP00000129497 | zgc:136254        | zgc:136254-201        | Fish egg lectin like isoform X1                                                             | Endosome-Lysosome related             | GQ INCREASED | 0.16 | LMW |
| 196 | ENSDARP00000070002 | aldh6a1           | aldh6a1-001           | Aldehyde dehydrogenase 6 family, member A1                                                  | Energy metabolism                     | GQ INCREASED | 0.55 | HMW |
| 197 | ENSDARP00000116781 | si:dkey-152b24.6  | si:dkey-152b24.6-001  | 1-phosphatidylinositol phosphodiesterase-like                                               | Lipid metabolism                      | GQ INCREASED | 0.54 | HMW |
| 198 |                    | si:ch1073-13h15.3 | si:ch1073-13h15.3-001 | Putative all-trans-retinol 13,14-reductase                                                  | Other                                 | GQ INCREASED | 0.54 | HMW |
| 199 | ENSDARP00000024082 | atic              | atic-001              | 5-aminimidazole-4-carboxamide ribonucleotide formyltransferase/IMP cyclohydrolase           | Cell cycle, division, growth and fate | GQ INCREASED | 0.54 | HMW |
| 200 | ENSDARP00000008576 | A2ML1 (1 of 12)   | A2ML1 (1 of 12)-001   | Alpha-2-macroglobulin-like 1                                                                | Immune system related                 | GQ INCREASED | 0.53 | HMW |
| 201 | ENSDARP00000069178 | si:ch1073-13h15.3 | si:ch1073-13h15.3-201 | Putative all-trans-retinol 13,14-reductase                                                  | Other                                 | GQ INCREASED | 0.53 | HMW |
| 202 | ENSDARP0000014978  | hsp90ab1          | hsp90ab1-001          | Heat shock protein 90, alpha (cytosolic), class B member 1                                  | Protein synthesis                     | GQ INCREASED | 0.50 | HMW |
| 203 | ENSDARP00000025538 | ranbp1            | ranbp1-001            | RAN binding protein 1                                                                       | Other                                 | GQ INCREASED | 0.50 | HMW |
| 204 | ENSDARP00000060204 | tufm              | tufm-001              | Elongation factor Tu                                                                        | Protein synthesis                     | GQ INCREASED | 0.50 | HMW |
| 205 | ENSDARP00000101406 | ranbp1            | ranbp1-201            | RAN binding protein 1                                                                       | Other                                 | GQ INCREASED | 0.50 | HMW |
| 206 | ENSDARP00000104512 | hsp90ab1          | hsp90ab1-201          | Heat shock protein 90, alpha (cytosolic), class B member 1                                  | Protein synthesis                     | GQ INCREASED | 0.50 | HMW |
| 207 | ENSDARP00000025702 | tfa               | tfa-201               | Transferrin a                                                                               | Immune system related                 | GQ INCREASED | 0.49 | HMW |
| 208 | ENSDARP0000012767  | aldh2.1           | aldh2.1-001           | Aldehyde dehydrogenase 2, tandem duplicate 1                                                | Lipid metabolism                      | GQ INCREASED | 0.49 | HMW |
| 209 | ENSDARP00000100241 | tfa               | tfa-001               | Transferrin a                                                                               | Immune system related                 | GQ INCREASED | 0.49 | HMW |
| 210 | ENSDARP00000062351 | SLC25A6 (1 of 2)  | SLC25A6 (1 of 2)-201  | Solute carrier family 25 (mitochondrial carrier; adenine nucleotide translocator), member 6 | Cell cycle, division, growth and fate | GQ INCREASED | 0.46 | HMW |
| 211 | ENSDARP00000096509 | SLC25A6 (1 of 2)  | SLC25A6 (1 of 2)-001  | Solute carrier family 25 (mitochondrial carrier; adenine nucleotide translocator), member 6 | Cell cycle, division, growth and fate | GQ INCREASED | 0.46 | HMW |
| 212 | ENSDARP00000008085 | setb              | setb-001              | SET translocation (myeloid leukemia-associated) B                                           | Cell cycle, division, growth and fate | GQ INCREASED | 0.46 | HMW |
| 213 | ENSDARP00000066176 | tuba2             | tuba2-001             | Tubulin alpha 2                                                                             | Cell cycle, division, growth and fate | GQ INCREASED | 0.45 | HMW |
| 214 | ENSDARP00000022077 | slc25a6           | slc25a6-001           | Solute carrier family 25 (mitochondrial carrier; adenine nucleotide translocator), member 6 | Cell cycle, division, growth and fate | GQ INCREASED | 0.45 | HMW |
| 215 | ENSDARP00000030881 | slc25a4           | slc25a4-001           | Solute carrier family 25 (mitochondrial carrier; adenine nucleotide translocator), member 6 | Cell cycle, division, growth and fate | GQ INCREASED | 0.45 | HMW |
| 216 | ENSDARP00000058383 | gapdhs            | gapdhs-001            | Glyceraldehyde-3-phosphate dehydrogenase, spermatogenic                                     | Energy metabolism                     | GQ INCREASED | 0.45 | HMW |
| 217 | ENSDARP00000120922 | decr1             | decr1-001             | 2,4-dienoyl CoA reductase 1, mitochondrial                                                  | Energy metabolism                     | GQ INCREASED | 0.45 | HMW |
| 218 | ENSDARP00000023429 | aldh2.2           | aldh2.2-001           | Aldehyde dehydrogenase 2, tandem duplicate 1                                                | Energy metabolism                     | GQ INCREASED | 0.45 | HMW |
| 219 | ENSDARP00000088020 | aldh2.2           | aldh2.2-202           | Aldehyde dehydrogenase 2, tandem duplicate 1                                                | Energy metabolism                     | GQ INCREASED | 0.45 | HMW |
| 220 | ENSDARP00000088019 | aldh2.2           | aldh2.2-201           | Aldehyde dehydrogenase 2, tandem duplicate 1                                                | Energy metabolism                     | GQ INCREASED | 0.44 | HMW |
| 221 | ENSDARP00000117350 | gale              | gale-001              | UDP-galactose 4-epimerase                                                                   | Energy metabolism                     | GQ INCREASED | 0.42 | HMW |
| 222 | ENSDARP00000110334 | gale              | gale-201              | UDP-galactose 4-epimerase                                                                   | Energy metabolism                     | GQ INCREASED | 0.41 | HMW |
| 223 | ENSDARP00000073345 | A2ML1 (1 of 12)   | A2ML1 (1 of 12)-201   | Alpha-2-macroglobulin-like 1                                                                | Immune system related                 | GQ INCREASED | 0.40 | HMW |
| 224 | ENSDARP00000116143 | esd               | esd-002               | Esterase D/fornylglutathione hydrolase                                                      | Other                                 | GQ INCREASED | 0.37 | HMW |
| 225 | ENSDARP00000118149 | esd               | esd-003               | Esterase D/fornylglutathione hydrolase                                                      | Other                                 | GQ INCREASED | 0.37 | HMW |
| 226 | ENSDARP00000024121 | esd               | esd-001               | Esterase D/fornylglutathione hydrolase                                                      | Other                                 | GQ INCREASED | 0.36 | HMW |
| 227 | ENSDARP00000114456 | vdac2             | vdac2-001             | Voltage-dependent anion channel 2                                                           | Cell cycle, division, growth and fate | GQ INCREASED | 0.34 | HMW |
| 228 | ENSDARP00000111790 | vdac2             | vdac2-201             | Voltage-dependent anion channel 2                                                           | Cell cycle, division, growth and fate | GQ INCREASED | 0.34 | HMW |
| 229 | ENSDARP00000114537 | pgk1              | pgk1-003              | Phosphoglycerate kinase 1                                                                   | Energy metabolism                     | GQ INCREASED | 0.34 | HMW |
| 230 | ENSDARP00000119690 | akr1a1b           | akr1a1b-004           | Aldo-keto reductase family 1, member A1a (aldehyde reductase)                               | Lipid metabolism                      | GQ INCREASED | 0.32 | HMW |
| 231 | ENSDARP00000113696 | akr1a1b           | akr1a1b-005           | Aldo-keto reductase family 1, member A1a (aldehyde reductase)                               | Lipid metabolism                      | GQ INCREASED | 0.32 | HMW |
| 232 | ENSDARP00000120539 | akr1a1b           | akr1a1b-006           | Aldo-keto reductase family 1, member A1a (aldehyde reductase)                               | Lipid metabolism                      | GQ INCREASED | 0.32 | HMW |
| 233 | ENSDARP00000096504 | slc25a5           | slc25a5-001           | Solute carrier family 25 (mitochondrial carrier; adenine nucleotide translocator), member 6 | Cell cycle, division, growth and fate | GQ INCREASED | 0.30 | HMW |
| 234 | ENSDARP00000040408 | ppa1b             | ppa1b-001             | Phosphotyrosine phosphohistidine inorganic pyrophosphate phosphatase                        | Energy metabolism                     | GQ INCREASED | 0.28 | HMW |
| 235 | ENSDARP00000034804 | st13              | st13-201              | Suppression of tumorigenicity 13 (colon carcinoma) (Hsp70 interacting protein)              | Protein synthesis                     | GQ INCREASED | 0.28 | HMW |
| 236 | ENSDARP00000112549 | st13              | st13-001              | Suppression of tumorigenicity 13 (colon carcinoma) (Hsp70 interacting protein)              | Protein synthesis                     | GQ INCREASED | 0.28 | HMW |
| 237 | ENSDARP00000070807 | pgk1              | pgk1-001              | Phosphoglycerate kinase 1                                                                   | Energy metabolism                     | GQ INCREASED | 0.27 | HMW |
| 238 | ENSDARP00000124008 | aldh6a1           | aldh6a1-003           | Aldehyde dehydrogenase 6 family, member A1                                                  | Energy metabolism                     | GQ INCREASED | 0.25 | HMW |
| 239 | ENSDARP00000123894 | aldh6a1           | aldh6a1-002           | Aldehyde dehydrogenase 6 family, member A1                                                  | Energy metabolism                     | GQ INCREASED | 0.25 | HMW |

|     |                    |                  |                      |                                                        |                                              |              |      |     |
|-----|--------------------|------------------|----------------------|--------------------------------------------------------|----------------------------------------------|--------------|------|-----|
| 240 | ENSDARP0000070667  | zgc:171779       | zgc:171779-201       | Zona pellucida superfamily                             | Cell cycle, division, growth and fate        | GQ INCREASED | 0.24 | HMW |
| 241 | ENSDARP0000006510  | pgm1             | pgm1-001             | Phosphoglucomutase 1                                   | Energy metabolism                            | GQ INCREASED | 0.10 | HMW |
| 242 | ENSDARP00000113349 | KRT23 (1 of 2)   | KRT23 (1 of 2)-003   | Keratin 17                                             | Cell cycle, division, growth and fate        | GQ UNIQUE    | -    | LMW |
| 243 | ENSDARP00000089806 | si:ch211-251f6.7 | si:ch211-251f6.7-201 | Fish egg lectin like precursor                         | Lectins                                      | GQ UNIQUE    | -    | LMW |
| 244 | ENSDARP00000113985 | si:ch211-251f6.7 | si:ch211-251f6.7-001 | Fish egg lectin like precursor                         | Lectins                                      | GQ UNIQUE    | -    | LMW |
| 245 | ENSDARP00000115840 | dut              | dut-004              | Deoxyuridine triphosphatase                            | Cell cycle, division, growth and fate        | GQ UNIQUE    | -    | LMW |
| 246 | ENSDARP00000059013 | zgc:173443       | zgc:173443-001       | Fish egg lectin like precursor                         | Lectins                                      | GQ UNIQUE    | -    | LMW |
| 247 | ENSDARP00000034555 | cycsb            | cycsb-001            | cytochrome c, somatic b                                | Energy metabolism                            | GQ UNIQUE    | -    | LMW |
| 248 | ENSDARP00000037864 | glrx             | glrx-001             | Glutaredoxin (thioltransferase)                        | Protein synthesis                            | GQ UNIQUE    | -    | LMW |
| 249 | ENSDARP00000076087 | glrx             | glrx-201             | Glutaredoxin (thioltransferase)                        | Protein synthesis                            | GQ UNIQUE    | -    | LMW |
| 250 | ENSDARP00000120838 | glrx             | glrx-002             | Glutaredoxin (thioltransferase)                        | Protein synthesis                            | GQ UNIQUE    | -    | LMW |
| 251 | ENSDARP00000121692 | gstm3            | gstm3-002            | Glutathione S transferase M3 (brain)                   | REDOX/Detox related                          | GQ UNIQUE    | -    | LMW |
| 252 | ENSDARP00000051749 | si:rp71-45k5.4   | si:rp71-45k5.4-001   | Proteasome subunit alpha 2                             | Protein degradation and synthesis inhibition | GQ UNIQUE    | -    | LMW |
| 253 | ENSDARP00000128459 | si:rp71-45k5.4   | si:rp71-45k5.4-202   | Proteasome subunit alpha 2                             | Protein degradation and synthesis inhibition | GQ UNIQUE    | -    | LMW |
| 254 | ENSDARP00000058679 | psma2            | psma2-201            | Proteasome subunit alpha 2                             | Protein degradation and synthesis inhibition | GQ UNIQUE    | -    | LMW |
| 255 | ENSDARP00000127697 | si:rp71-45k5.4   | si:rp71-45k5.4-201   | Proteasome subunit alpha 2                             | Protein degradation and synthesis inhibition | GQ UNIQUE    | -    | LMW |
| 256 | ENSDARP00000075482 | sb.cb252         | sb.cb252-201         | ES1 protein homolog, mitochondrial                     | Energy metabolism                            | GQ UNIQUE    | -    | LMW |
| 257 | ENSDARP00000027268 | gspt1l           | gspt1l-001           | G1 to S phase transition 1, like                       | Protein synthesis                            | GQ UNIQUE    | -    | HMW |
| 258 | ENSDARP00000039367 | prmt1            | prmt1-002            | Protein arginine methyltransferase 1                   | Cell cycle, division, growth and fate        | GQ UNIQUE    | -    | HMW |
| 259 | ENSDARP00000052324 | f2               | f2-001               | Coagulation factor II, thrombin                        | Immune system related                        | GQ UNIQUE    | -    | HMW |
| 260 | ENSDARP00000057644 | qsox1            | qsox1-001            | Quiescin Q6 sulfhydryl oxidase 1                       | Protein synthesis                            | GQ UNIQUE    | -    | HMW |
| 261 | ENSDARP00000096969 | psmc5            | psmc5-001            | Proteasome (prosome, macropain) 26S subunit, ATPase, 5 | Protein synthesis                            | GQ UNIQUE    | -    | HMW |
| 262 | ENSDARP00000104071 | f2               | f2-002               | Coagulation factor II, thrombin                        | Immune system related                        | GQ UNIQUE    | -    | HMW |
| 263 | ENSDARP00000105266 | zgc:152830       | zgc:152830-201       | Peptidase M17 superfamily                              | Protein degradation and synthesis inhibition | GQ UNIQUE    | -    | HMW |
| 264 | ENSDARP00000108730 | ifa              | ifa-202              | Transferrin a                                          | Immune system related                        | GQ UNIQUE    | -    | HMW |
| 265 | ENSDARP00000110443 | BX323793.2       | BX323793.2-201       | 1-phosphatidylinositol phosphodiesterase-like          | Lipid metabolism                             | GQ UNIQUE    | -    | HMW |
| 266 | ENSDARP00000114109 | si:dkey-152b24.7 | si:dkey-152b24.7-201 | 1-phosphatidylinositol phosphodiesterase-like          | Lipid metabolism                             | GQ UNIQUE    | -    | HMW |
| 267 | ENSDARP00000112306 | pycr1b           | pycr1b-201           | Pyroline-5-carboxylate reductase 1b                    | Protein degradation and synthesis inhibition | GQ UNIQUE    | -    | HMW |
| 268 | ENSDARP00000116484 | gspt1l           | gspt1l-002           | G1 to S phase transition 1, like                       | Protein synthesis                            | GQ UNIQUE    | -    | HMW |
| 269 | ENSDARP00000116563 | si:dkey-152b24.7 | si:dkey-152b24.7-001 | 1-phosphatidylinositol phosphodiesterase-like          | Lipid metabolism                             | GQ UNIQUE    | -    | HMW |
| 270 | ENSDARP00000117331 | nasp             | nasp-002             | Nuclear autoantigenic sperm protein (histone-binding)  | Protein synthesis                            | GQ UNIQUE    | -    | HMW |
| 271 | ENSDARP00000118947 | gale             | gale-002             | UDP-galactose-4-epimerase                              | Energy metabolism                            | GQ UNIQUE    | -    | HMW |
| 272 | ENSDARP00000127771 | zgc:152830       | zgc:152830-001       | Peptidase M17 superfamily                              | Protein degradation and synthesis inhibition | GQ UNIQUE    | -    | HMW |
| 273 | ENSDARP00000128522 | ifa              | ifa-003              | Transferrin a                                          | Immune system related                        | GQ UNIQUE    | -    | HMW |
| 274 | ENSDARP00000017776 | A2ML1 (10 of 12) | A2ML1 (10 of 12)-201 | Alpha-2-macroglobulin-like 1                           | Lipid metabolism                             | GQ UNIQUE    | -    | HMW |
