# Supplementary material for: Scrambled eggs: Proteomic portraits and novel biomarkers of egg quality in zebrafish (Danio rerio)
Source: PubMed Central journal article supplement (PMC5690628; doi:10.1371/journal.pone.0188084), 2017-11-16
Supplement: pone.0188084.s003.pdf [file pone.0188084.s003.pdf]

**S3 Table. Enrichment of PANTHER pathways with differentially regulated proteins.** Results of overrepresentation binomial tests [27] for enrichment of PANTHER pathways with proteins showing a  $\geq 2$ -fold difference in N-SC between egg quality groups, or unique to an egg quality group, in the Pooled Samples Experiment (top) and in the Multiple Samples Experiment (bottom). Only statistically significant results ( $p \leq 0.05$  after Bonferroni correction for multiple tests) are reported. Numbers of mapped and unmapped proteins are given in **Fig 3 and Fig 5**.

| <b>PANTHER Overrepresentation Test</b>                                        |                    | PANTHER version 11.0 Released 2016                         |                     |                       |                            |                    |
|-------------------------------------------------------------------------------|--------------------|------------------------------------------------------------|---------------------|-----------------------|----------------------------|--------------------|
| Analyzed List: <i>Danio rerio</i> (input - differentially regulated proteins) |                    | Reference List: <i>Danio rerio</i> (all genes in database) |                     |                       |                            |                    |
| <b>POOLED SAMPLES EXPERIMENT</b>                                              |                    | <b>POOR QUALITY EGGS</b>                                   |                     |                       |                            |                    |
| <b>PANTHER Pathways</b>                                                       | REFLIST<br>(27187) | Input<br>(194)                                             | Input<br>(expected) | Input<br>(over/under) | Input (fold<br>Enrichment) | Input<br>(P-value) |
| Cytoskeletal regulation by Rho GTPase (P00016)                                | 120                | 12                                                         | 0.86                | +                     | 14.01                      | 1.67E-08           |
| Parkinson disease (P00049)                                                    | 112                | 11                                                         | 0.8                 | +                     | 13.76                      | 1.22E-07           |
| Huntington disease (P00029)                                                   | 183                | 13                                                         | 1.31                | +                     | 9.96                       | 1.69E-07           |
| Cadherin signaling (P00012)                                                   | 183                | 12                                                         | 1.31                | +                     | 9.19                       | 1.79E-06           |
| FGF signaling (P00021)                                                        | 160                | 10                                                         | 1.14                | +                     | 8.76                       | 4.69E-05           |
| Nicotinic acetylcholine receptor signaling (P00044)                           | 141                | 8                                                          | 1.01                | +                     | 7.95                       | 1.46E-03           |
| EGF receptor signaling (P00018)                                               | 174                | 9                                                          | 1.24                | +                     | 7.25                       | 8.46E-04           |
| Alzheimer disease-presenilin (P00004)                                         | 166                | 8                                                          | 1.18                | +                     | 6.75                       | 4.65E-03           |
| Integrin signaling (P00034)                                                   | 219                | 9                                                          | 1.56                | +                     | 5.76                       | 5.10E-03           |
| Wnt signaling (P00057)                                                        | 388                | 13                                                         | 2.77                | +                     | 4.7                        | 8.32E-04           |
| Inflammation mediated by chemokine /cytokine signaling (P00031)               | 353                | 10                                                         | 2.52                | +                     | 3.97                       | 3.94E-02           |
| Unclassified (UNCLASSIFIED)                                                   | 24075              | 146                                                        | 171.79              | -                     | 0.85                       | 0.00E+00           |
|                                                                               |                    | <b>GOOD QUALITY EGGS</b>                                   |                     |                       |                            |                    |
| <b>PANTHER Pathways</b>                                                       | REFLIST<br>(27187) | Input<br>(251)                                             | Input<br>(expected) | Input<br>(over/under) | Input (fold<br>Enrichment) | Input<br>(P-value) |
| Pyruvate metabolism (P02772)                                                  | 15                 | 6                                                          | 0.14                | +                     | 43.33                      | 1.26E-06           |
| De novo purine biosynthesis (P02738)                                          | 33                 | 4                                                          | 0.3                 | +                     | 13.13                      | 4.22E-02           |
| Unclassified (UNCLASSIFIED)                                                   | 24075              | 188                                                        | 222.27              | -                     | 0.85                       | 0.00E+00           |
| <b>MULTIPLE SAMPLES EXPERIMENT</b>                                            |                    | <b>POOR QUALITY EGGS</b>                                   |                     |                       |                            |                    |
| <b>PANTHER Pathways</b>                                                       | REFLIST<br>(27187) | Input<br>(74)                                              | Input<br>(expected) | Input<br>(over/under) | Input (fold<br>Enrichment) | Input<br>(P-value) |
| Cytoskeletal regulation by Rho GTPase (P00016)                                | 120                | 15                                                         | 0.33                | +                     | 45.92                      | 1.03E-18           |
| Huntington disease (P00029)                                                   | 183                | 17                                                         | 0.5                 | +                     | 34.13                      | 2.92E-19           |
| Nicotinic acetylcholine receptor signaling pathway (P00044)                   | 141                | 10                                                         | 0.38                | +                     | 26.06                      | 1.14E-09           |
| Alzheimer disease-presenilin pathway (P00004)                                 | 166                | 11                                                         | 0.45                | +                     | 24.35                      | 1.98E-10           |
| Cadherin signaling pathway (P00012)                                           | 183                | 11                                                         | 0.5                 | +                     | 22.08                      | 5.57E-10           |
| Parkinson disease (P00049)                                                    | 112                | 6                                                          | 0.3                 | +                     | 19.68                      | 1.09E-04           |
| Integrin signaling pathway (P00034)                                           | 219                | 7                                                          | 0.6                 | +                     | 11.74                      | 3.78E-04           |
| Inflammation med. by chemokine & cytokine signaling (P00031)                  | 353                | 10                                                         | 0.96                | +                     | 10.41                      | 7.02E-06           |
| Wnt signaling pathway (P00057)                                                | 388                | 9                                                          | 1.06                | +                     | 8.52                       | 1.80E-04           |
| Unclassified (UNCLASSIFIED)                                                   | 24075              | 43                                                         | 65.53               | -                     | 0.66                       | 0.00E+00           |
|                                                                               |                    | <b>GOOD QUALITY EGGS</b>                                   |                     |                       |                            |                    |
| <b>PANTHER Pathways</b>                                                       | REFLIST<br>(27187) | Input<br>(60)                                              | Input<br>(expected) | Input<br>(over/under) | Input (fold<br>Enrichment) | Input<br>(P-value) |
| 5-Hydroxytryptamine degradation (P04372)                                      | 19                 | 3                                                          | 0.04                | +                     | 71.54                      | 1.73E-03           |
| Unclassified (UNCLASSIFIED)                                                   | 24075              | 43                                                         | 53.13               | -                     | 0.81                       | 0.00E+00           |
