# Supplementary material for: Scrambled eggs: Proteomic portraits and novel biomarkers of egg quality in zebrafish (Danio rerio)
Source: PubMed Central journal article supplement (PMC5690628; doi:10.1371/journal.pone.0188084), 2017-11-16
Supplement: pone.0188084.s005.pdf [file pone.0188084.s005.pdf]

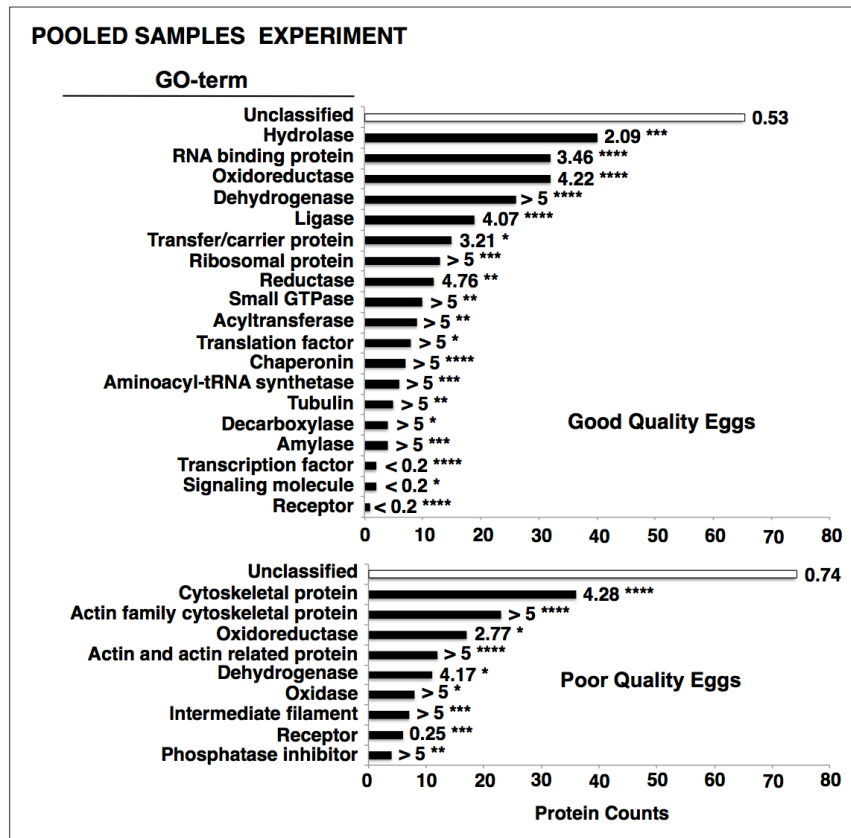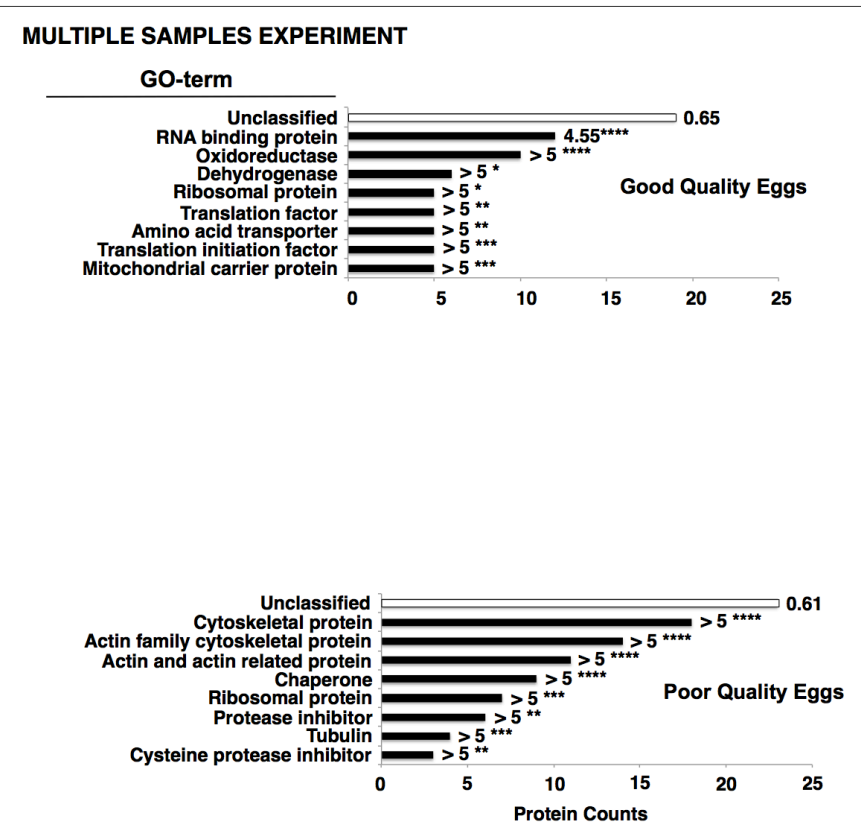

**S2 Fig. Enrichment of Protein Class GO terms with differentially regulated proteins.** Results of over-representation binomial tests [27] for enrichment of Protein Class GO terms (PANTHER GO-Slim) with proteins up-regulated in good and poor quality zebrafish eggs. **Left Panel.** Pooled Samples Experiment. **Right Panel.** Multiple Samples Experiment. Horizontal bars indicate the number of proteins attributed to each GO term for which statistically significant results ( $p \leq 0.05$  after Bonferroni correction for multiple tests) were observed. Numbers next to the bars indicate the fold-enrichment with proteins attributed to each term and the number of asterisks indicates the significance level of the enrichment, as follows  $p \leq 0.05$  (\*),  $p \leq 0.01$  (\*\*),  $p \leq 0.001$  (\*\*\*), and  $p \leq 0.0001$  (\*\*\*\*).
